# Supplementary material for: Morphological sensitivity of silver nanoparticles to the environment
Source: Royal Society of Chemistry journal article supplement (doi:10.1039/d2en01129h), 2023-01-01
Supplement: d2en01129h1.pdf [file d2en01129h1.pdf]

## **Morphological Sensitivity of Silver Nanoparticles to Environment**

### **[Electronic Supplementary Information]**

Nathalie Tarrat<sup>a</sup> and David Loffreda<sup>b</sup>

<sup>a</sup> CEMES, CNRS, Université de Toulouse, 29 Rue Jeanne Marvig, 31055 Toulouse, France; Tel: +33(5) 6752 4347; E-mail: [nathalie.tarrat@cemes.fr](mailto:nathalie.tarrat@cemes.fr)

<sup>b</sup> ENSL, CNRS, Laboratoire de Chimie UMR 5182, 46 allée d'Italie, 69364 Lyon France; Tel: +33(4) 7244 8843; E-mail: [david.loffreda@ens-lyon.fr](mailto:david.loffreda@ens-lyon.fr)

| System                 | Environment        | Contamination | Temperature | Pressure | Calculation Type      | Content     |
|------------------------|--------------------|---------------|-------------|----------|-----------------------|-------------|
| Ag147ico               | vacuum             | -             | 0 K         | 0 atm    | Geometry optimization | Section 4.1 |
| Ag147cubo              | vacuum             | -             | 0 K         | 0 atm    | Geometry optimization | Section 4.1 |
| Ag147ino               | vacuum             | -             | 0 K         | 0 atm    | Geometry optimization | Section 4.1 |
| Ag147sito              | vacuum             | -             | 0 K         | 0 atm    | Geometry optimization | Section 4.1 |
| Ag201rto               | vacuum             | -             | 0 K         | 0 atm    | Geometry optimization | Section 4.1 |
| Ag147ico               | vacuum             | -             | 300 K       | 0 atm    | AIMD simulation       | Section 4.1 |
| Ag147ino               | vacuum             | -             | 300 K       | 0 atm    | AIMD simulation       | Section 4.1 |
| Ag147sito              | vacuum             | -             | 300 K       | 0 atm    | AIMD simulation       | Section 4.1 |
| Ag201rto               | vacuum             | -             | 300 K       | 0 atm    | AIMD simulation       | Section 4.1 |
| Ag147ico               | vacuum             | -             | 600 K       | 0 atm    | AIMD simulation       | Section 4.1 |
| Ag147ino               | vacuum             | -             | 600 K       | 0 atm    | AIMD simulation       | Section 4.1 |
| Ag147sito              | vacuum             | -             | 600 K       | 0 atm    | AIMD simulation       | Section 4.1 |
| Ag201rto               | vacuum             | -             | 600 K       | 0 atm    | AIMD simulation       | Section 4.1 |
| Ag147ico               | monoadsorption     | methanethiol  | 0 K         | 0 atm    | Geometry optimization | Section 4.2 |
| Ag147sito              | monoadsorption     | methanethiol  | 0 K         | 0 atm    | Geometry optimization | Section 4.2 |
| Ag201rto               | monoadsorption     | methanethiol  | 0 K         | 0 atm    | Geometry optimization | Section 4.2 |
| Ag147ico               | coadsorption       | methanethiol  | 0 K         | 0 atm    | Geometry optimization | Section 4.2 |
| Ag147sito              | coadsorption       | methanethiol  | 0 K         | 0 atm    | Geometry optimization | Section 4.2 |
| Ag201rto               | coadsorption       | methanethiol  | 0 K         | 0 atm    | Geometry optimization | Section 4.2 |
| Gaseous N <sub>2</sub> | gas                | dinitrogen    | 0 K         | 5 atm    | Geometry optimization | Section 4.2 |
| Gaseous N <sub>2</sub> | gas                | dinitrogen    | 300 K       | 5 atm    | AIMD simulation       | Section 4.2 |
| Gaseous N <sub>2</sub> | gas                | dinitrogen    | 0 K         | 5 atm    | Quenching             | Section 4.2 |
| Ag147ico               | gas + coadsorption | methanethiol  | 0 K         | 5 atm    | Geometry optimization | Section 4.2 |
| Ag147sito              | gas + coadsorption | methanethiol  | 0 K         | 5 atm    | Geometry optimization | Section 4.2 |
| Ag201rto               | gas + coadsorption | methanethiol  | 0 K         | 5 atm    | Geometry optimization | Section 4.2 |
| Ag147ico               | gas + coadsorption | methanethiol  | 300 K       | 5 atm    | AIMD simulation       | Section 4.3 |
| Ag147sito              | gas + coadsorption | methanethiol  | 300 K       | 5 atm    | AIMD simulation       | Section 4.3 |
| Ag201rto               | gas + coadsorption | methanethiol  | 300 K       | 5 atm    | AIMD simulation       | Section 4.3 |
| Ag147ico               | gas + coadsorption | methanethiol  | 0 K         | 5 atm    | Multiple quenches     | Section 4.3 |
| Ag147sito              | gas + coadsorption | methanethiol  | 0 K         | 5 atm    | Multiple quenches     | Section 4.3 |
| Ag201rto               | gas + coadsorption | methanethiol  | 0 K         | 5 atm    | Multiple quenches     | Section 4.3 |
| Ag147ico               | coadsorption       | methanethiol  | 0 K         | 0 atm    | Multiple quenches     | Section 4.3 |
| Ag147sito              | coadsorption       | methanethiol  | 0 K         | 0 atm    | Multiple quenches     | Section 4.3 |
| Ag201rto               | coadsorption       | methanethiol  | 0 K         | 0 atm    | Multiple quenches     | Section 4.3 |

Table S1. Summary of all the considered systems and computational conditions for exploring the environment effects on Ag NPs.

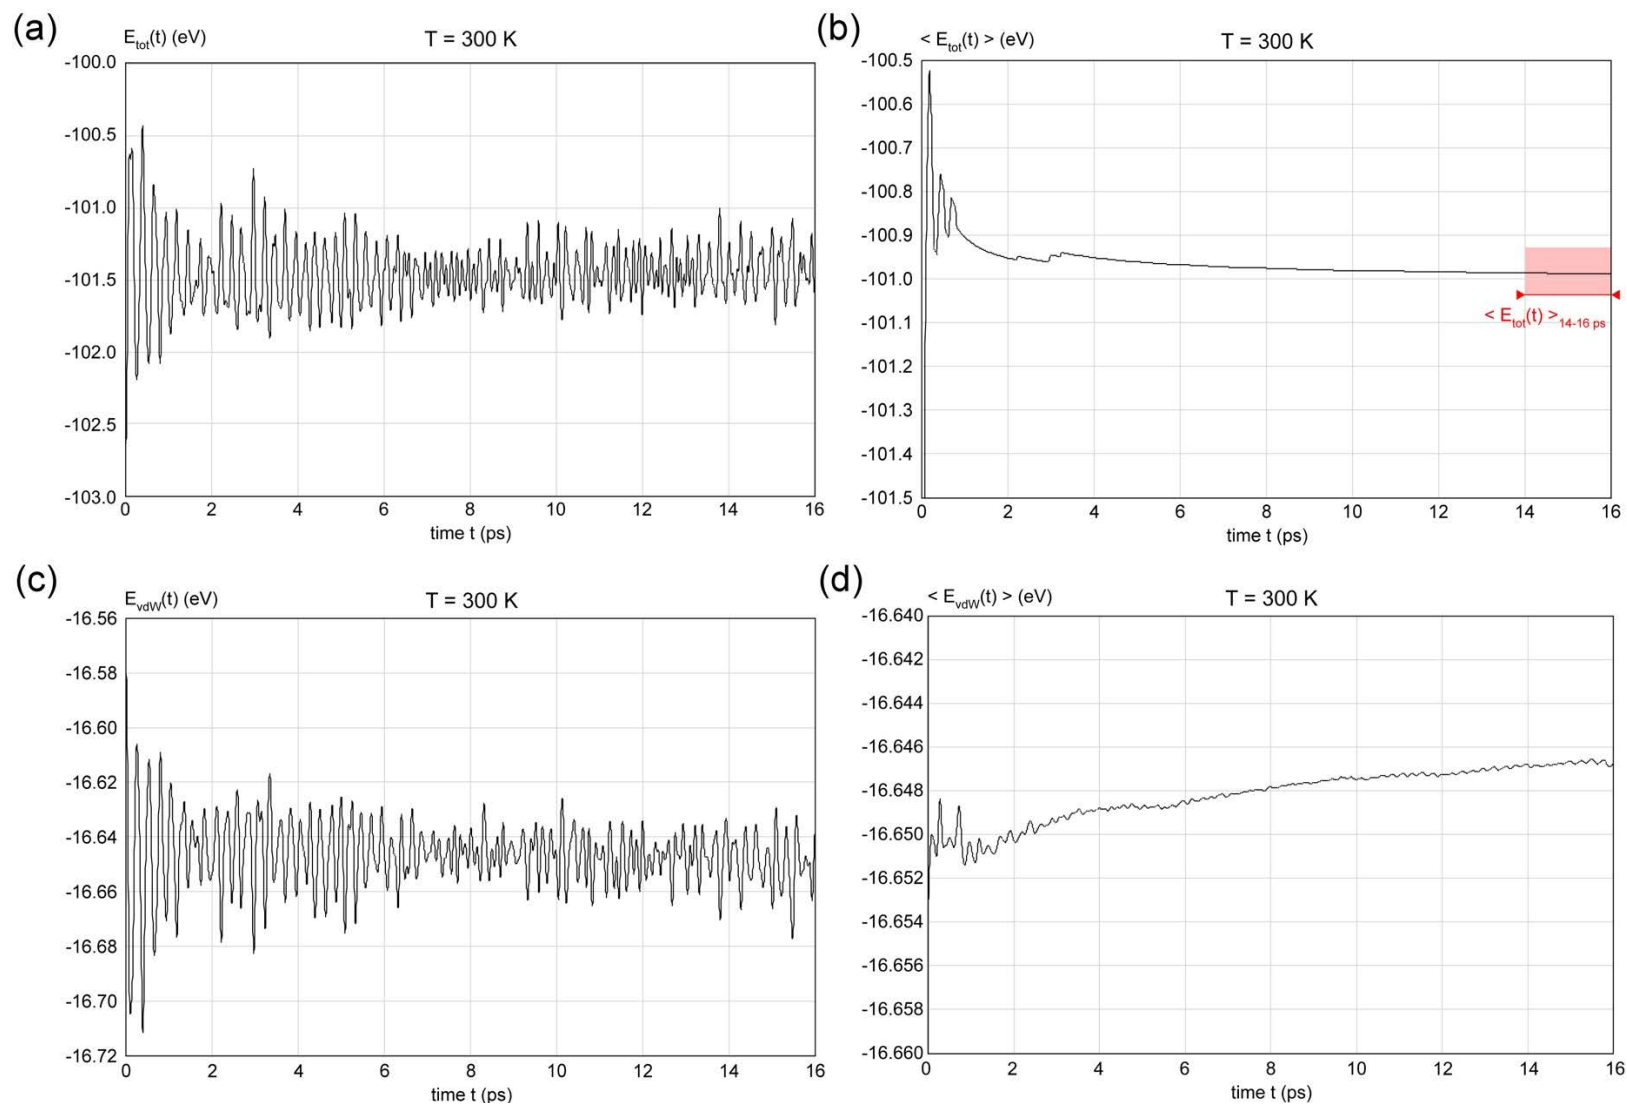

Figure S1. **[Ag Bulk]** AIMD simulation at 300 K of Ag bulk modeled by a 3D box containing 32 atoms: (a) total electronic energy  $E_{\text{tot}}$  (eV) plotted against time ( $t$ ) in ps; (b) current average total electronic energy  $\langle E_{\text{tot}} \rangle$  (eV) against time (averaged value over the last 2 ps for determining the stability); (c) total van der Waals dispersion energy  $E_{\text{vdW}}$  (eV) against time; (d) current average total van der Waals dispersion energy  $\langle E_{\text{vdW}} \rangle$  (eV) against time.

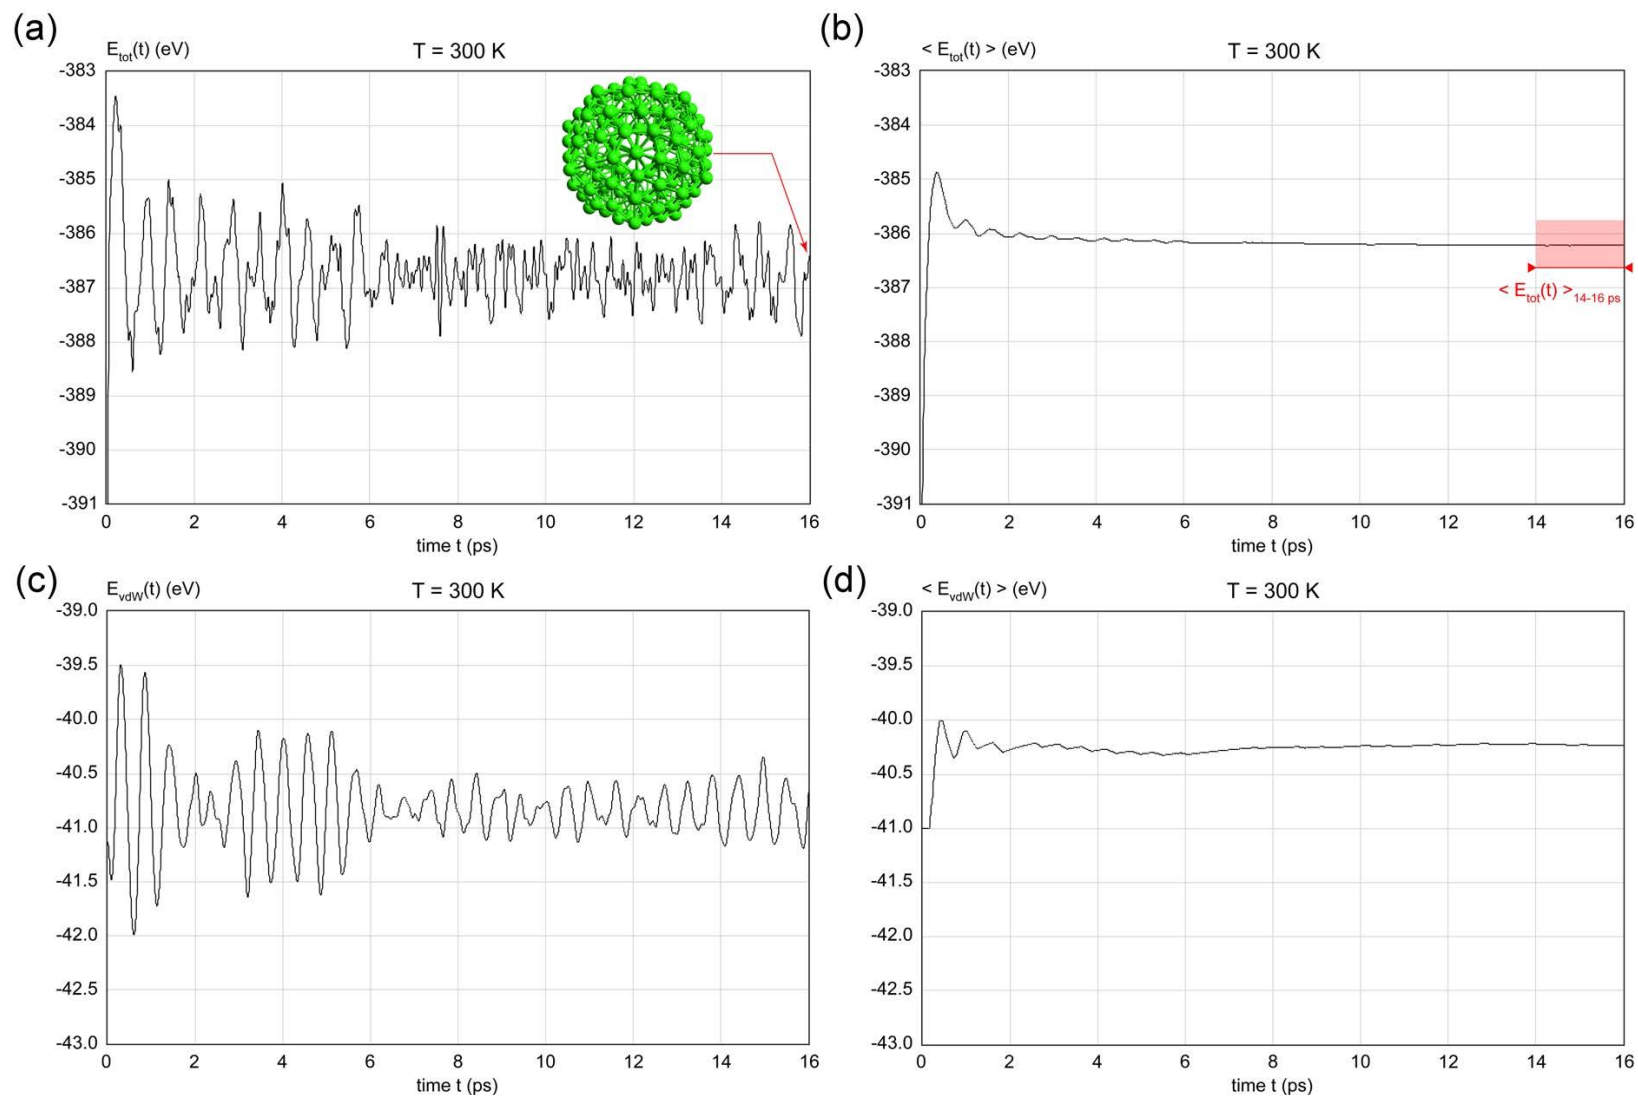

Figure S2. [Ag<sub>147</sub>ico] AIMD simulation at 300 K of Ag<sub>147</sub>ico nanocluster in vacuum: (a) total electronic energy  $E_{\text{tot}}$  (eV) plotted against time ( $t$ ) in ps (a snapshot corresponding to the Ag<sub>147</sub>ico structure at the end of the MD trajectory is reported); (b) current average total electronic energy  $\langle E_{\text{tot}} \rangle$  (eV) against time (averaged value over the last 2 ps for determining the stability); (c) total van der Waals dispersion energy  $E_{\text{vdW}}$  (eV) against time; (d) current average total van der Waals dispersion energy  $\langle E_{\text{vdW}} \rangle$  (eV) against time.

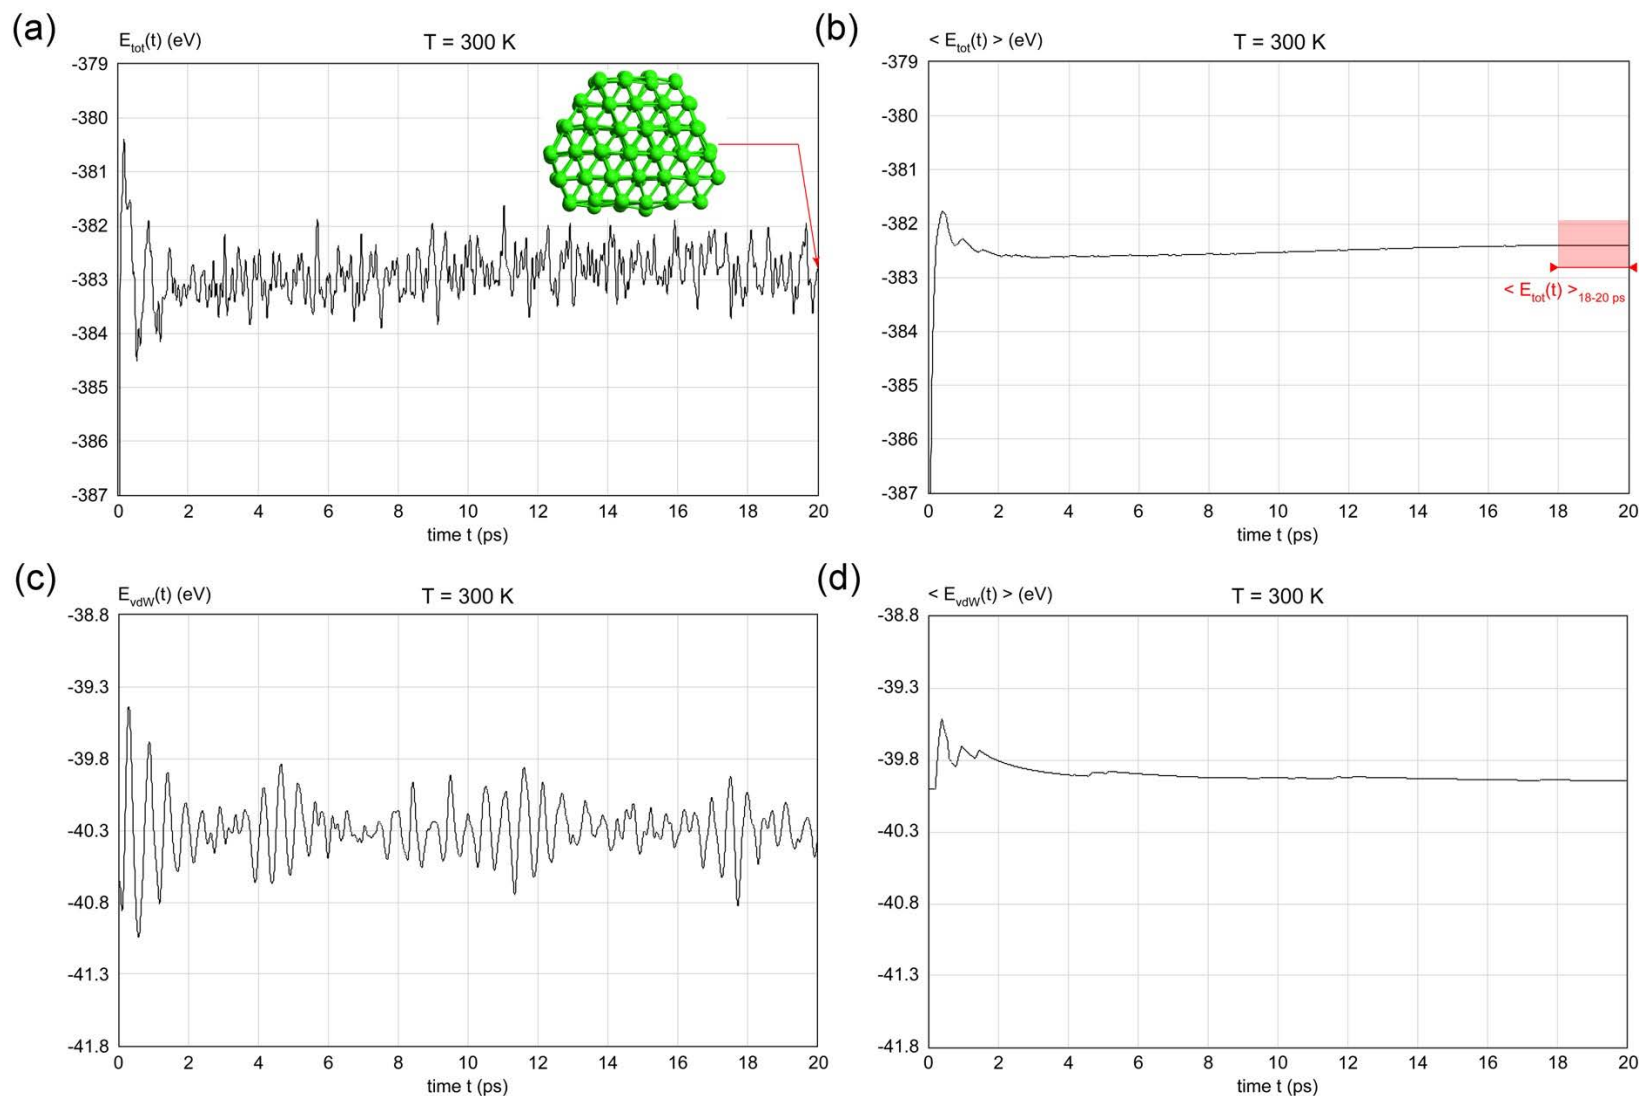

Figure S3. [Ag<sub>147</sub>sito] AIMD simulation at 300 K of Ag<sub>147</sub>sito nanocluster in vacuum: (a) total electronic energy  $E_{\text{tot}}$  (eV) plotted against time ( $t$ ) in ps (a snapshot corresponding to the Ag<sub>147</sub>sito structure at the end of the MD trajectory is reported); (b) current average total electronic energy  $\langle E_{\text{tot}} \rangle$  (eV) against time (averaged value over the last 2 ps for determining the stability); (c) total van der Waals dispersion energy  $E_{\text{vdW}}$  (eV) against time; (d) current average total van der Waals dispersion energy  $\langle E_{\text{vdW}} \rangle$  (eV) against time.

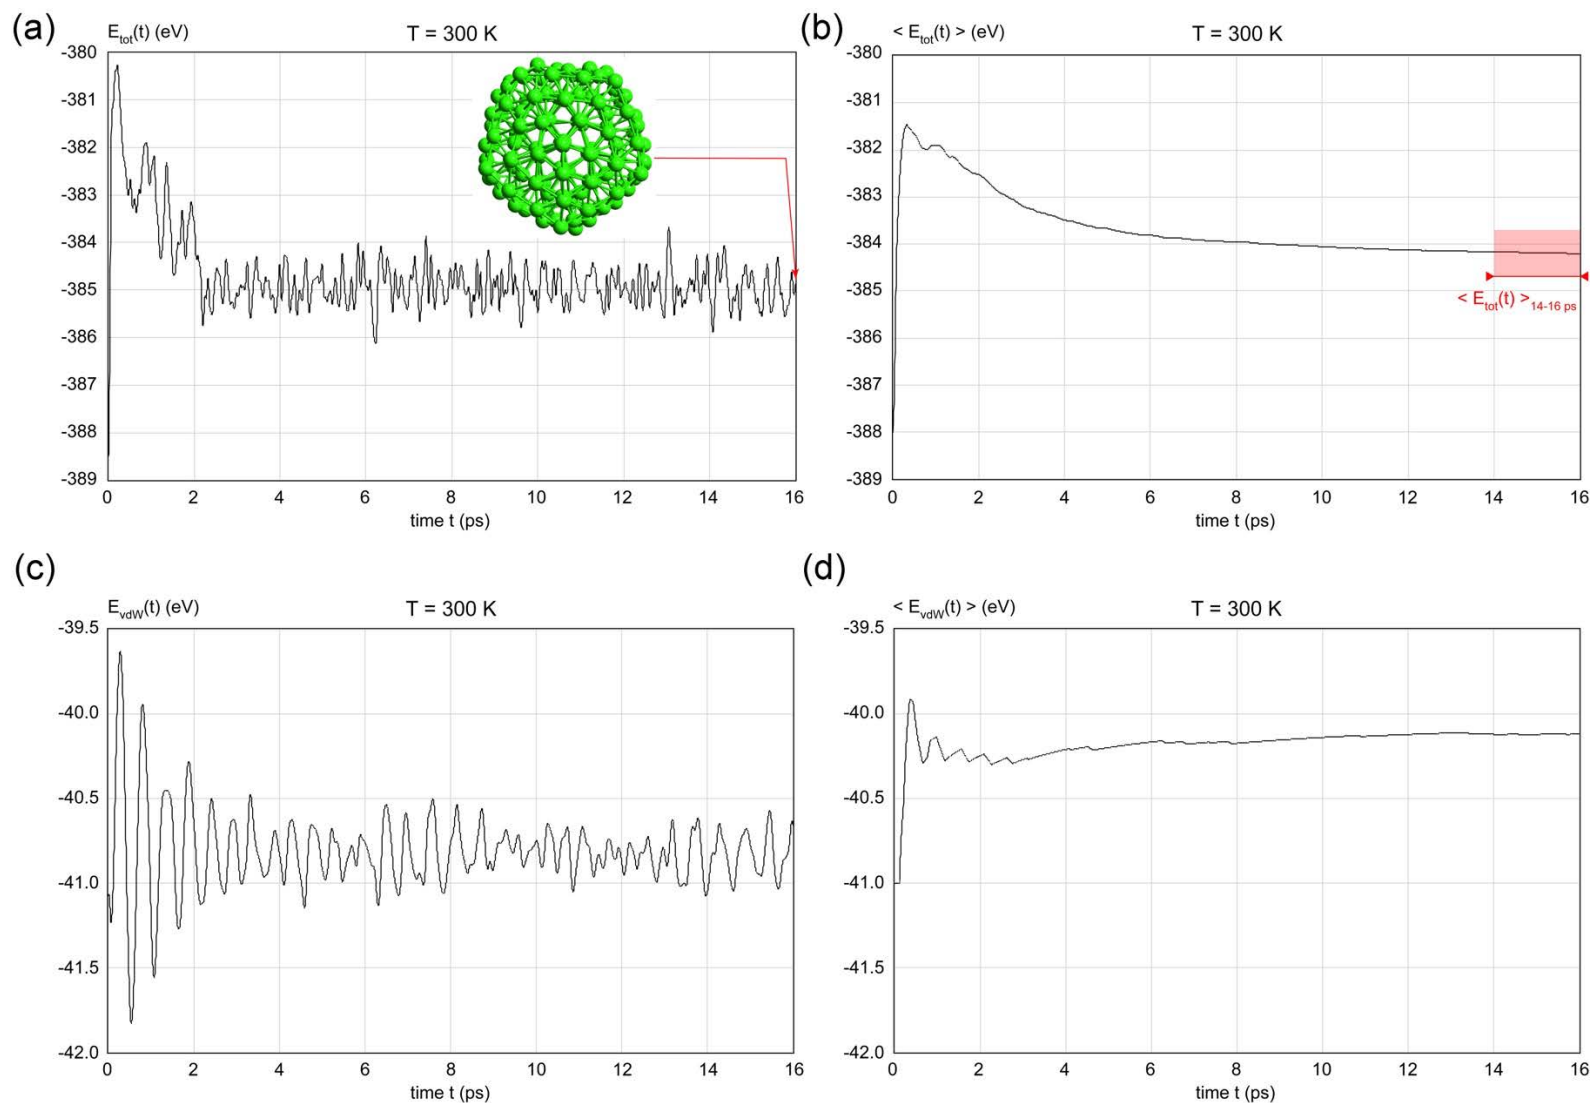

Figure S4. [Ag<sub>147</sub>ino] AIMD simulation at 300 K of Ag<sub>147</sub>ino nanocluster in vacuum: (a) total electronic energy  $E_{\text{tot}}$  (eV) plotted against time ( $t$ ) in ps (a snapshot corresponding to the structure at the end of the MD trajectory is reported); (b) current average total electronic energy  $\langle E_{\text{tot}} \rangle$  (eV) against time (averaged value over the last 2 ps for determining the stability); (c) total van der Waals dispersion energy  $E_{\text{vdW}}$  (eV) against time; (d) current average total van der Waals dispersion energy  $\langle E_{\text{vdW}} \rangle$  (eV) against time.

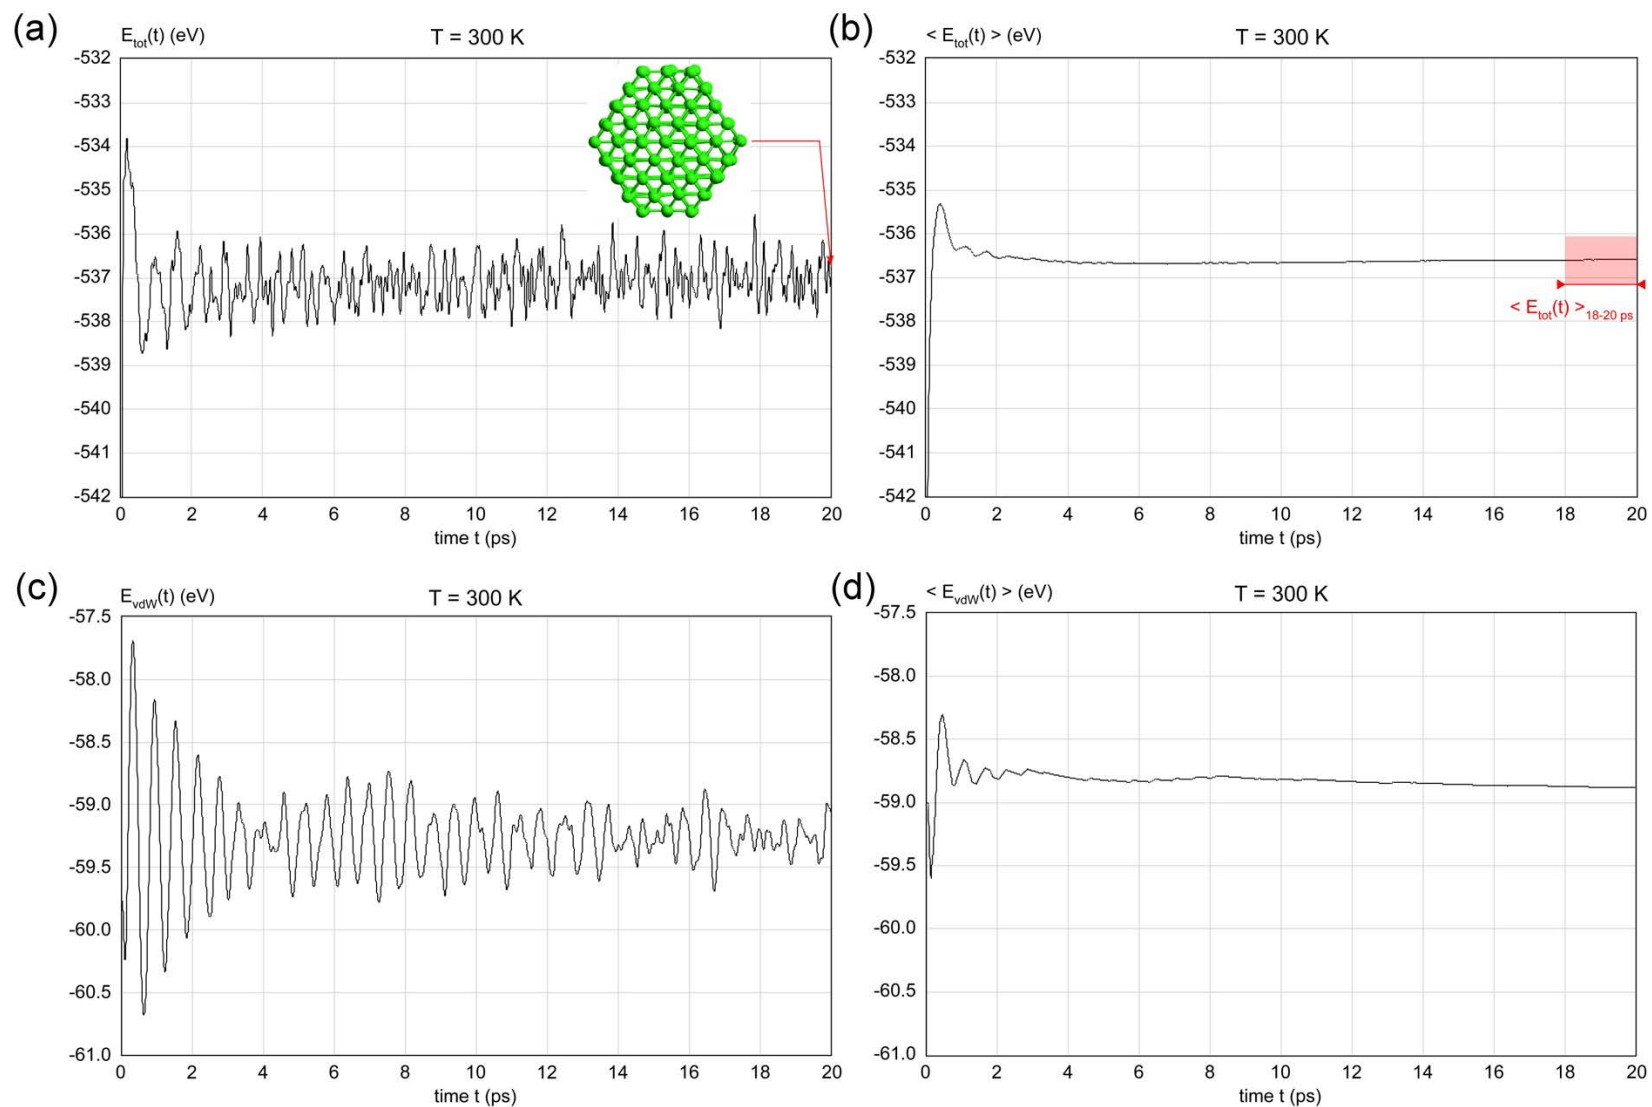

Figure S5. [Ag<sub>201</sub>rto] AIMD simulation at 300 K of Ag<sub>201</sub>rto nanocluster in vacuum: (a) total electronic energy  $E_{\text{tot}}$  (eV) plotted against time ( $t$ ) in ps (a snapshot corresponding to the Ag<sub>201</sub>rto structure at the end of the MD trajectory is reported); (b) current average total electronic energy  $\langle E_{\text{tot}} \rangle$  (eV) against time (averaged value over the last 2 ps for determining the stability); (c) total van der Waals dispersion energy  $E_{\text{vdW}}$  (eV) against time; (d) current average total van der Waals dispersion energy  $\langle E_{\text{vdW}} \rangle$  (eV) against time.

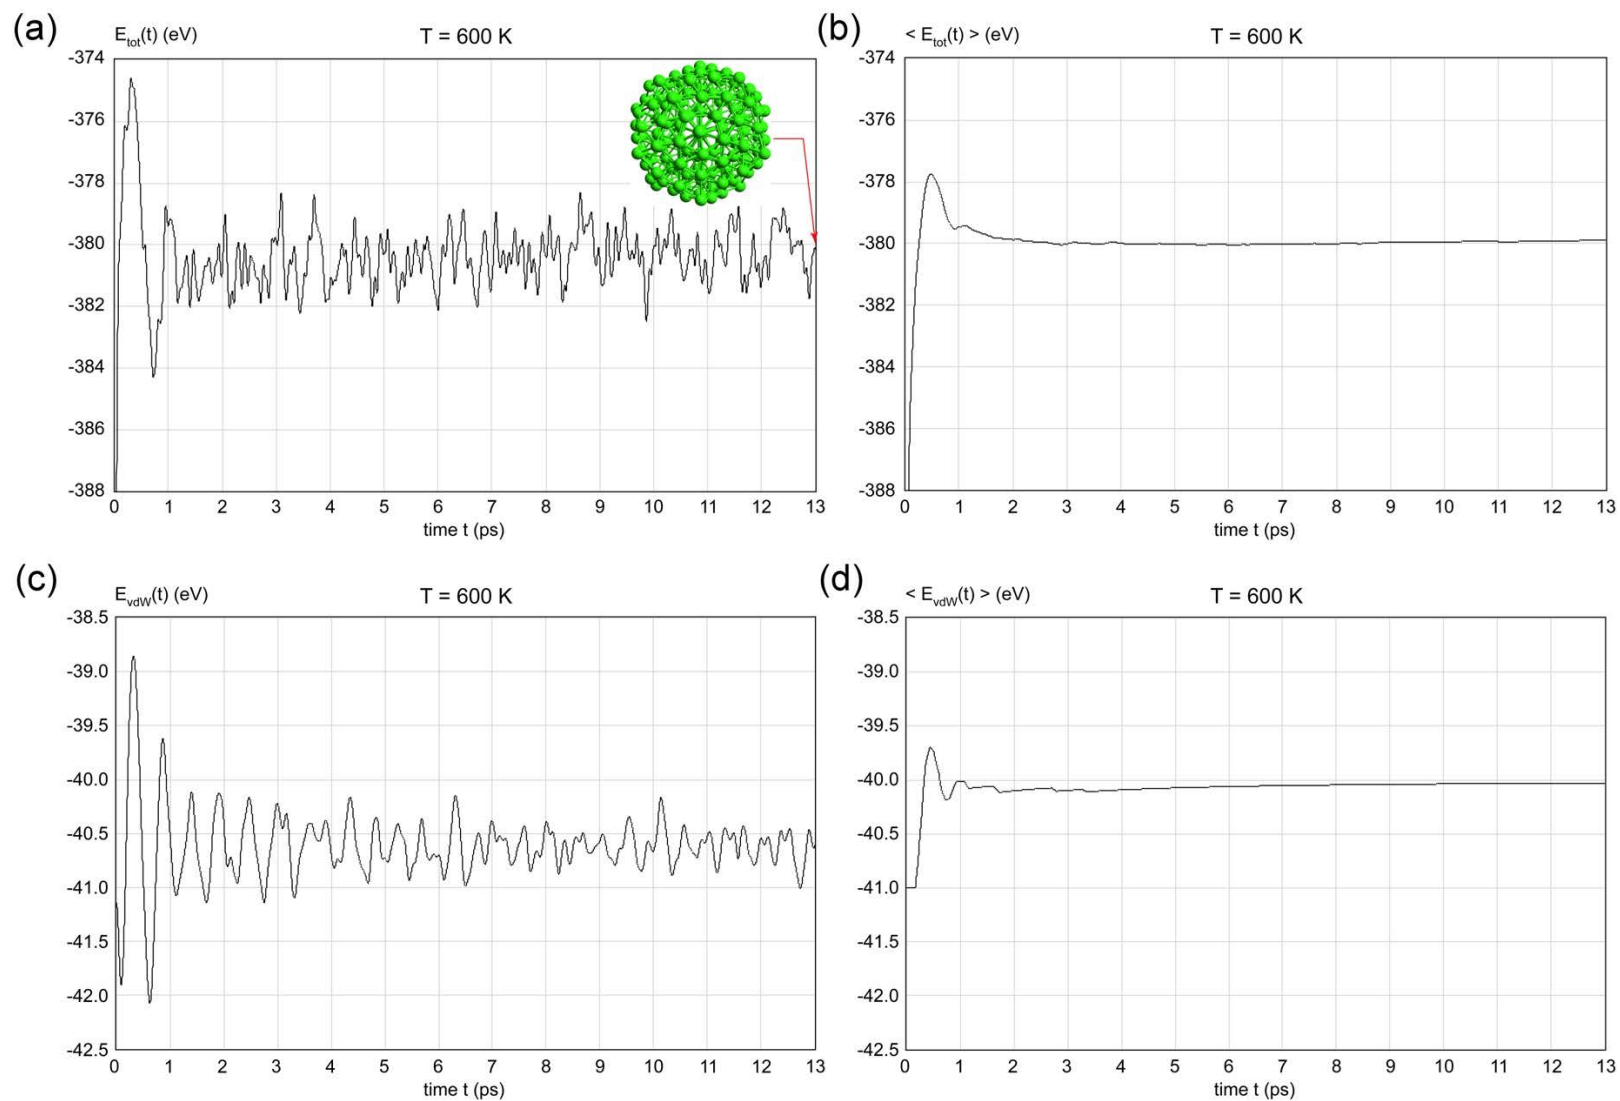

Figure S6. [Ag<sub>147</sub>ico] AIMD simulation at 600 K of Ag<sub>147</sub>ico nanocluster in vacuum: (a) total electronic energy  $E_{\text{tot}}$  (eV) plotted against time ( $t$ ) in ps (a snapshot corresponding to the Ag<sub>147</sub>ico structure at the end of the MD trajectory is reported); (b) current average total electronic energy  $\langle E_{\text{tot}} \rangle$  (eV) against time; (c) total van der Waals dispersion energy  $E_{\text{vdW}}$  (eV) against time; (d) current average total van der Waals dispersion energy  $\langle E_{\text{vdW}} \rangle$  (eV) against time.



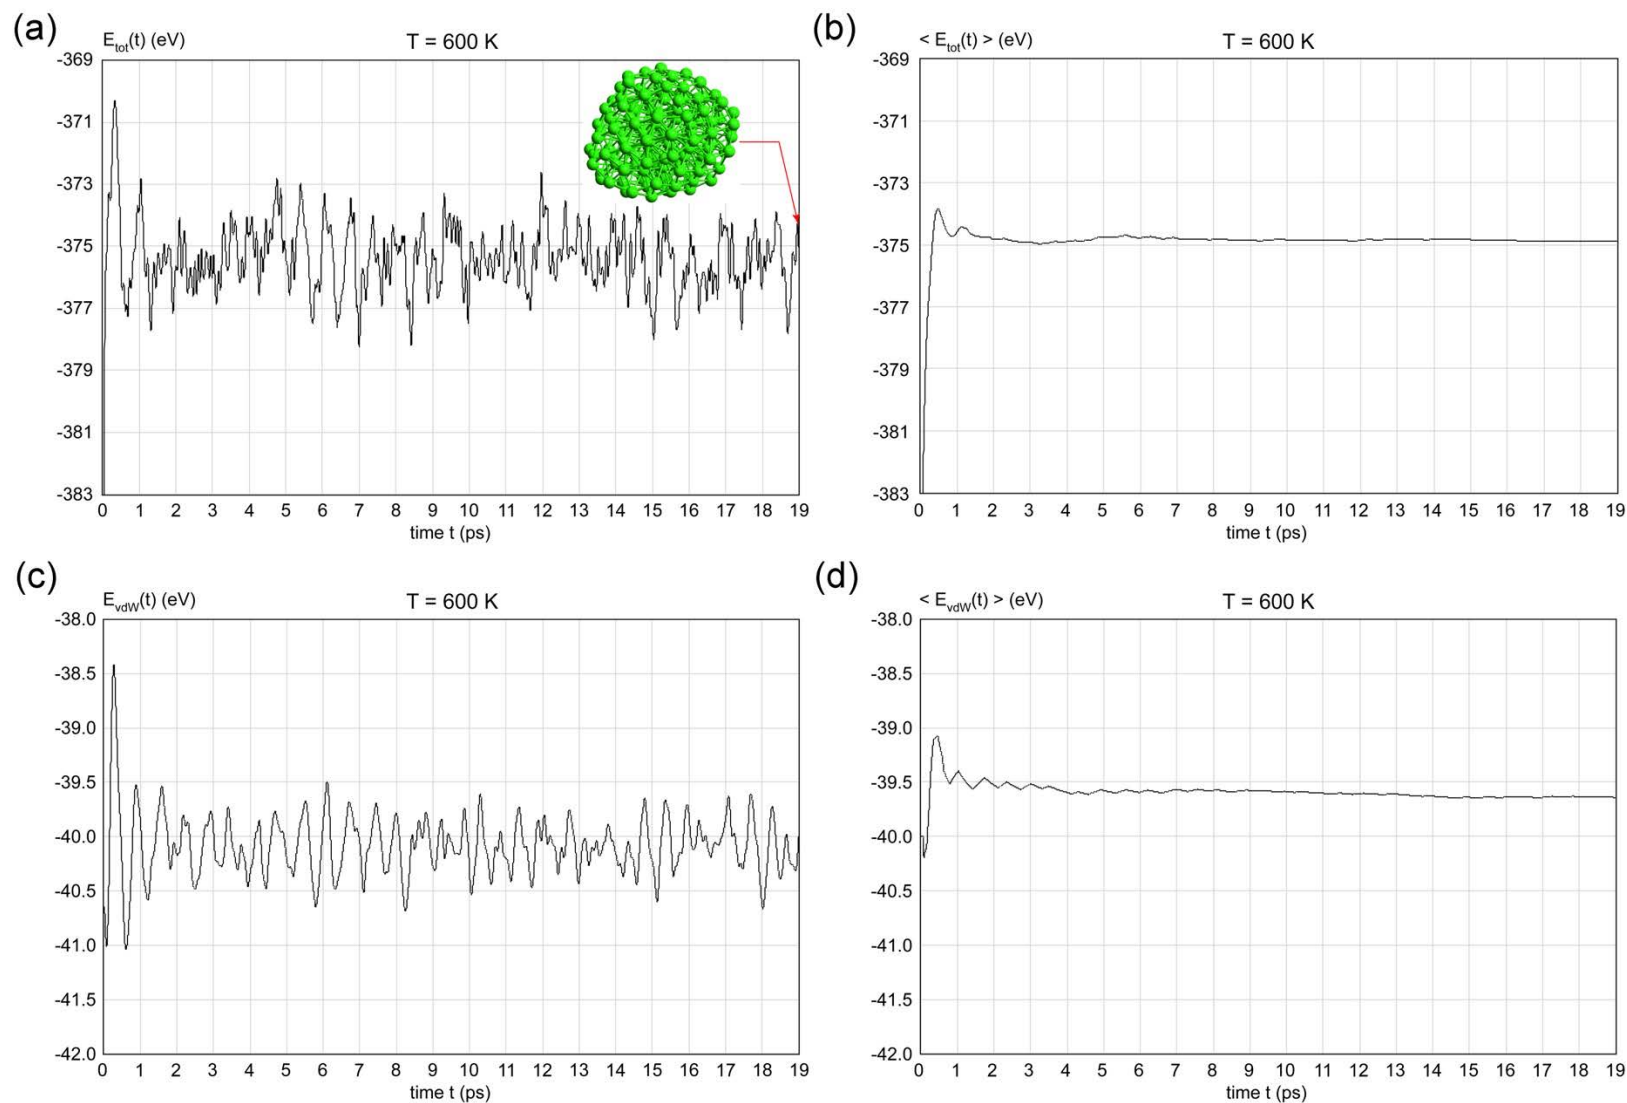

Figure S7. [Ag<sub>147</sub>sito] AIMD simulation at 600 K of Ag<sub>147</sub>sito nanocluster in vacuum: (a) total electronic energy  $E_{\text{tot}}$  (eV) plotted against time ( $t$ ) in ps (a snapshot corresponding to the structure at the end of the MD trajectory is reported); (b) current average total electronic energy  $\langle E_{\text{tot}} \rangle$  (eV) against time; (c) total van der Waals dispersion energy  $E_{\text{vdW}}$  (eV) against time; (d) current average total van der Waals dispersion energy  $\langle E_{\text{vdW}} \rangle$  (eV) against time.

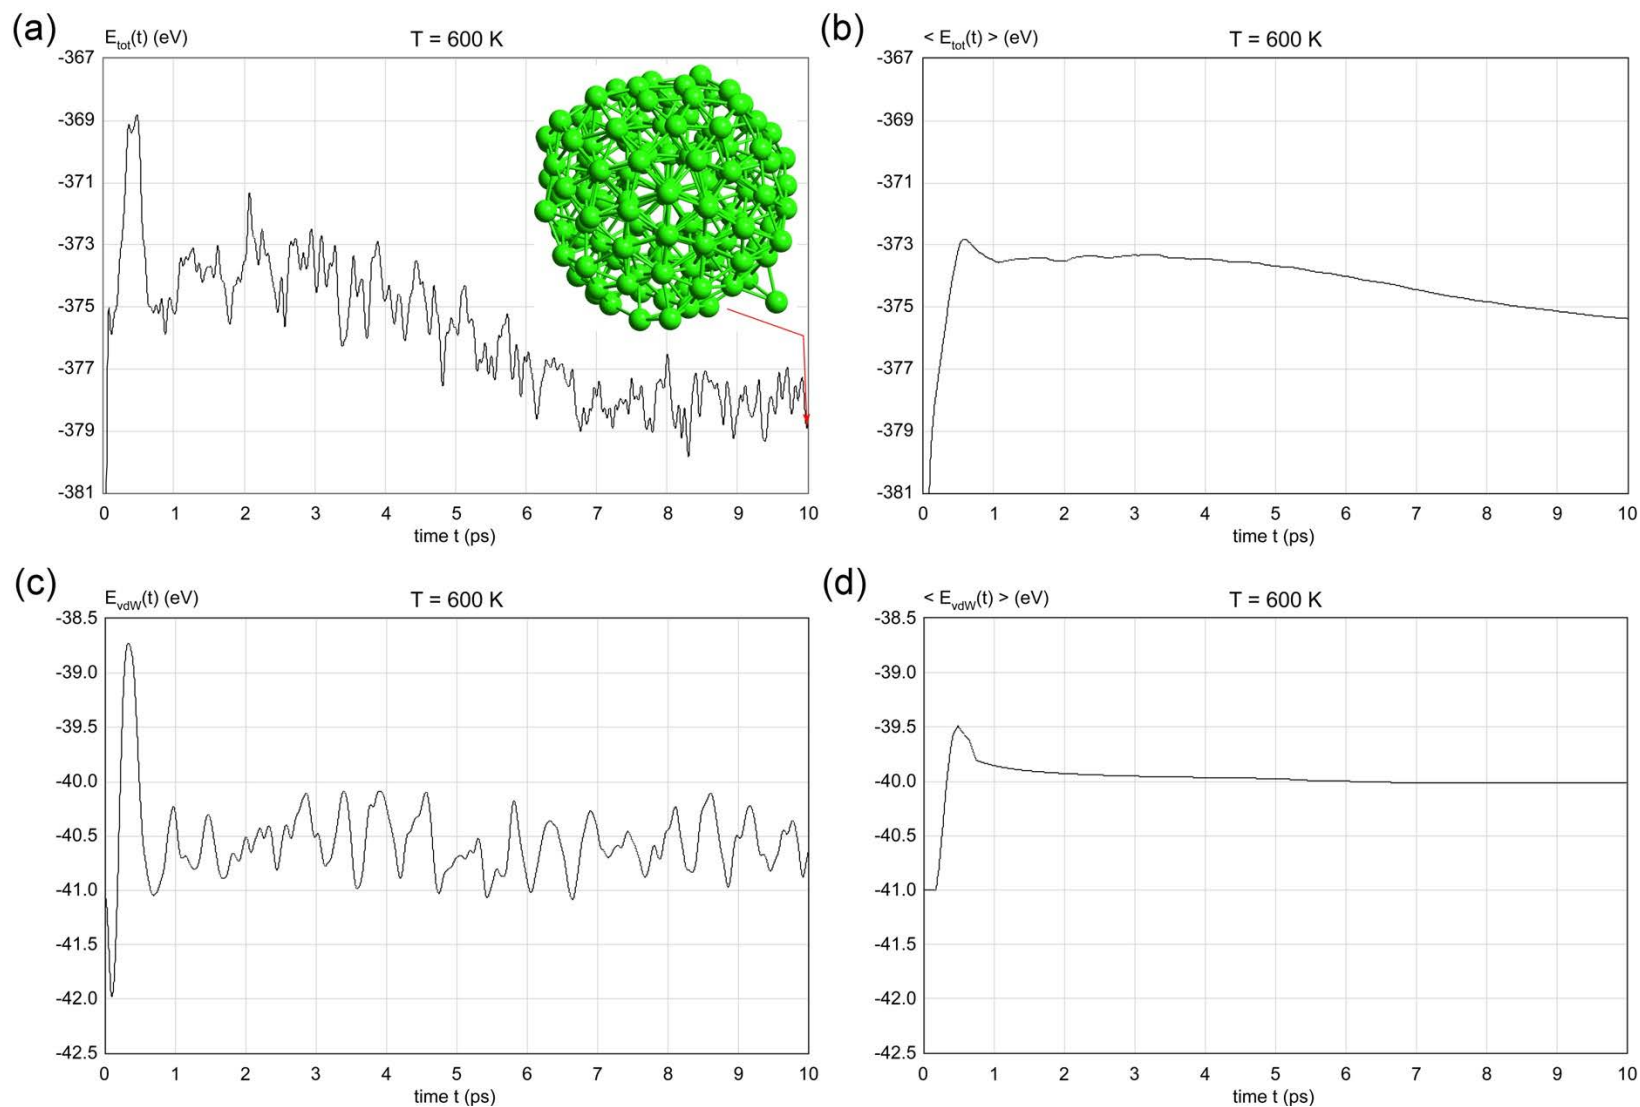

Figure S8. [Ag<sub>147</sub>ino] AIMD simulation at 600 K of Ag<sub>147</sub>ino nanocluster in vacuum: (a) total electronic energy  $E_{\text{tot}}$  (eV) plotted against time ( $t$ ) in ps (a snapshot corresponding to the structure at the end of the MD trajectory is reported); (b) current average total electronic energy  $\langle E_{\text{tot}} \rangle$  (eV) against time; (c) total van der Waals dispersion energy  $E_{\text{vdW}}$  (eV) against time; (d) current average total van der Waals dispersion energy  $\langle E_{\text{vdW}} \rangle$  (eV) against time.

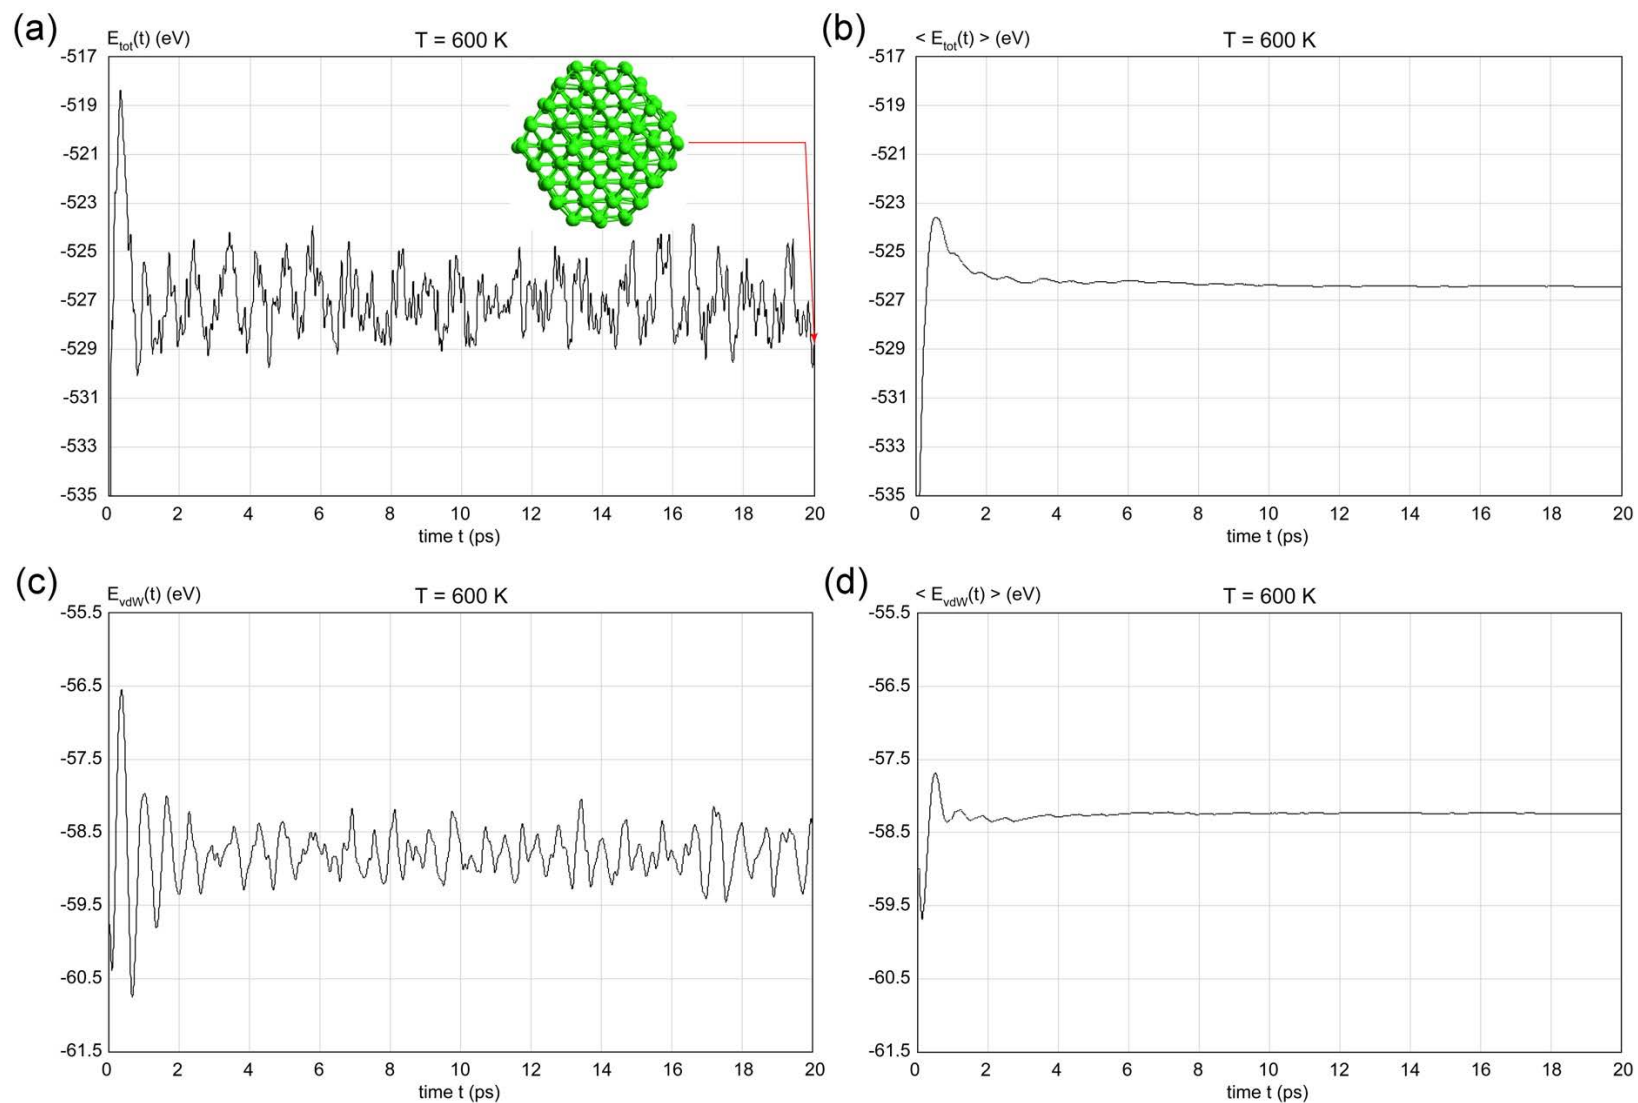

Figure S9. [Ag<sub>201</sub>rto] AIMD simulation at 600 K of Ag<sub>201</sub>rto nanocluster in vacuum: (a) total electronic energy  $E_{\text{tot}}$  (eV) plotted against time (t) in ps (a snapshot corresponding to the Ag<sub>201</sub>rto structure at the end of the MD trajectory is reported); (b) current average total electronic energy  $\langle E_{\text{tot}} \rangle$  (eV) against time; (c) total van der Waals dispersion energy  $E_{\text{vdW}}$  (eV) against time; (d) current average total van der Waals dispersion energy  $\langle E_{\text{vdW}} \rangle$  (eV) against time.

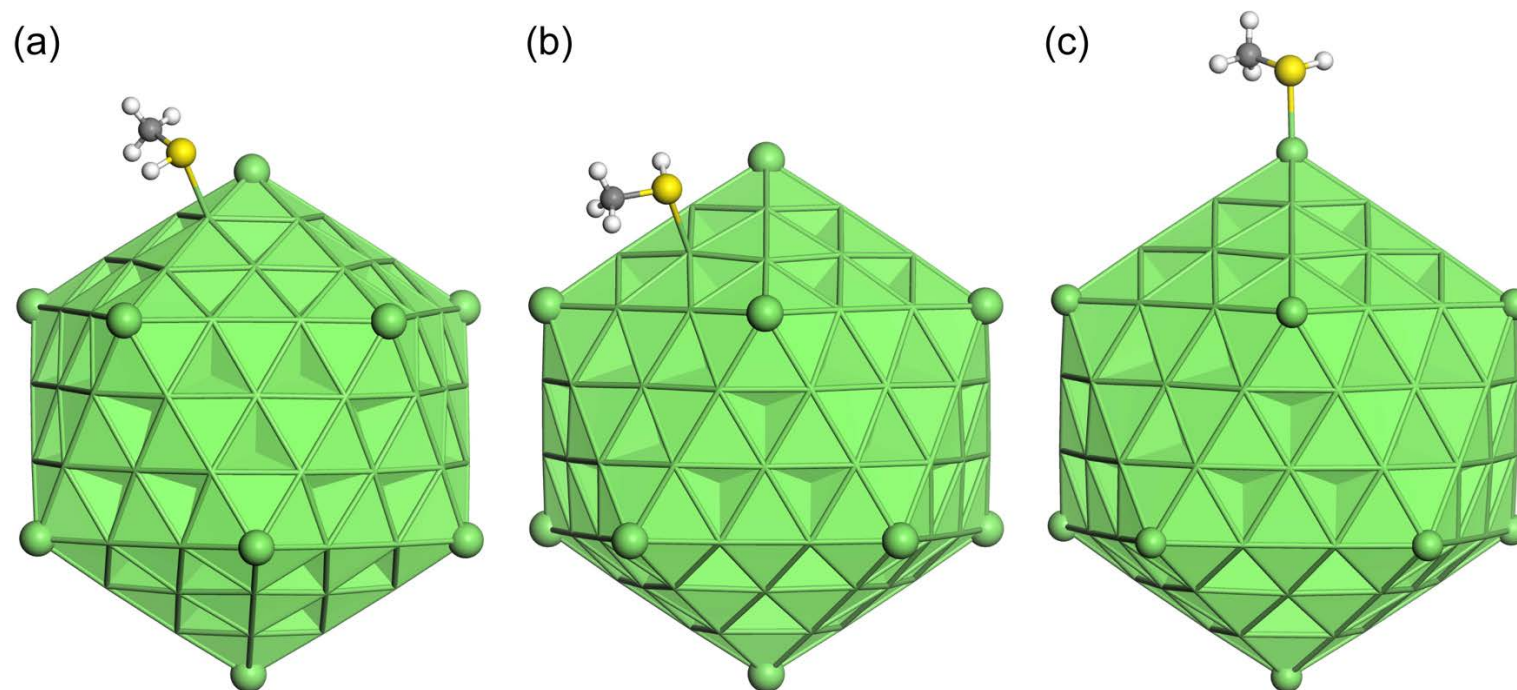

Figure S10. [**Ag<sub>147</sub>ico**] Monoadsorption of one methanethiol molecule on the Ag<sub>147</sub>ico nanocluster in vacuum at various adsorption sites: optimized structures on (a) edge, (b) (111) facet, (c) vertex (see Table 1 of article for adsorption energies). The color labels are green for Ag, yellow for S, gray for C and white for H atoms.

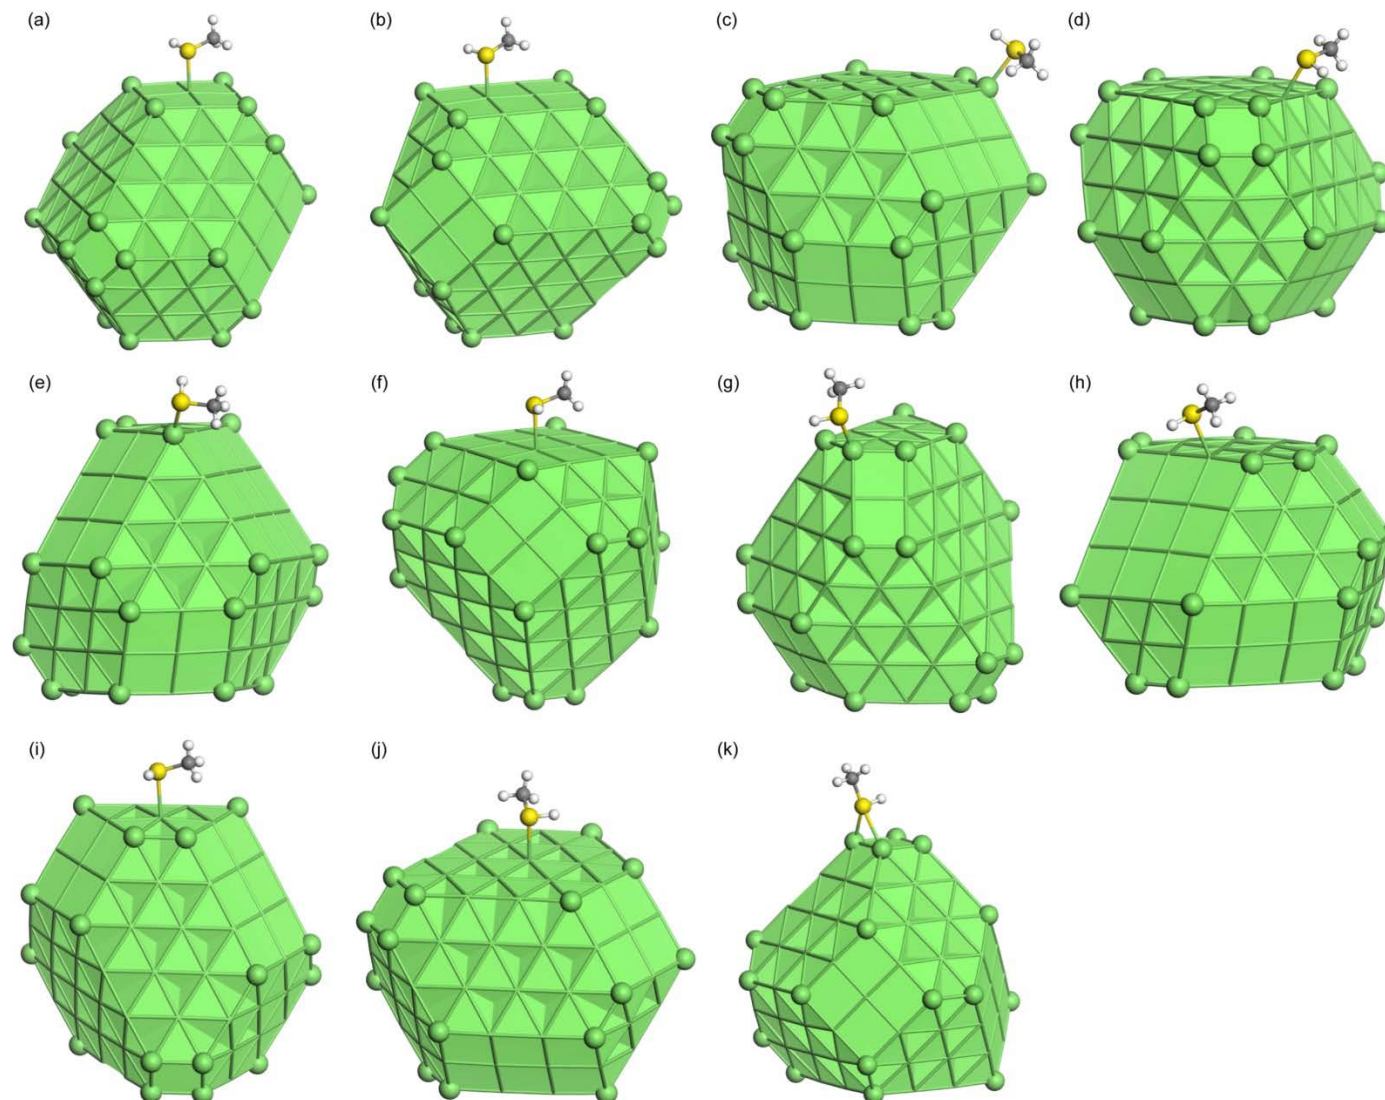

Figure S11. [**Ag147sito**] Mono-adsorption of one methanethiol molecule on the Ag147sito nanocluster in vacuum at various adsorption sites: optimized structures on (a) (100) facet of 9 atoms, (b) (100) facet of 12 atoms, (c) vertex (neighbor of 1 vertex), (d) edge (111|111), (e) vertex, (f) (100) facet of 16 atoms, (g) vertex (neighbor of 2 vertices), (h) edge (111|100), (i) (111) facet of 9 atoms, (j) (111) facet of 21 atoms, (k) bridge position (see Table 1 of article for adsorption energies). The color labels are green for Ag, yellow for S, gray for C and white for H atoms.



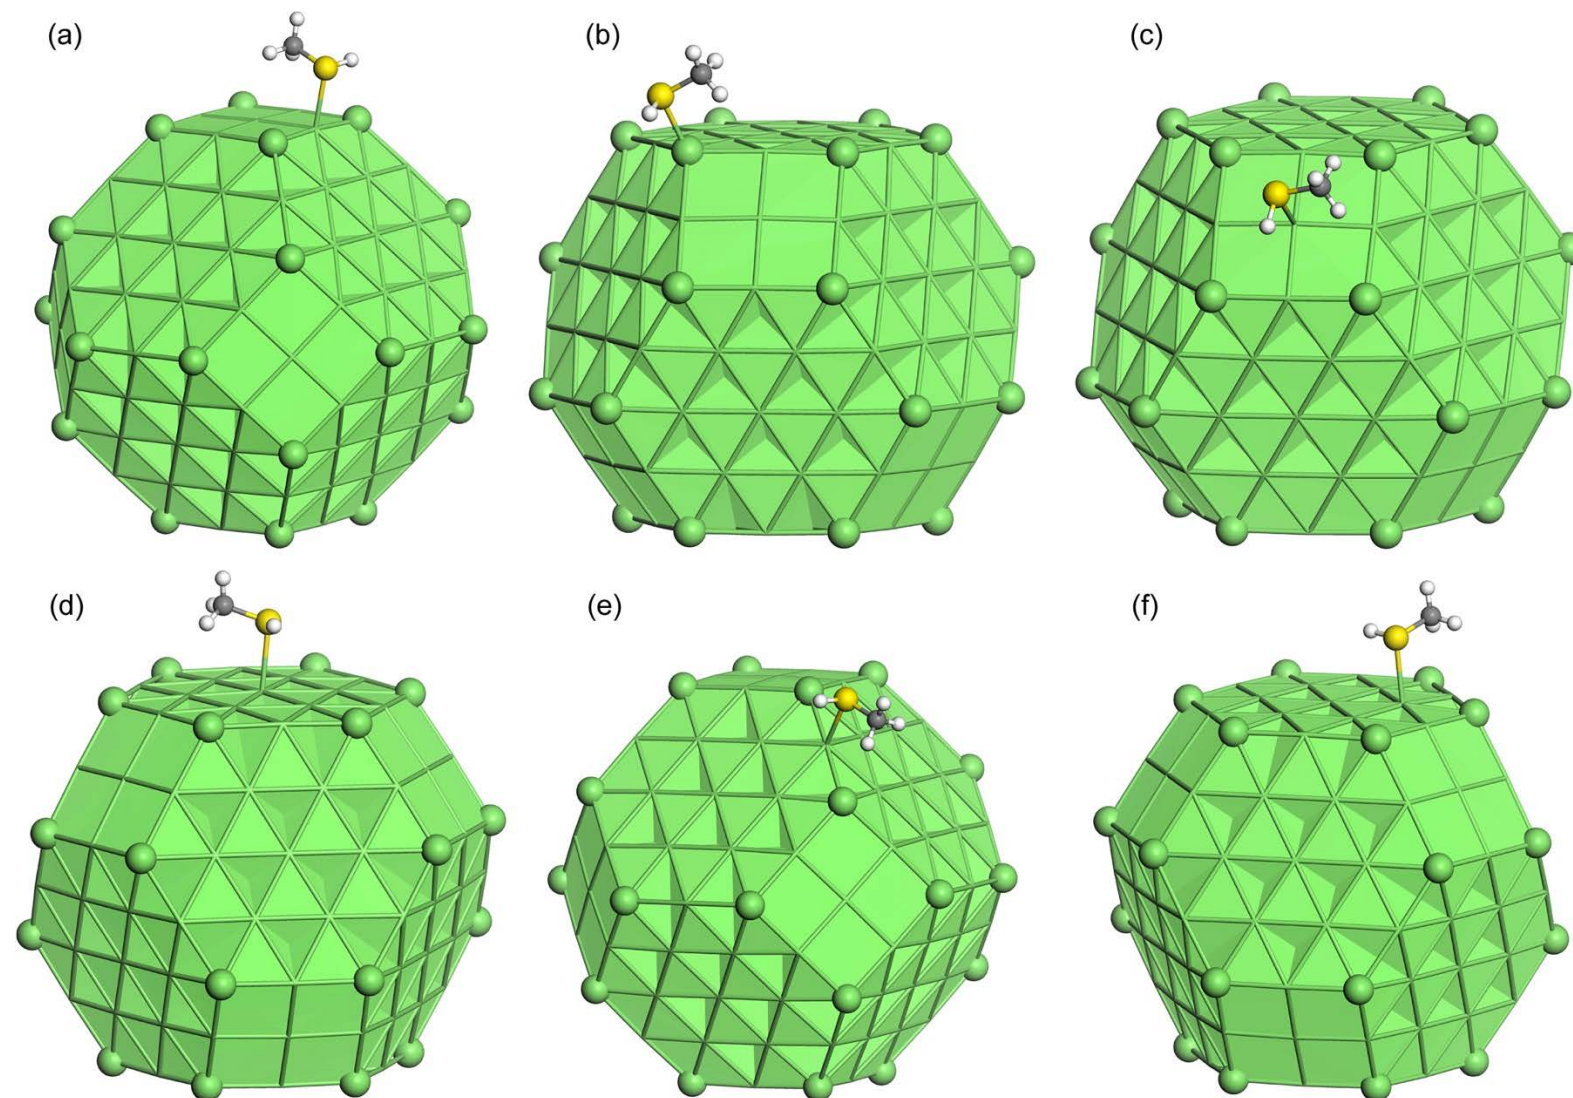

Figure S12. [**Ag201rto**] Monoadsorption of one methanethiol molecule on the Ag201rto nanocluster in vacuum at various adsorption sites: optimized structures on (a) edge (111|100), (b) vertex, (c) (100) facet, (d) (111) facet (center), (e) edge (111|111), (f) (111) facet (middle layer) (see Table 1 of article for adsorption energies). The color labels are green for Ag, yellow for S, gray for C and white for H atoms.

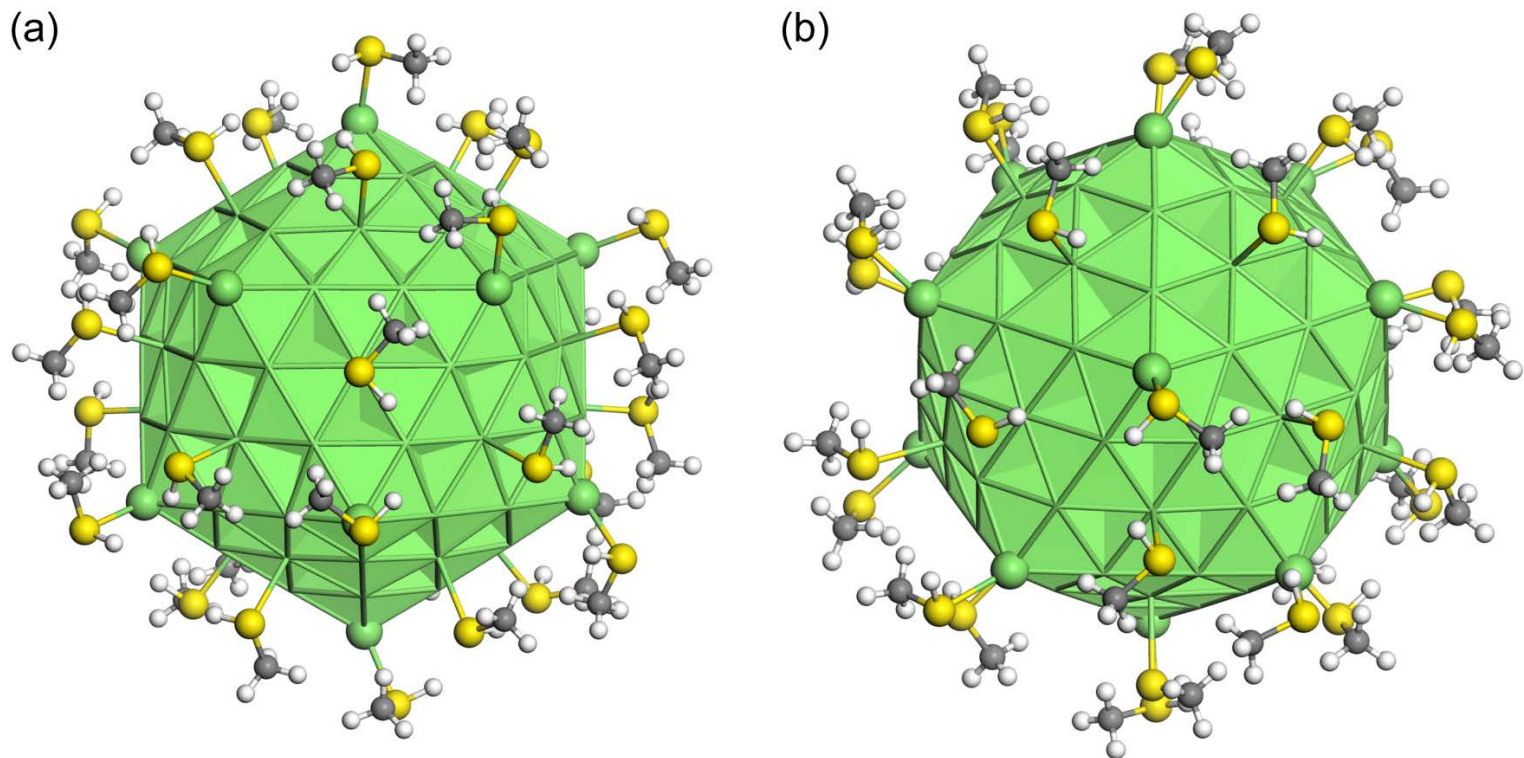

Figure S13. [**Ag147ico**] A shell of 32 methanethiol molecules (coadsorption 1) on the Ag<sub>147</sub>ico nanocluster in vacuum: (a) lateral and (b) top views of the optimized structure (see Table 2 of article for more details about molecule surface density, coverage and energetics). The color labels are green for Ag, yellow for S, gray for C and white for H atoms.

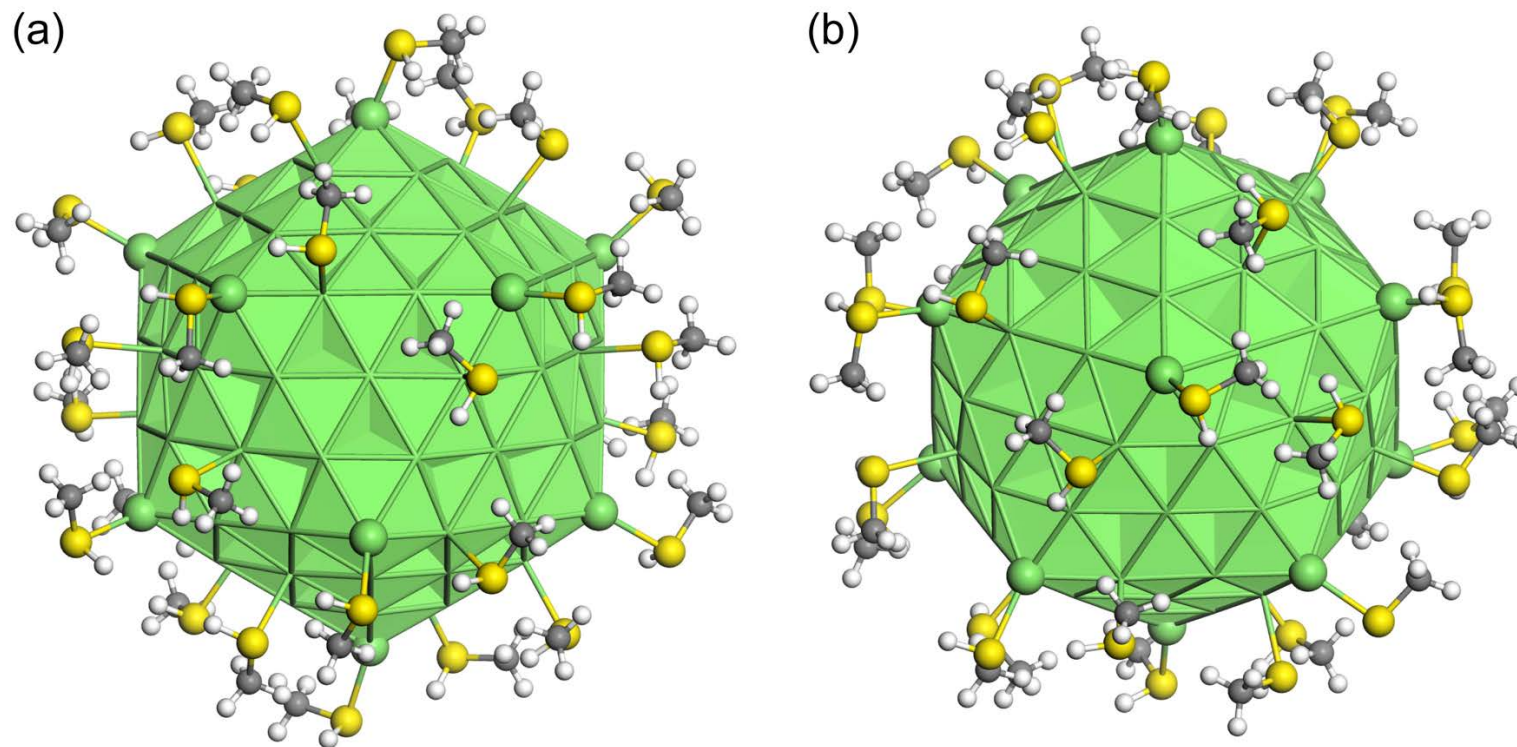

Figure S14. [**Ag<sub>147</sub>ico**] A shell of 32 methanethiol molecules (coadsorption 2) on the Ag<sub>147</sub>ico nanocluster in vacuum: (a) lateral and (b) top views of the optimized structure (see Table 2 of article for more details about molecule surface density, coverage and energetics). The color labels are green for Ag, yellow for S, gray for C and white for H atoms.



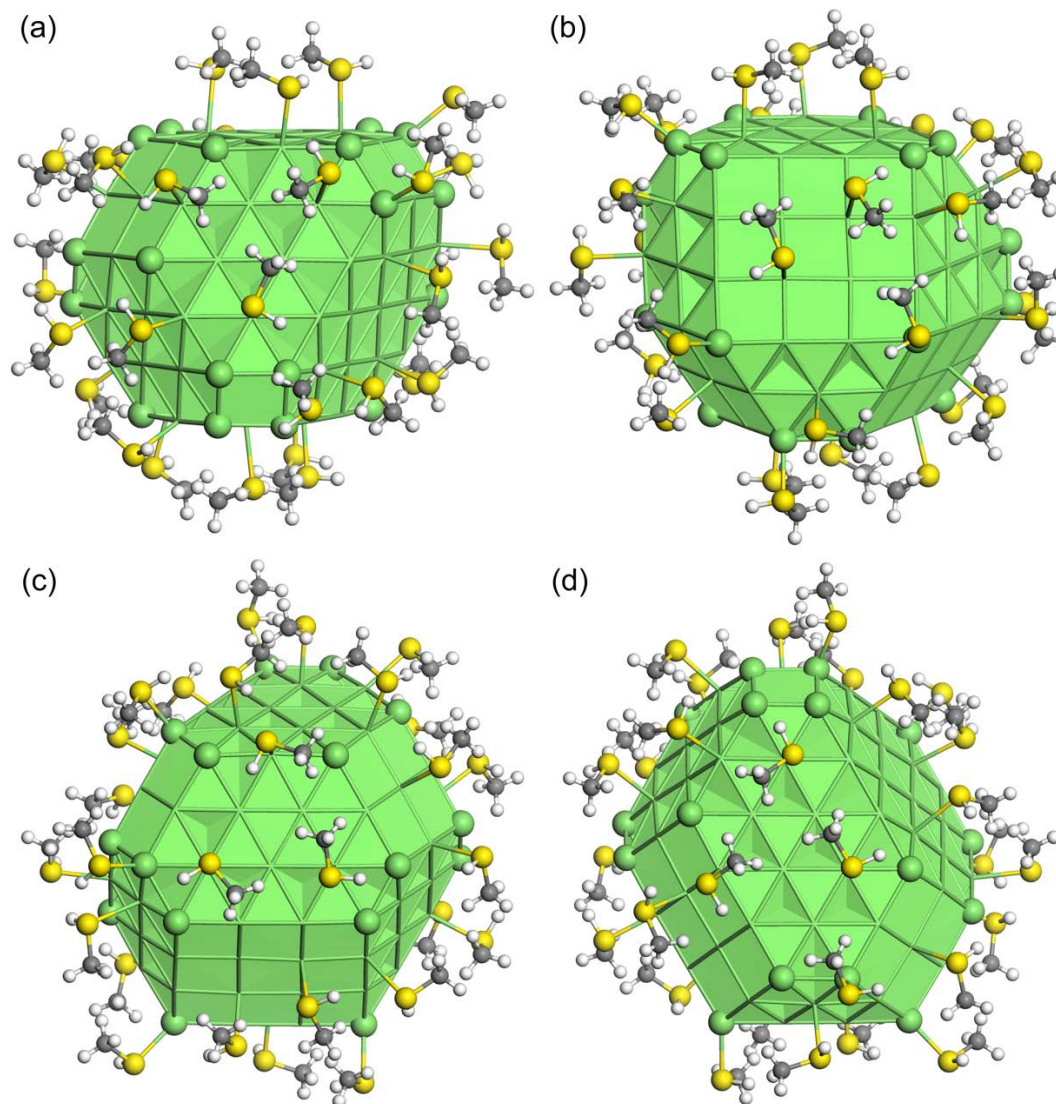

Figure S15. **[Ag<sub>147</sub>sito]** A shell of 32 methanethiol molecules on the Ag<sub>147</sub>sito nanocluster in vacuum: (a-d) several views of the optimized structure (see Table 2 of article for more details about molecule surface density, coverage and energetics). The color labels are green for Ag, yellow for S, gray for C and white for H atoms.

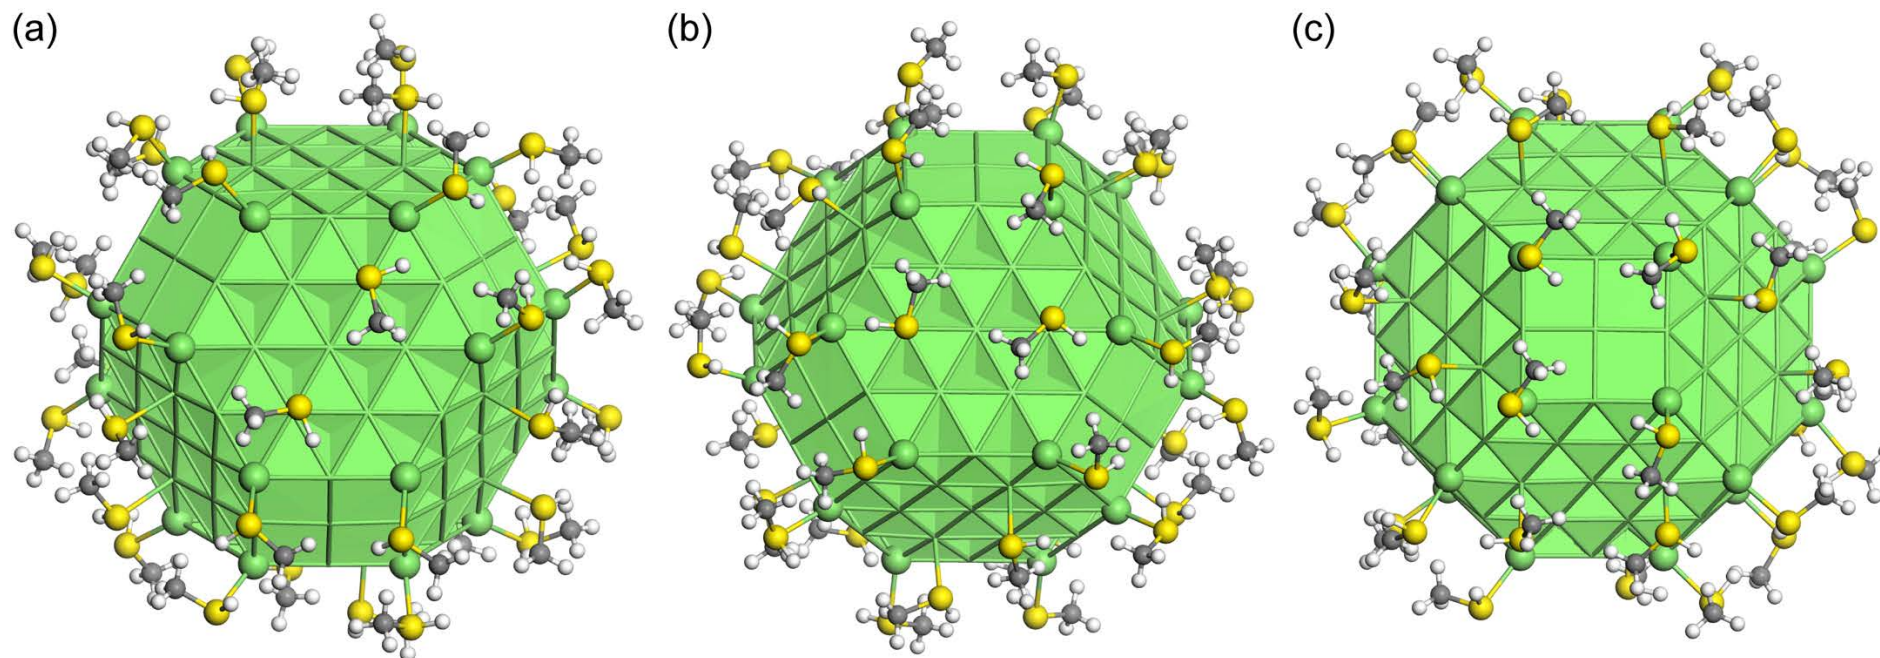

Figure S16. [**Ag<sub>201</sub>rto**] A shell of 40 methanethiol molecules (coadsorption 1) on the Ag<sub>201</sub>rto nanocluster in vacuum: (a-c) several views of the optimized structure (see Table 2 of article for more details about molecule surface density, coverage and energetics). The color labels are green for Ag, yellow for S, gray for C and white for H atoms.

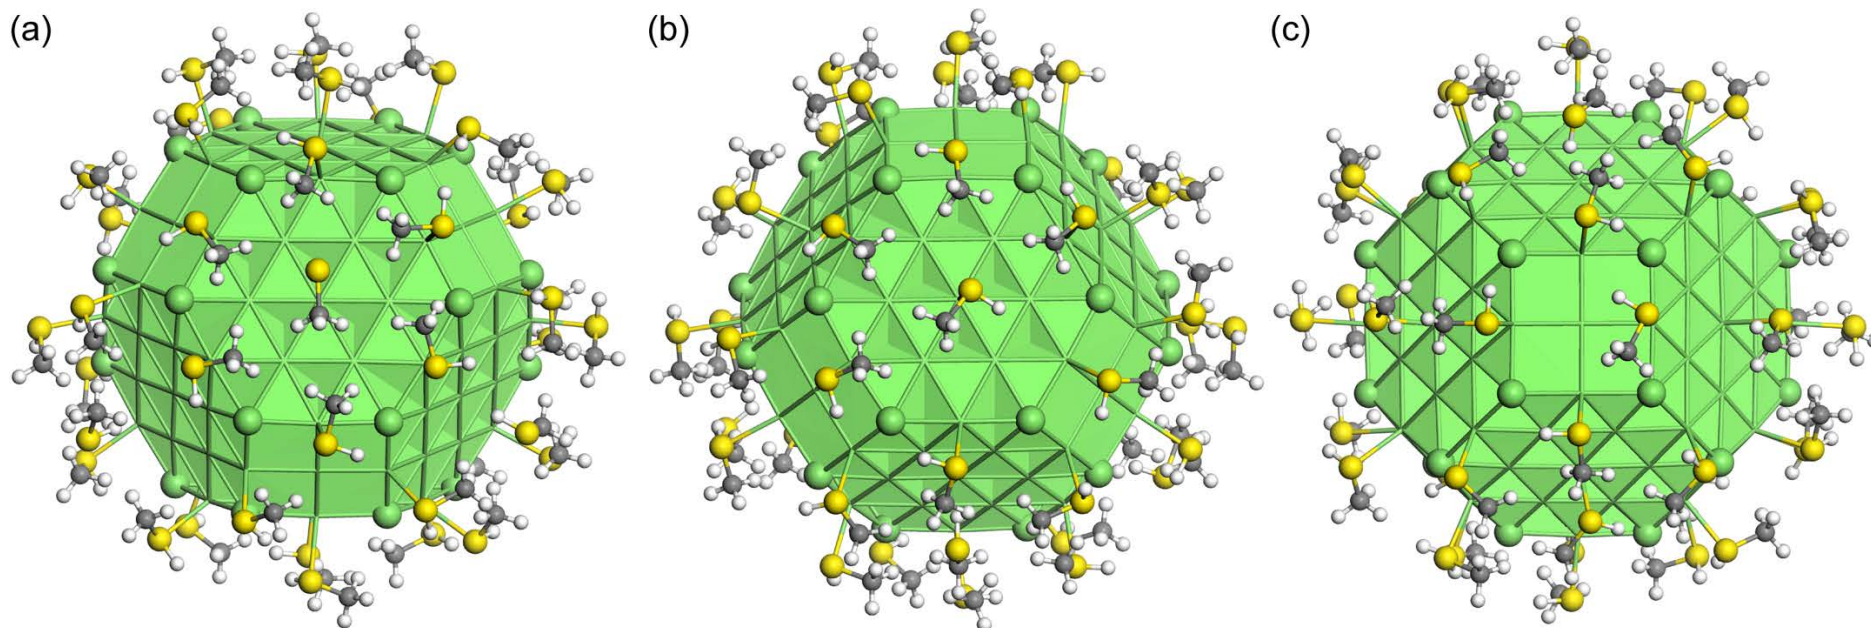

Figure S17. [**Ag<sub>201rto</sub>**] A shell of 44 methanethiol molecules (coadsorption 2) on the Ag<sub>201rto</sub> nanocluster in vacuum: (a-c) several top views of the optimized structure (see Table 2 of article for more details about molecule surface density, coverage and energetics). The color labels are green for Ag, yellow for S, gray for C and white for H atoms.



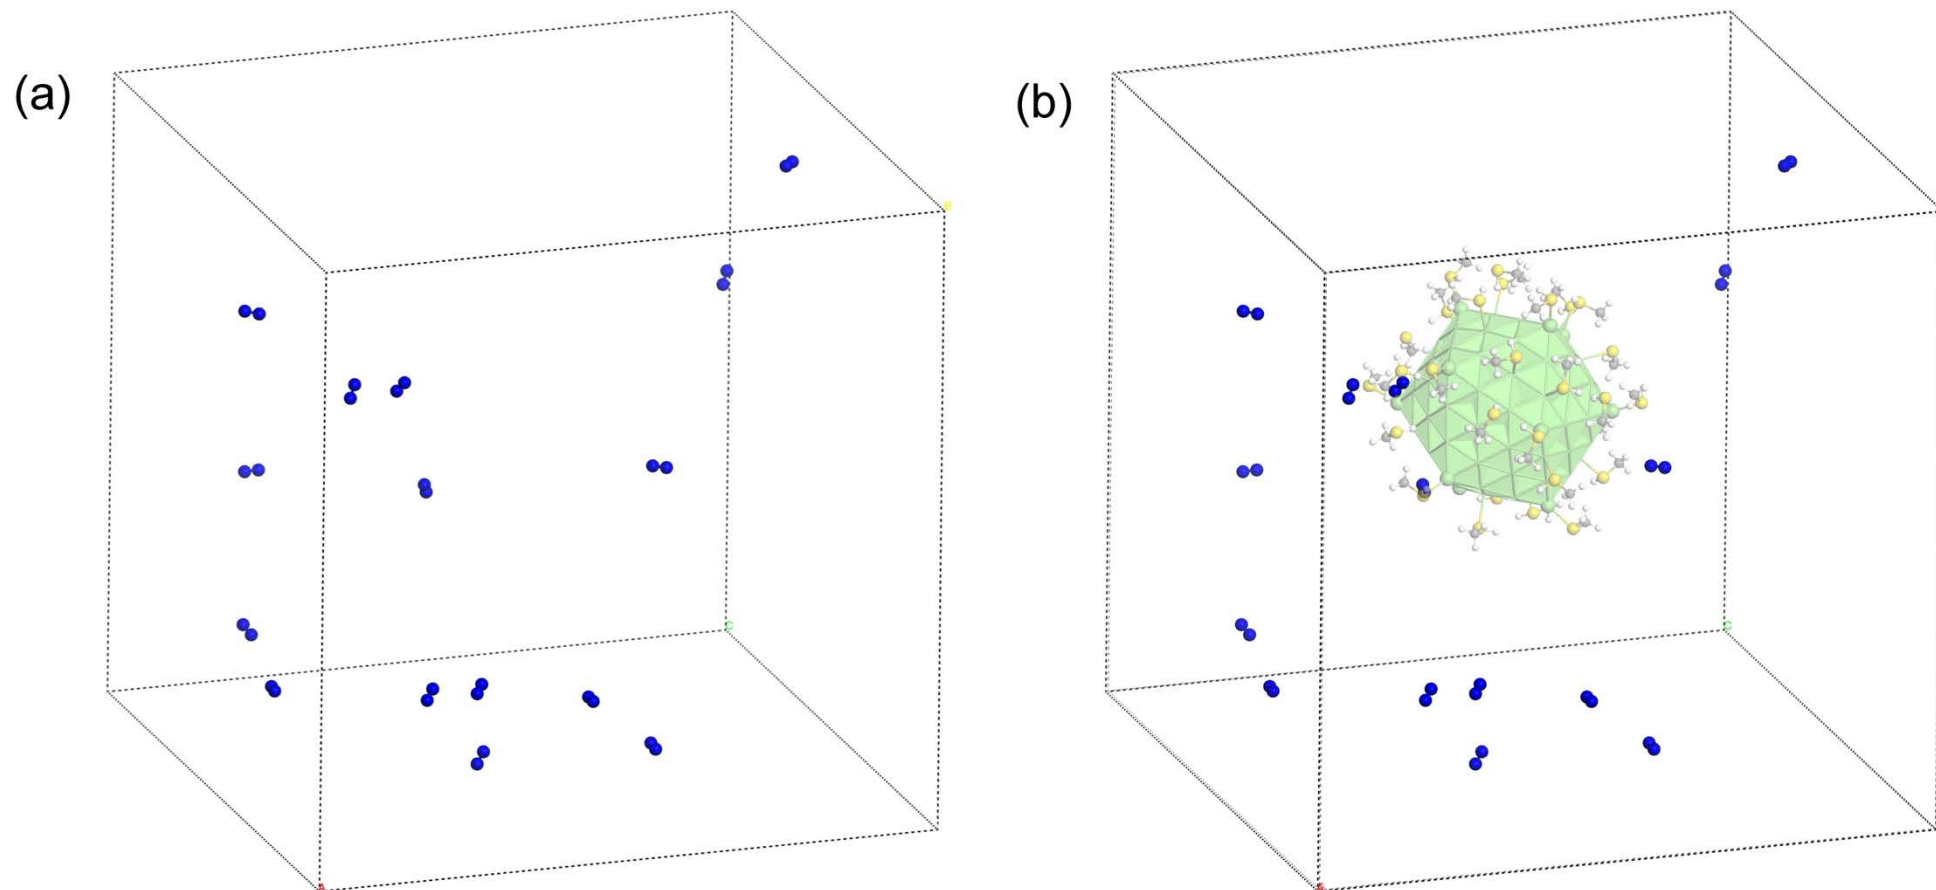

Figure S18. **[N<sub>2</sub> gas]** Atmospheric pressure modeled by equilibrating a pure N<sub>2</sub> gas at 300 K in a 3D box of 125 nm<sup>3</sup>, corresponding to a pressure of 5 atm (i.e. 15 N<sub>2</sub> molecules): (a) optimized structure obtained after extraction from the AIMD simulation (see Figure S19) and quenching at zero temperature and, (b) same structure with a Ag<sub>147</sub>ico nanocluster positioned at the center of the 3D box to show an initial configuration for immersing the cluster. The color labels are blue for N, green for Ag, yellow for S, gray for C and white for H atoms.

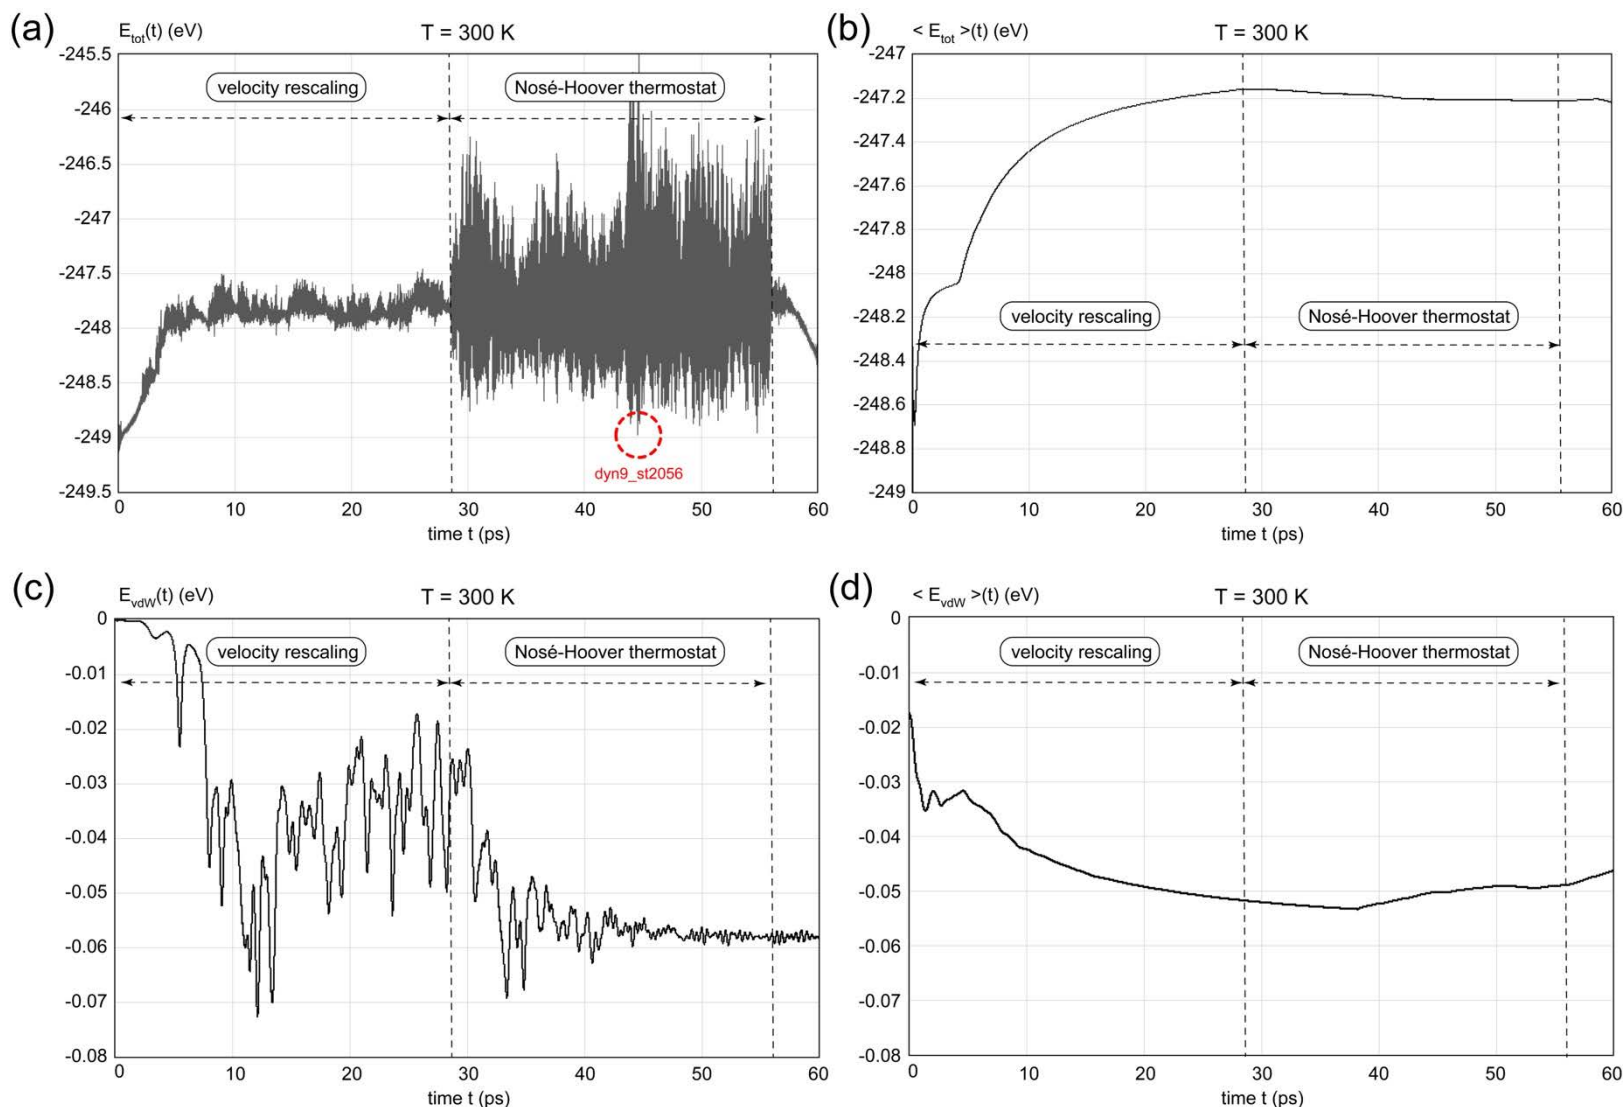

Figure S19. [N<sub>2</sub> gas] AIMD simulation (velocity rescaling and Nosé-Hoover thermostats) of a pure N<sub>2</sub> gas at 300 K in a 3D box of 125 nm<sup>3</sup> (P = 5 atm) (see Figure S18): (a) total electronic energy  $E_{\text{tot}}$  (eV) plotted against time ( $t$ ) in ps (the red dotted circle marking the “dyn9\_step2056” structure extracted from the trajectory to immerse Ag nanoparticles in gaseous pressure); (b) current average total electronic energy  $\langle E_{\text{tot}} \rangle$  (eV) against time; (c) total van der Waals dispersion energy  $E_{\text{vdW}}$  (eV) against time; (d) current average total van der Waals dispersion energy  $\langle E_{\text{vdW}} \rangle$  (eV) against time.

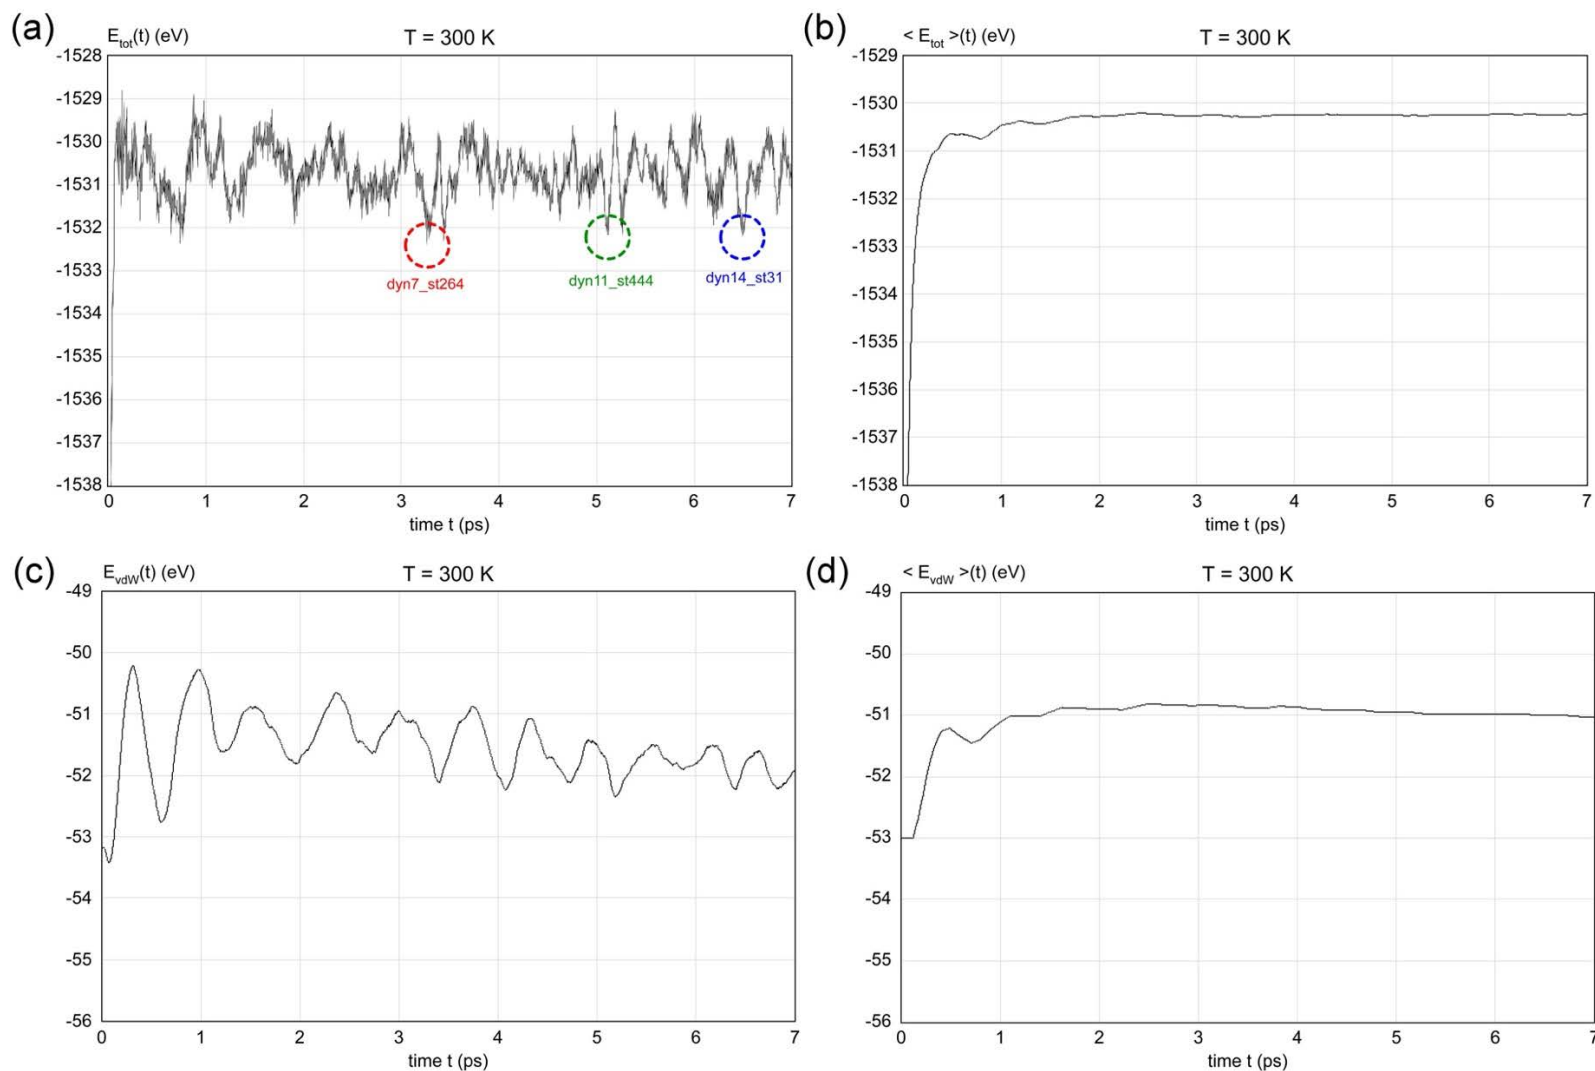

Figure S20. [Ag<sub>147</sub>ico] AIMD simulation at 300 K of Ag<sub>147</sub>ico nanocluster covered by a shell of 32 methanethiol contaminants (coadsorption 1) and immersed in 5 atm of N<sub>2</sub>: (a) total electronic energy  $E_{\text{tot}}$  (eV) plotted against time ( $t$ ) in ps (the red, green and blue dotted circles marking respectively the “dyn7\_step264”, “dyn11\_step444” and “dyn14\_step31” structures extracted from the trajectory after thermalization step); (b) current average total electronic energy  $\langle E_{\text{tot}} \rangle$  (eV) against time; (c) total van der Waals dispersion energy  $E_{\text{vdW}}$  (eV) against time; (d) current average total van der Waals dispersion energy  $\langle E_{\text{vdW}} \rangle$  (eV) against time.

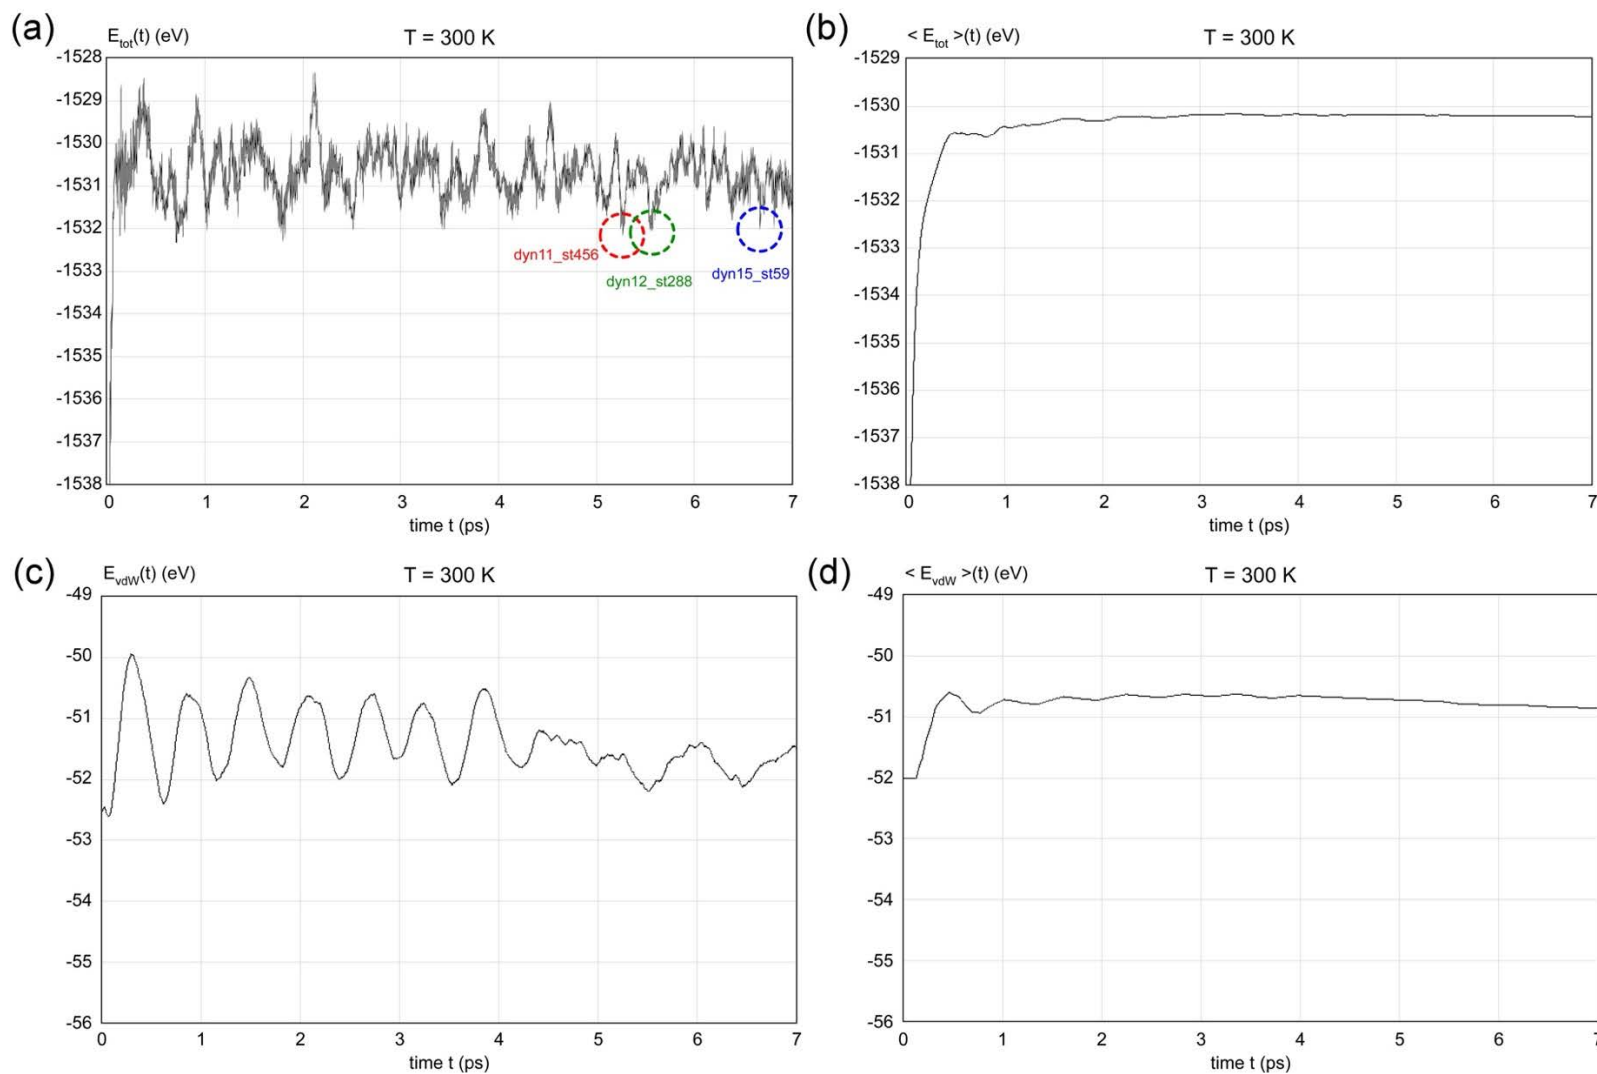

Figure S21. **[Ag147ico]** AIMD simulation at 300 K of Ag147ico nanocluster covered by a shell of 32 methanethiol contaminants (coadsorption 2) and immersed in 5 atm of N<sub>2</sub>: (a) total electronic energy  $E_{\text{tot}}$  (eV) plotted against time (t) in ps (the red, green and blue dotted circles marking respectively the “dyn11\_step456”, “dyn12\_step288” and “dyn15\_step59” structures extracted from the trajectory after thermalization step); (b) current average total electronic energy  $\langle E_{\text{tot}} \rangle$  (eV) against time; (c) total van der Waals dispersion energy  $E_{\text{vdW}}$  (eV) against time; (d) current average total van der Waals dispersion energy  $\langle E_{\text{vdW}} \rangle$  (eV) against time.

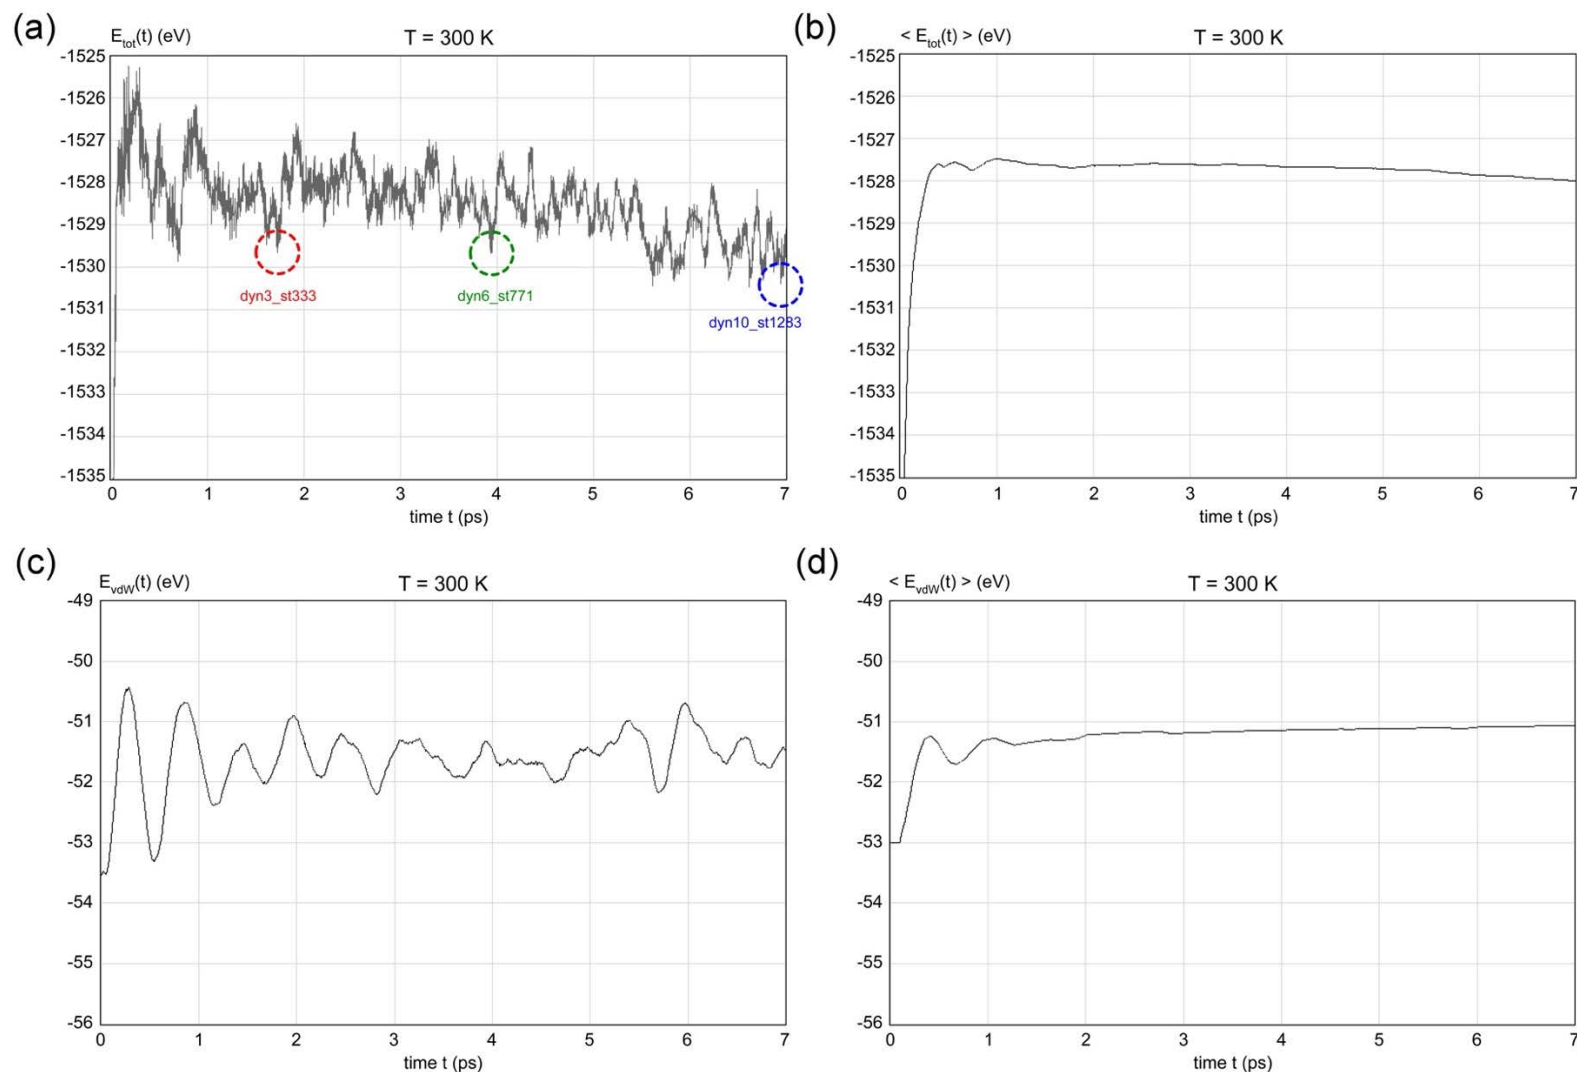

Figure S22. **[Ag147sito]** AIMD simulation at 300 K of Ag147sito nanocluster covered by a shell of 32 methanethiol contaminants and immersed in 5 atm of N<sub>2</sub>: (a) total electronic energy  $E_{\text{tot}}$  (eV) plotted against time ( $t$ ) in ps (the red, green and blue dotted circles marking respectively the “dyn3\_step333”, “dyn6\_step771” and “dyn10\_step1283” structures extracted from the trajectory after thermalization step); (b) current average total electronic energy  $\langle E_{\text{tot}} \rangle$  (eV) against time; (c) total van der Waals dispersion energy  $E_{\text{vdW}}$  (eV) against time; (d) current average total van der Waals dispersion energy  $\langle E_{\text{vdW}} \rangle$  (eV) against time.



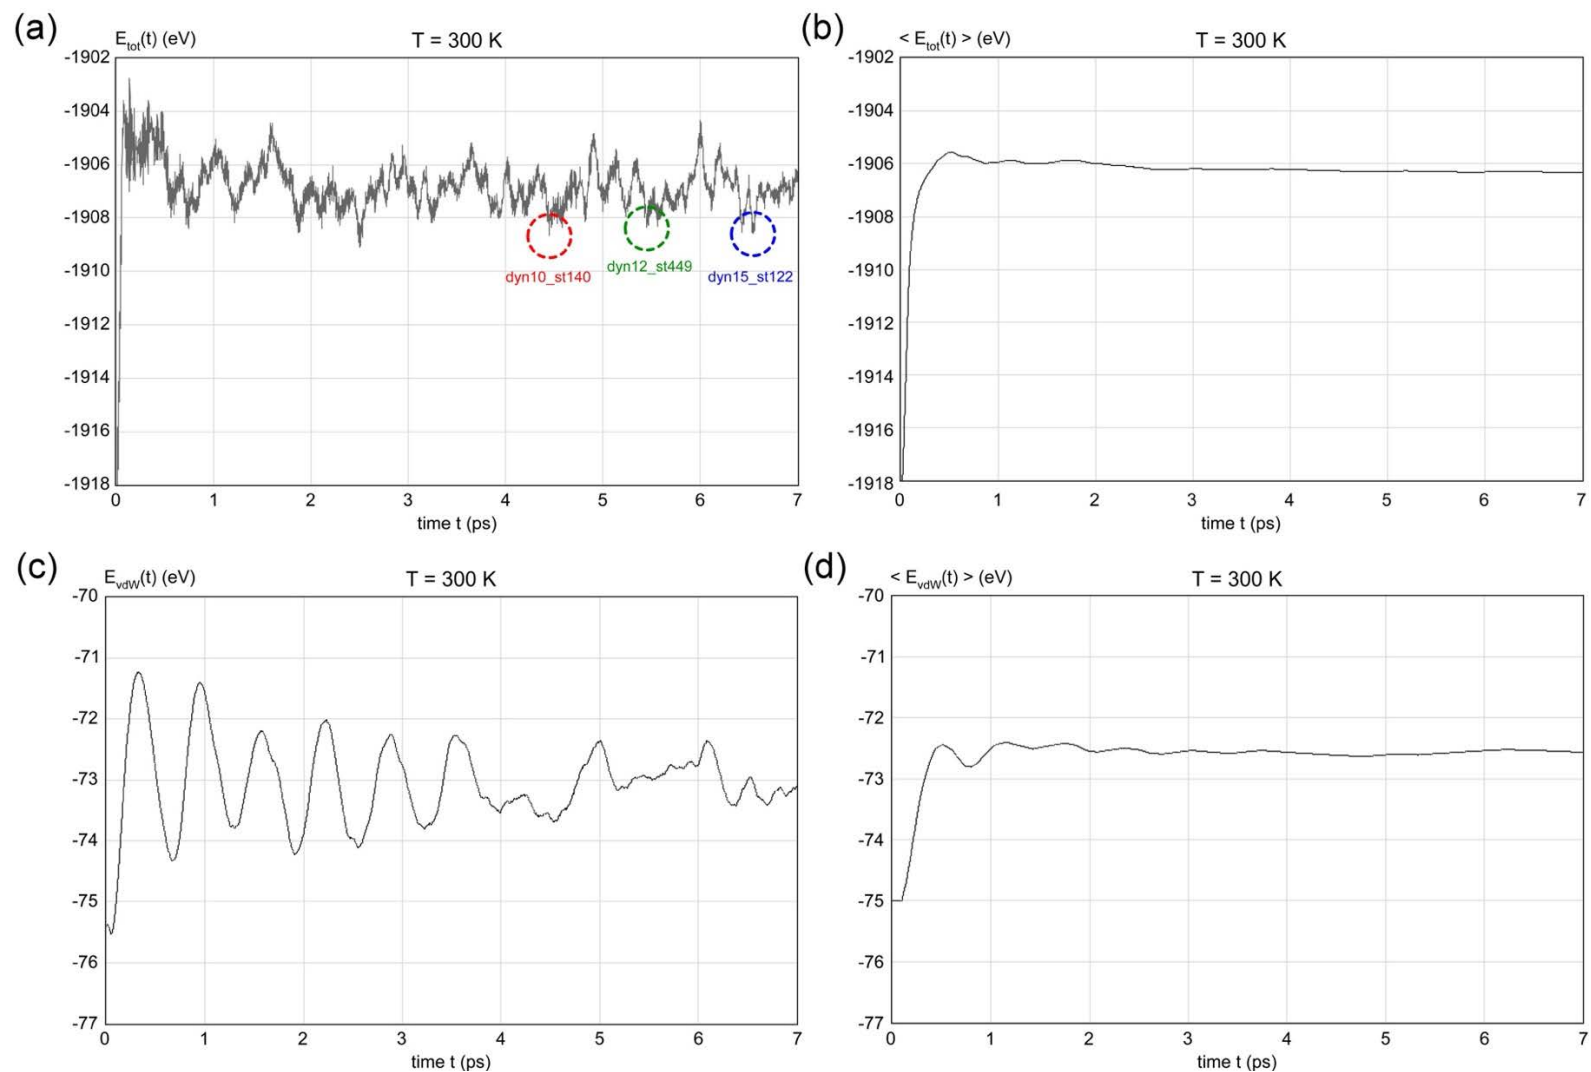

Figure S23. [Ag201rto] AIMD simulation at 300 K of Ag201rto nanocluster covered by a shell of 40 methanethiol contaminants (coadsorption 1) and immersed in 5 atm of N<sub>2</sub>: (a) total electronic energy  $E_{\text{tot}}$  (eV) plotted against time ( $t$ ) in ps (the red, green and blue dotted circles marking respectively the “dyn10\_step140”, “dyn12\_step449” and “dyn15\_step122” structures extracted from the trajectory after thermalization step); (b) current average total electronic energy  $\langle E_{\text{tot}} \rangle$  (eV) against time; (c) total van der Waals dispersion energy  $E_{\text{vdw}}$  (eV) against time; (d) current average total van der Waals dispersion energy  $\langle E_{\text{vdw}} \rangle$  (eV) against time.

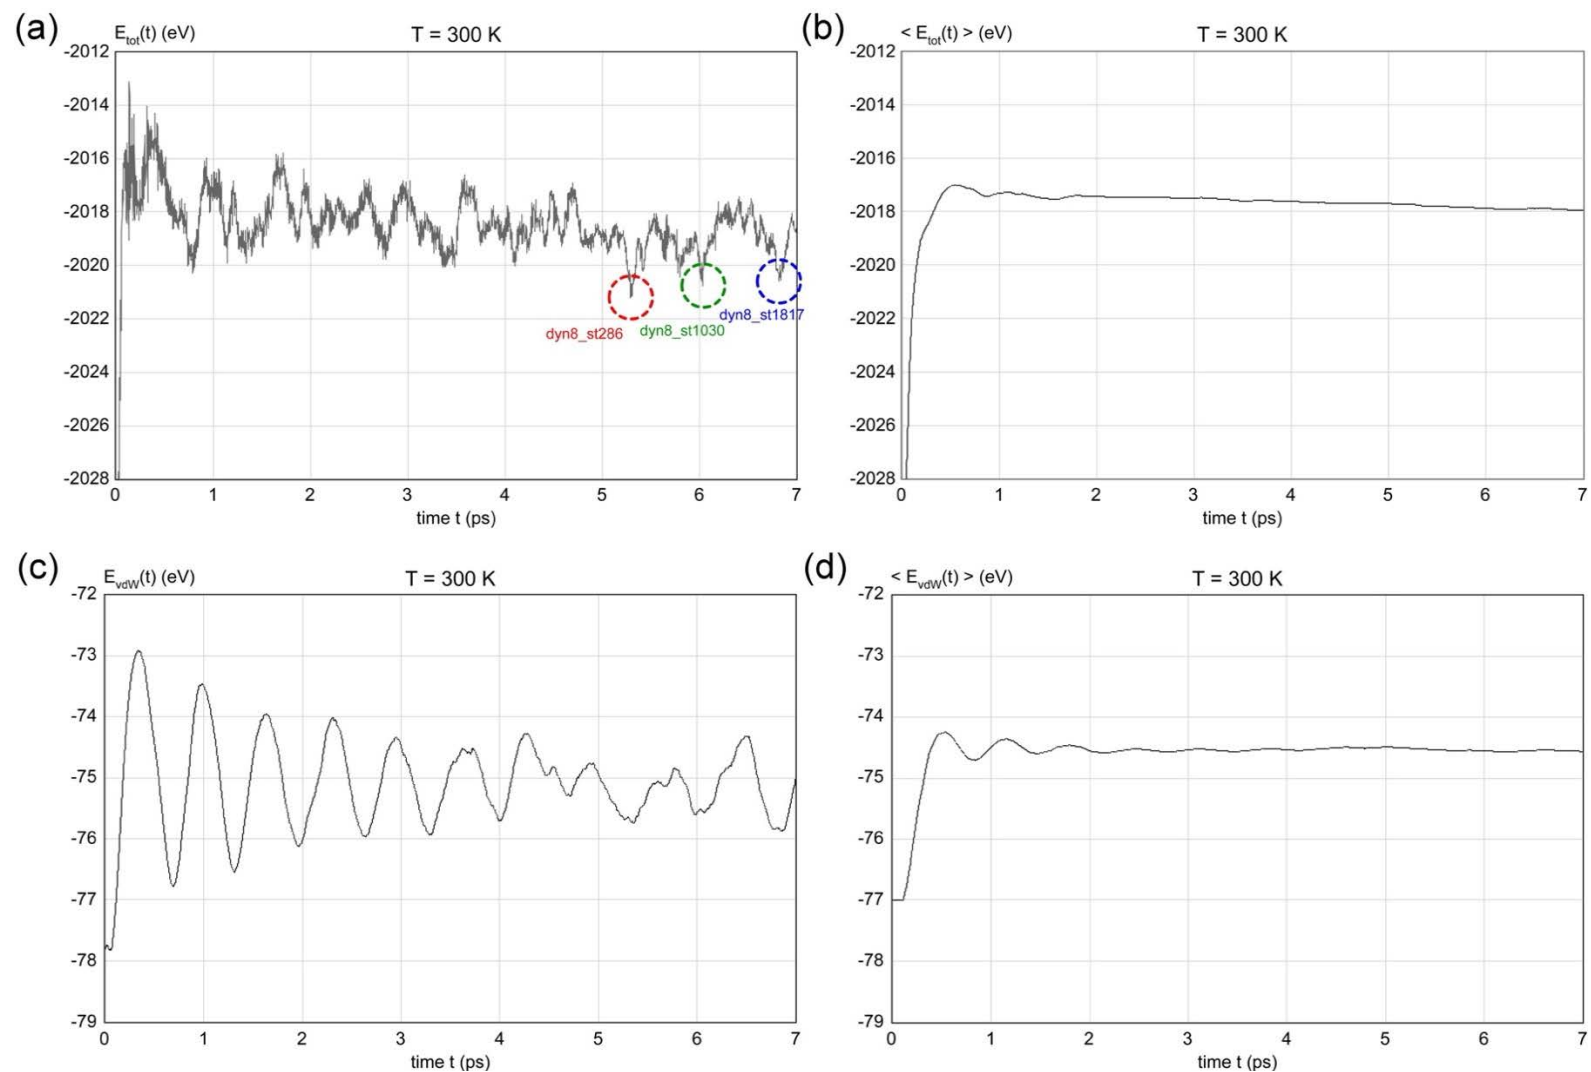

Figure S24. [Ag201rto] AIMD simulation at 300 K of Ag201rto nanocluster covered by a shell of 44 methanethiol contaminants (coadsorption 2) and immersed in 5 atm of N<sub>2</sub>: (a) total electronic energy  $E_{\text{tot}}$  (eV) plotted against time ( $t$ ) in ps (the red, green and blue dotted circles marking respectively the “dyn8\_step286”, “dyn8\_step1030” and “dyn8\_step1817” structures extracted from the trajectory after thermalization step); (b) current average total electronic energy  $\langle E_{\text{tot}} \rangle$  (eV) against time; (c) total van der Waals dispersion energy  $E_{\text{vdw}}$  (eV) against time; (d) current average total van der Waals dispersion energy  $\langle E_{\text{vdw}} \rangle$  (eV) against time.

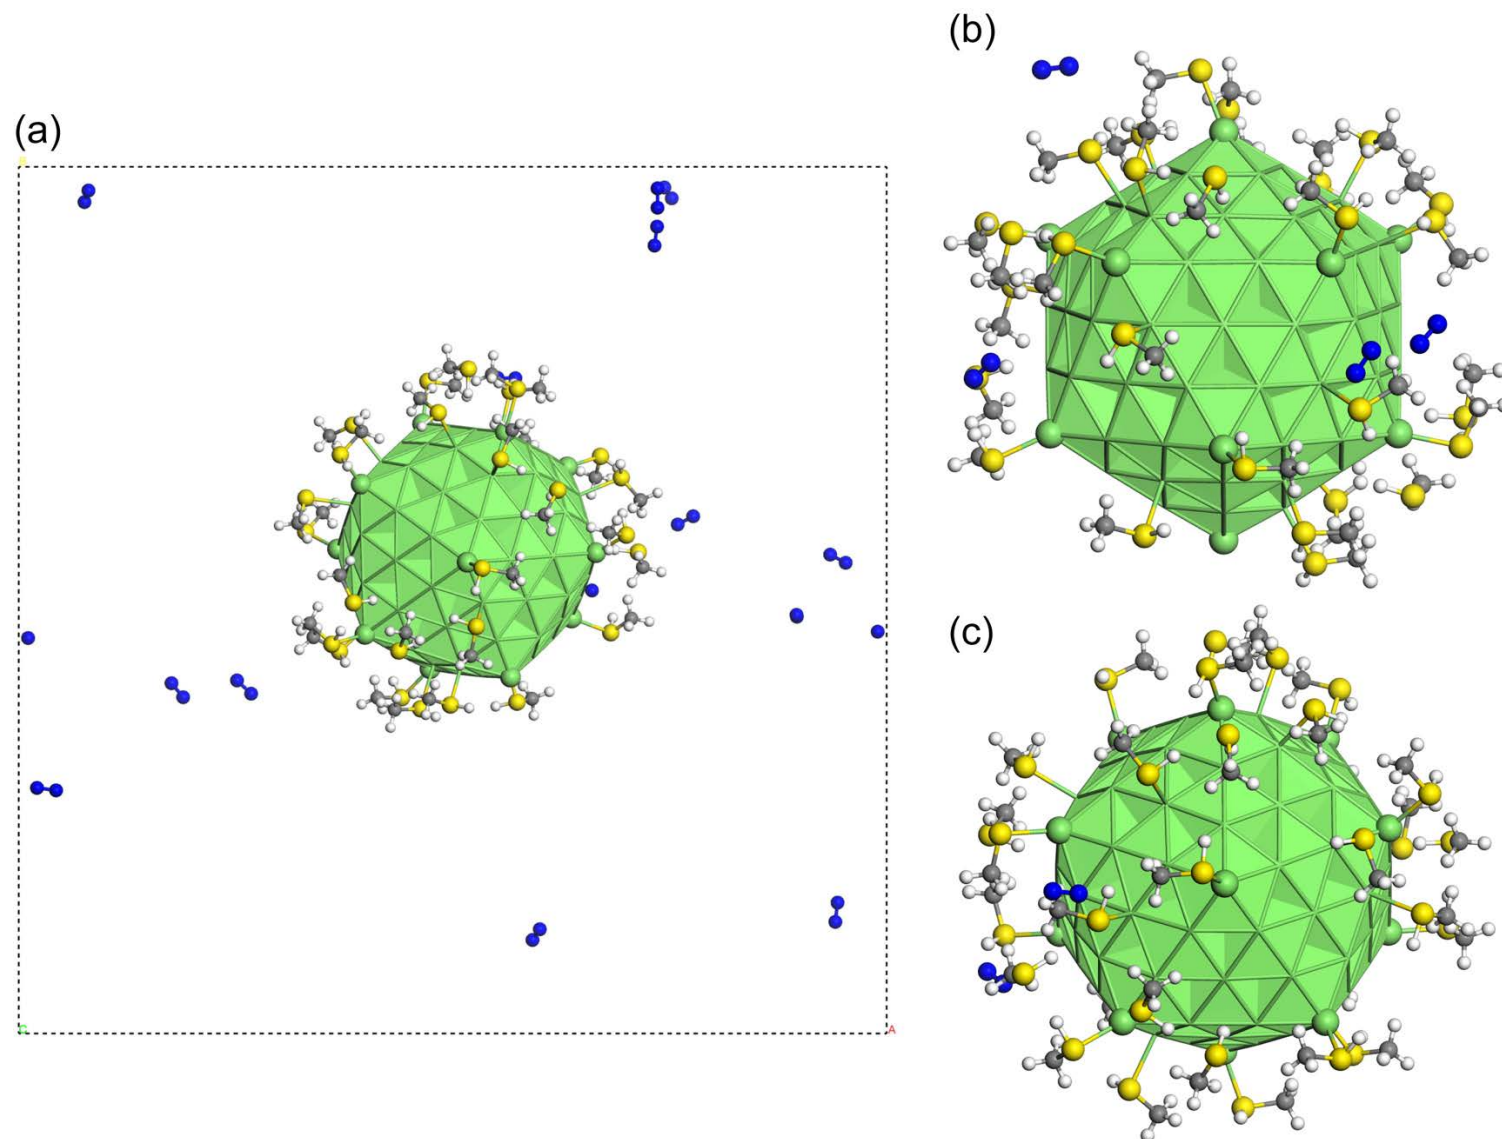

Figure S25. [Ag<sub>147</sub>ico] Optimized coadsorption structure “1\_dyn7\_step264” corresponding to a shell of 32 methanethiol molecules on the Ag<sub>147</sub>ico nanocluster in presence of N<sub>2</sub> gas: (a) illustration of the complete system, (b) lateral and (c) top views focused on the nanoparticle (see Table 3 of article for more details about energetics). The color labels are blue for N, green for Ag, yellow for S, gray for C and white for H atoms.

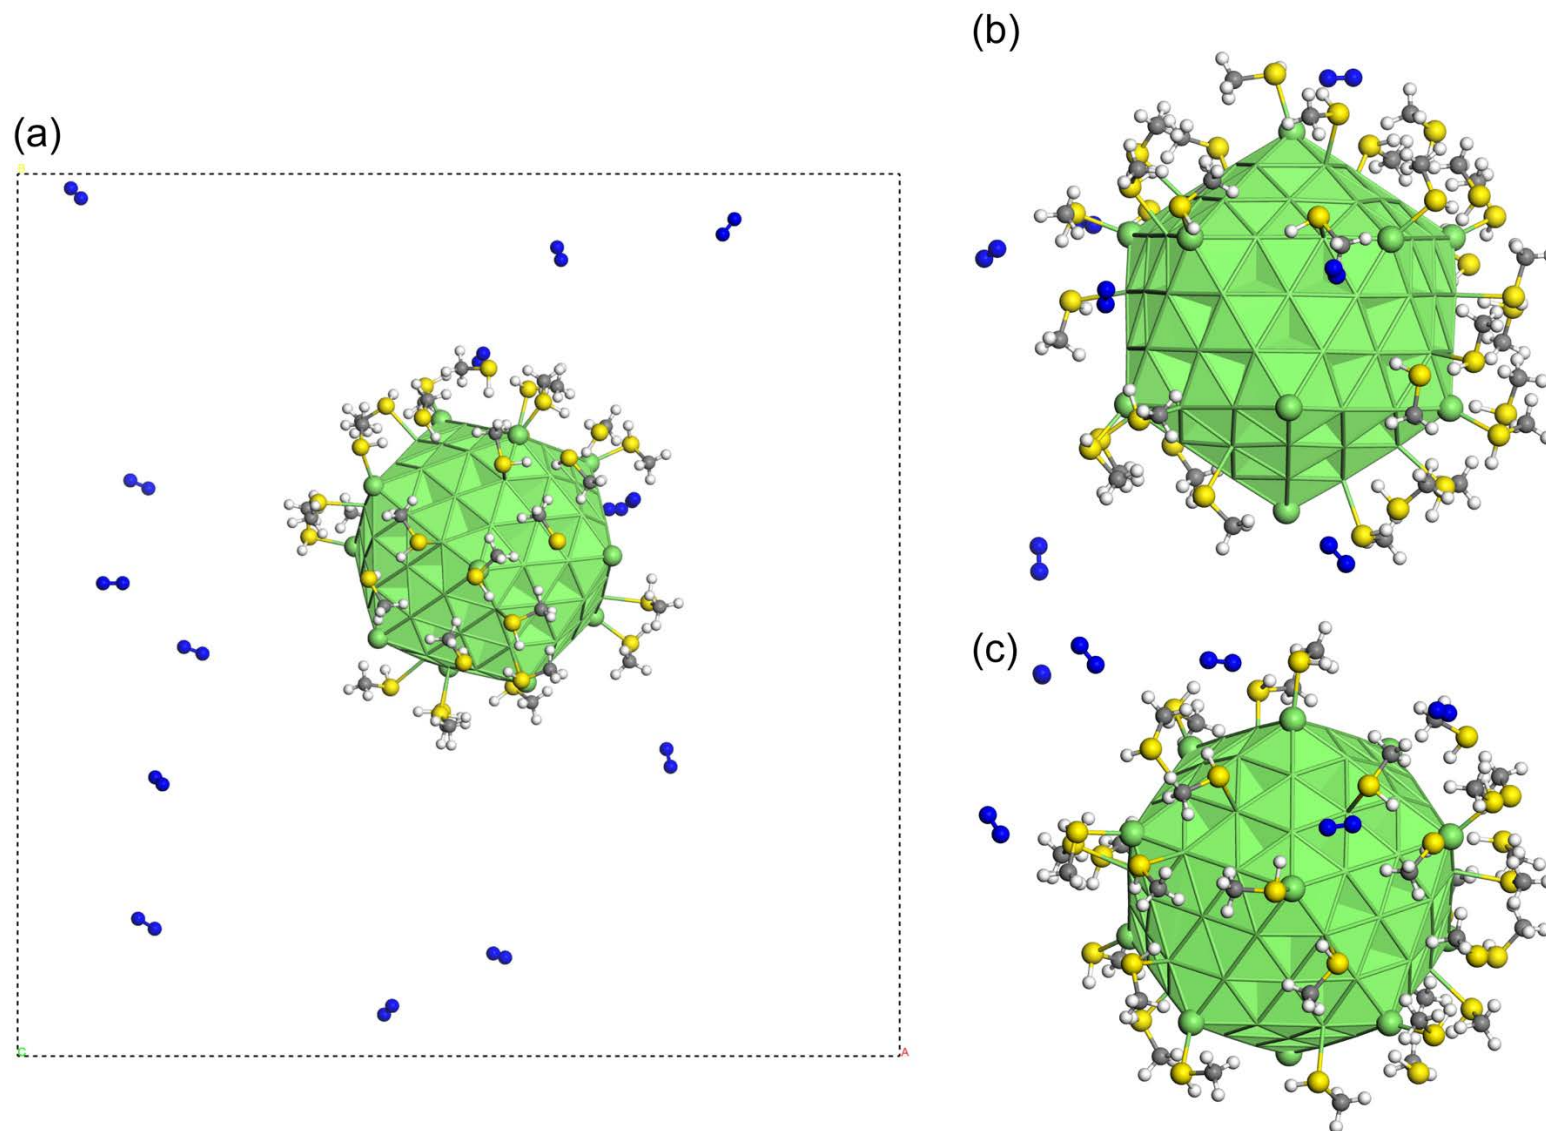

Figure S26. [**Ag147ico**] Optimized coadsorption structure “1\_dyn11\_step444” corresponding to a shell of 32 methanethiol molecules on the Ag<sub>147</sub>ico nanocluster in presence of N<sub>2</sub> gas: (a) illustration of the complete system, (b) lateral and (c) top views focused on the nanoparticle (see Table 3 of article for more details about energetics). The color labels are blue for N, green for Ag, yellow for S, gray for C and white for H atoms.

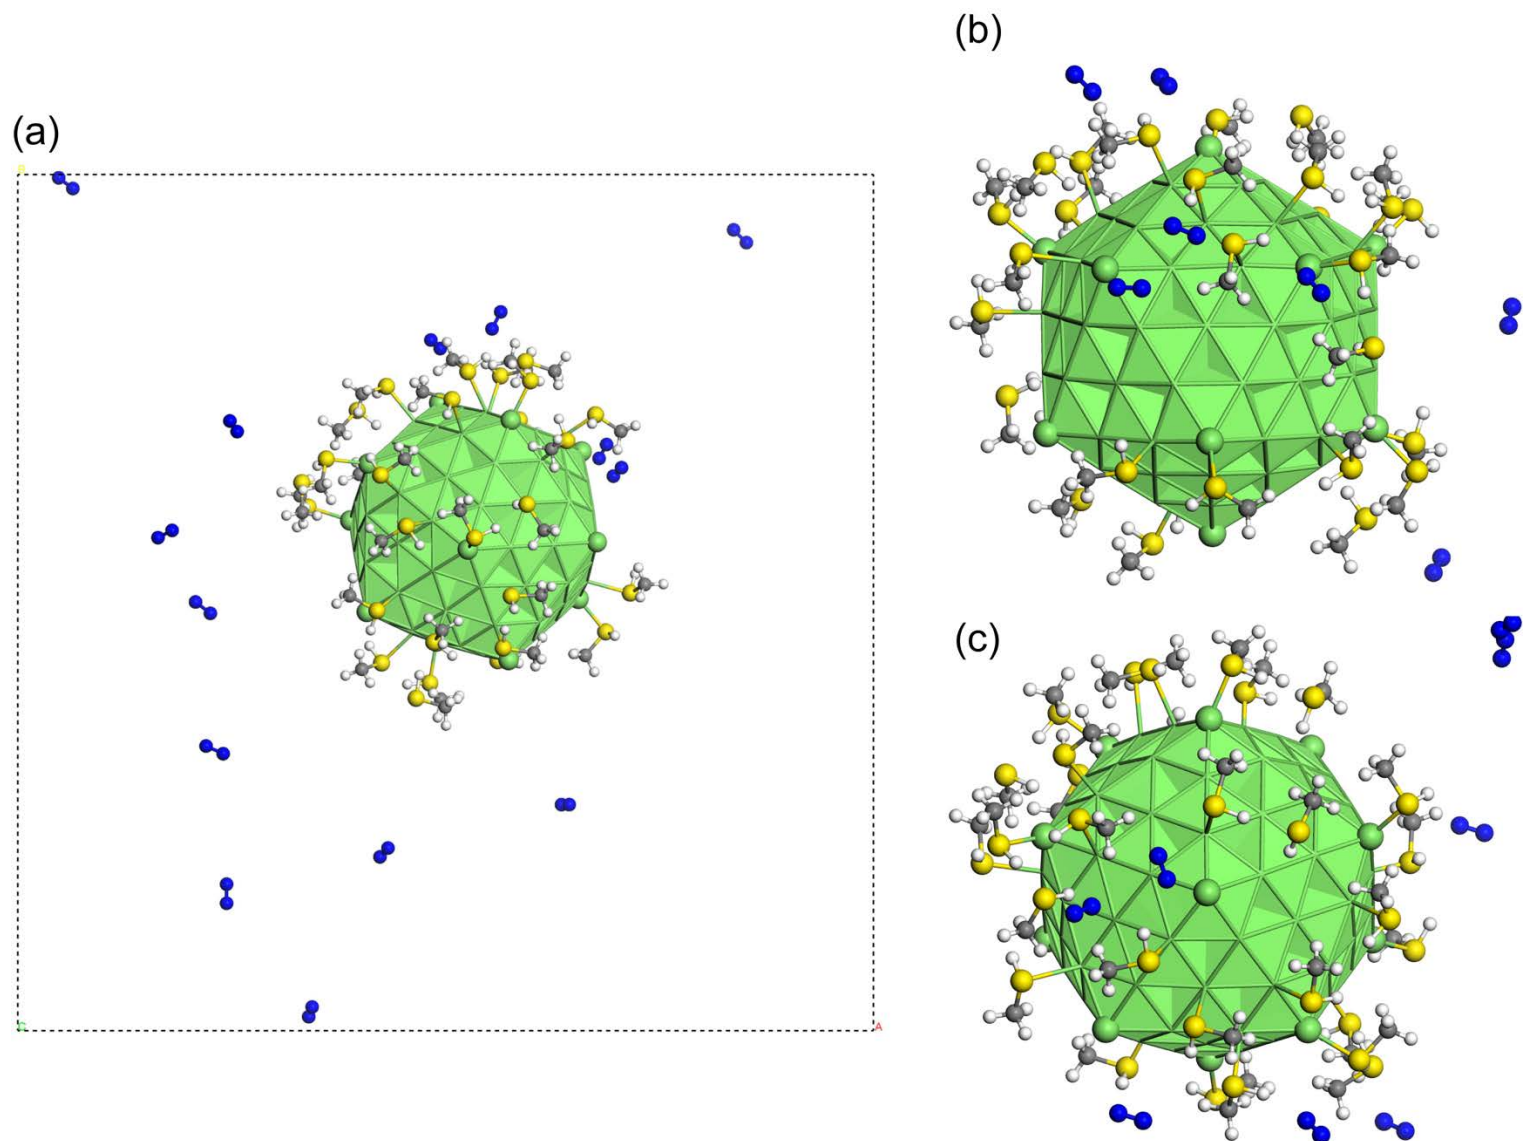

Figure S27. [**Ag147ico**] Optimized coadsorption structure “1\_dyn14\_step31” corresponding to a shell of 32 methanethiol molecules on the Ag147ico nanocluster in presence of N<sub>2</sub> gas: (a) illustration of the complete system, (b) lateral and (c) top views focused on the nanoparticle (see Table 3 of article for more details about energetics). The color labels are blue for N, green for Ag, yellow for S, gray for C and white for H atoms.



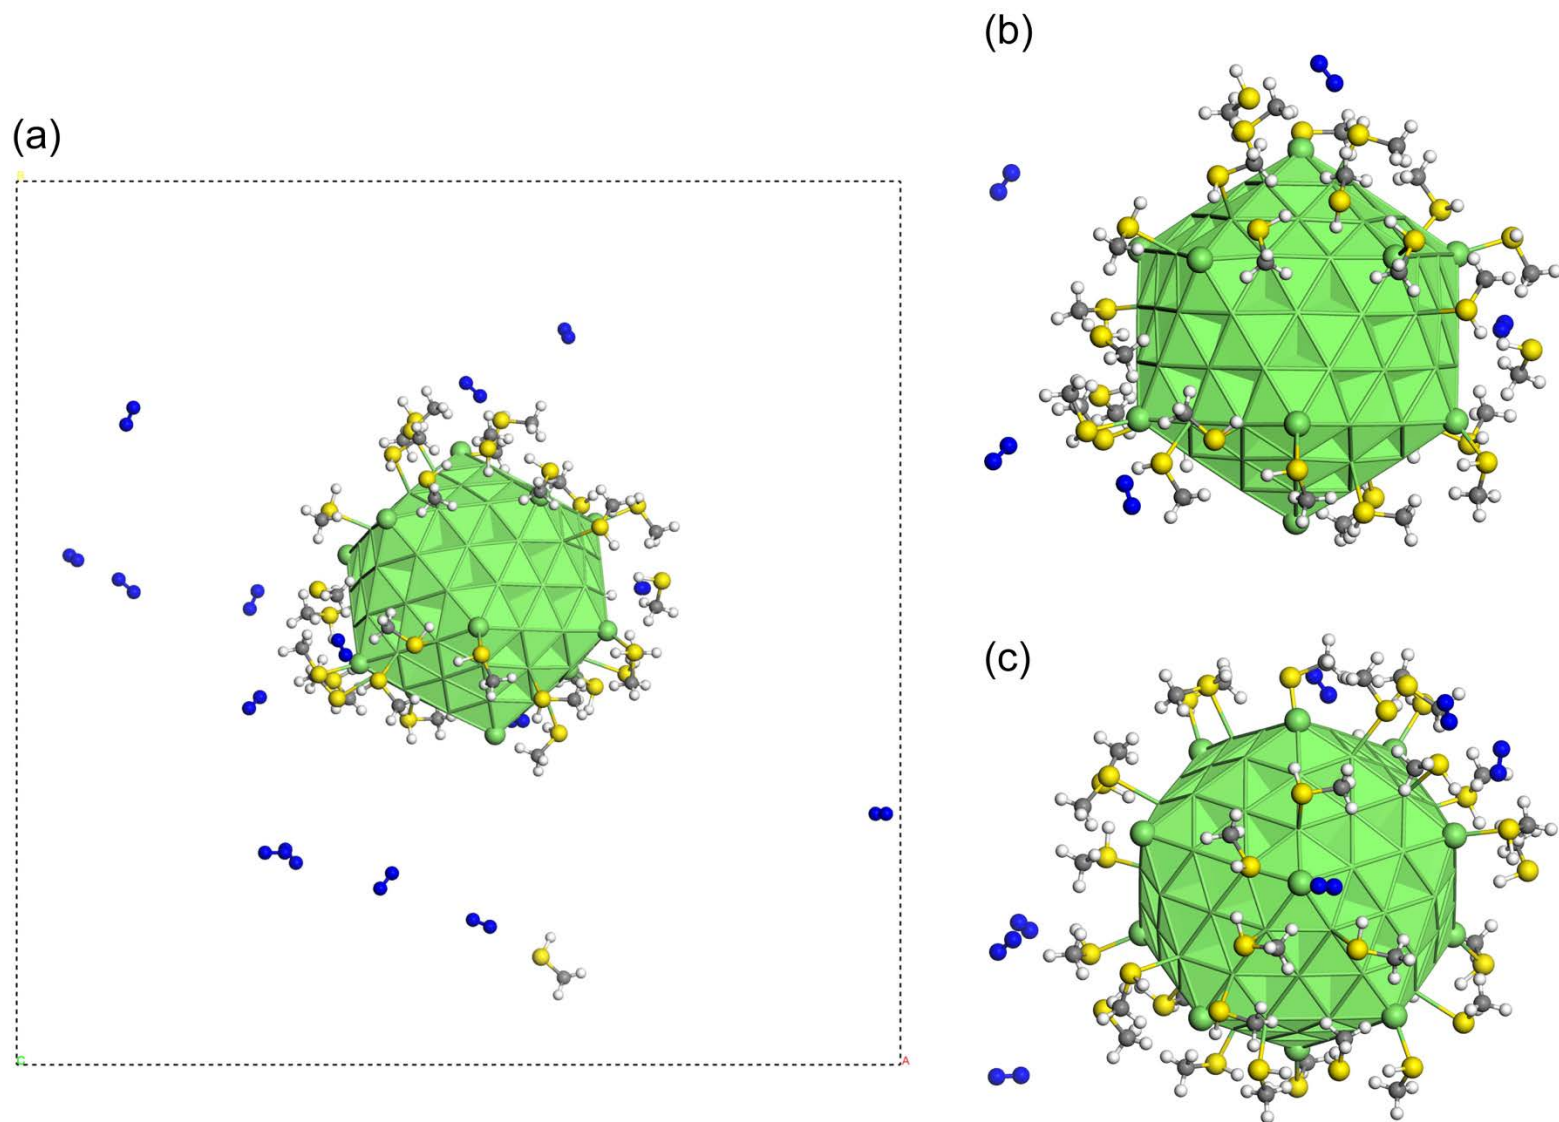

Figure S28. [**Ag147ico**] Optimized coadsorption structure “2\_dyn11\_step456” corresponding to a shell of 32 methanethiol molecules on the Ag147ico nanocluster in presence of N<sub>2</sub> gas: (a) illustration of the complete system, (b) lateral and (c) top views focused on the nanoparticle (see Table 3 of article for more details about energetics). The color labels are blue for N, green for Ag, yellow for S, gray for C and white for H atoms.

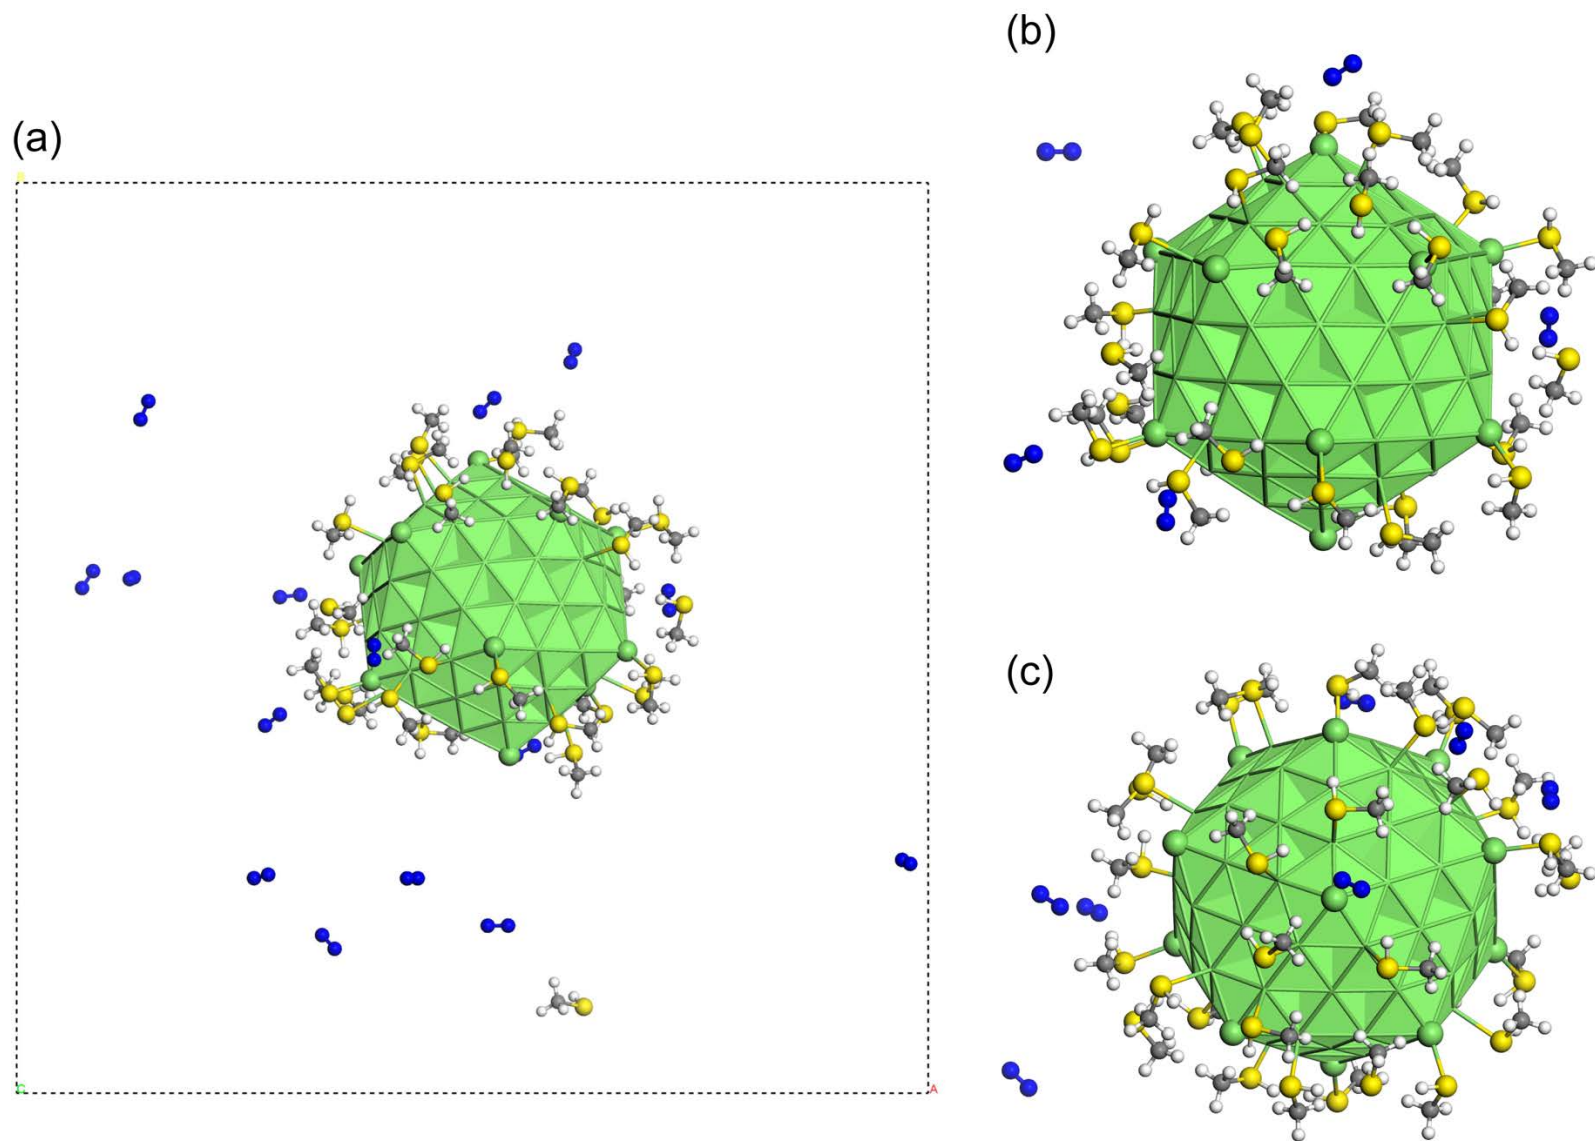

Figure S29. [Ag147ico] Optimized coadsorption structure “2\_dyn12\_step288” corresponding to a shell of 32 methanethiol molecules on the Ag147ico nanocluster in presence of N<sub>2</sub> gas: (a) illustration of the complete system, (b) lateral and (c) top views focused on the nanoparticle (see Table 3 of article for more details about energetics). The color labels are blue for N, green for Ag, yellow for S, gray for C and white for H atoms.

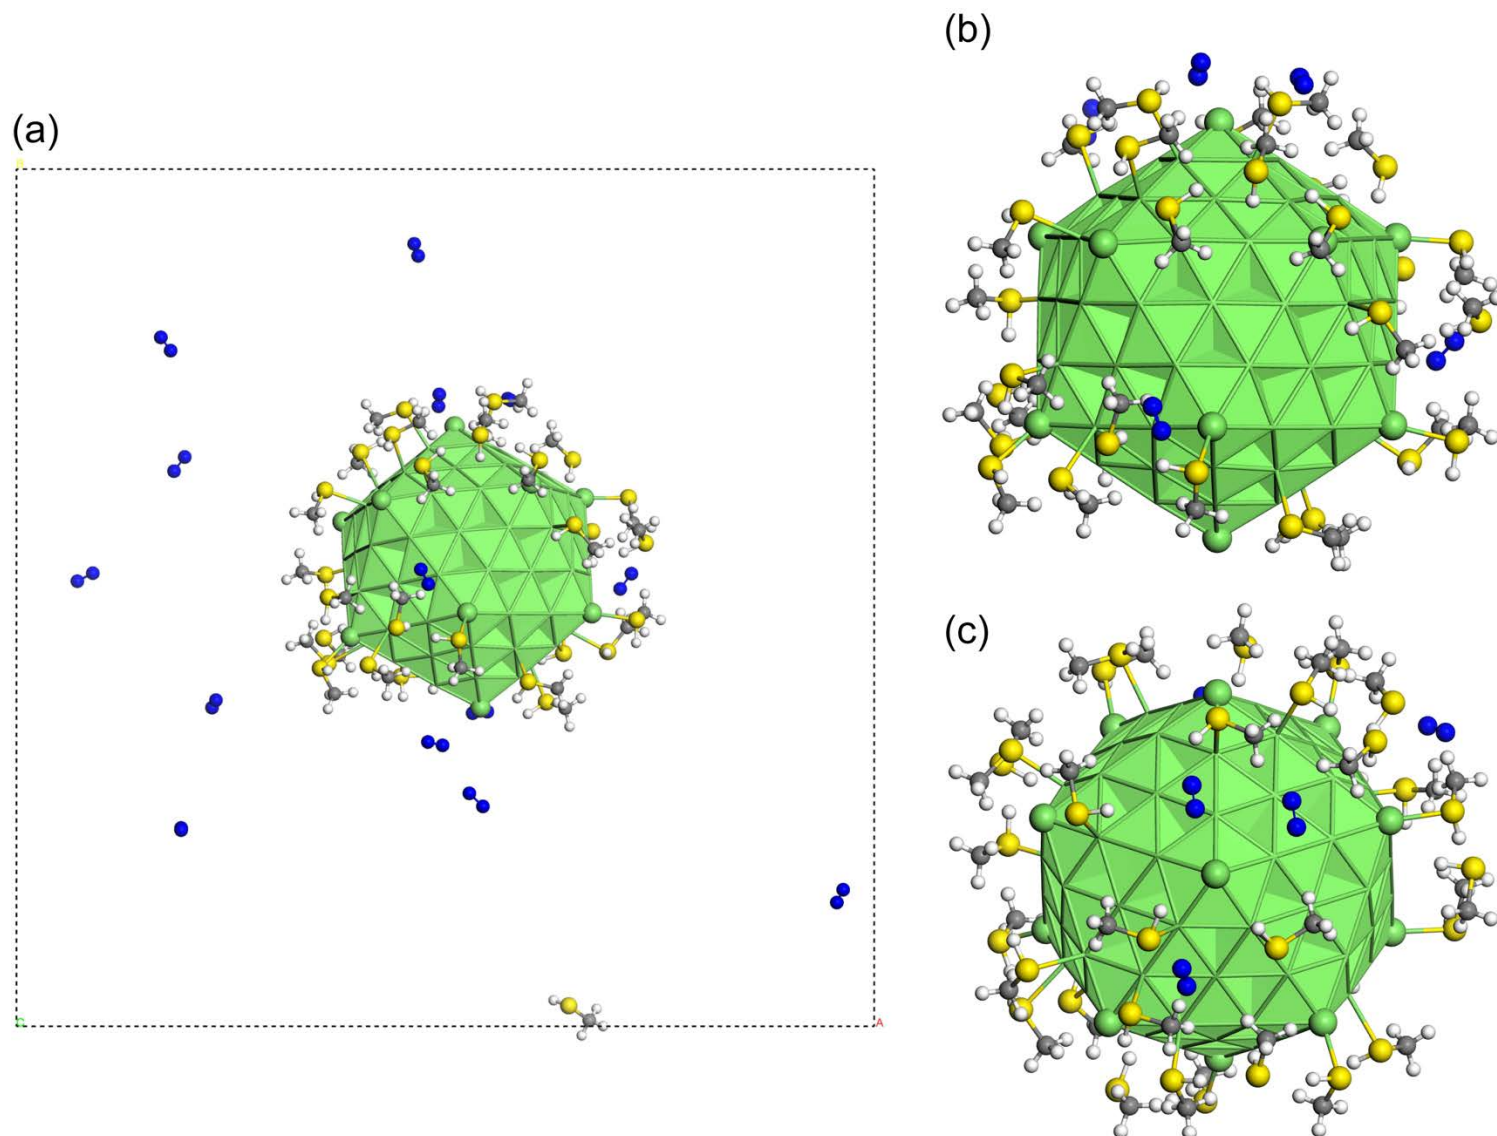

Figure S30. [Ag<sub>147</sub>ico] Optimized coadsorption structure “2\_dyn15\_step59” corresponding to a shell of 32 methanethiol molecules on the Ag<sub>147</sub>ico nanocluster in presence of N<sub>2</sub> gas: (a) illustration of the complete system, (b) lateral and (c) top views focused on the nanoparticle (see Table 3 of article for more details about energetics). The color labels are blue for N, green for Ag, yellow for S, gray for C and white for H atoms.



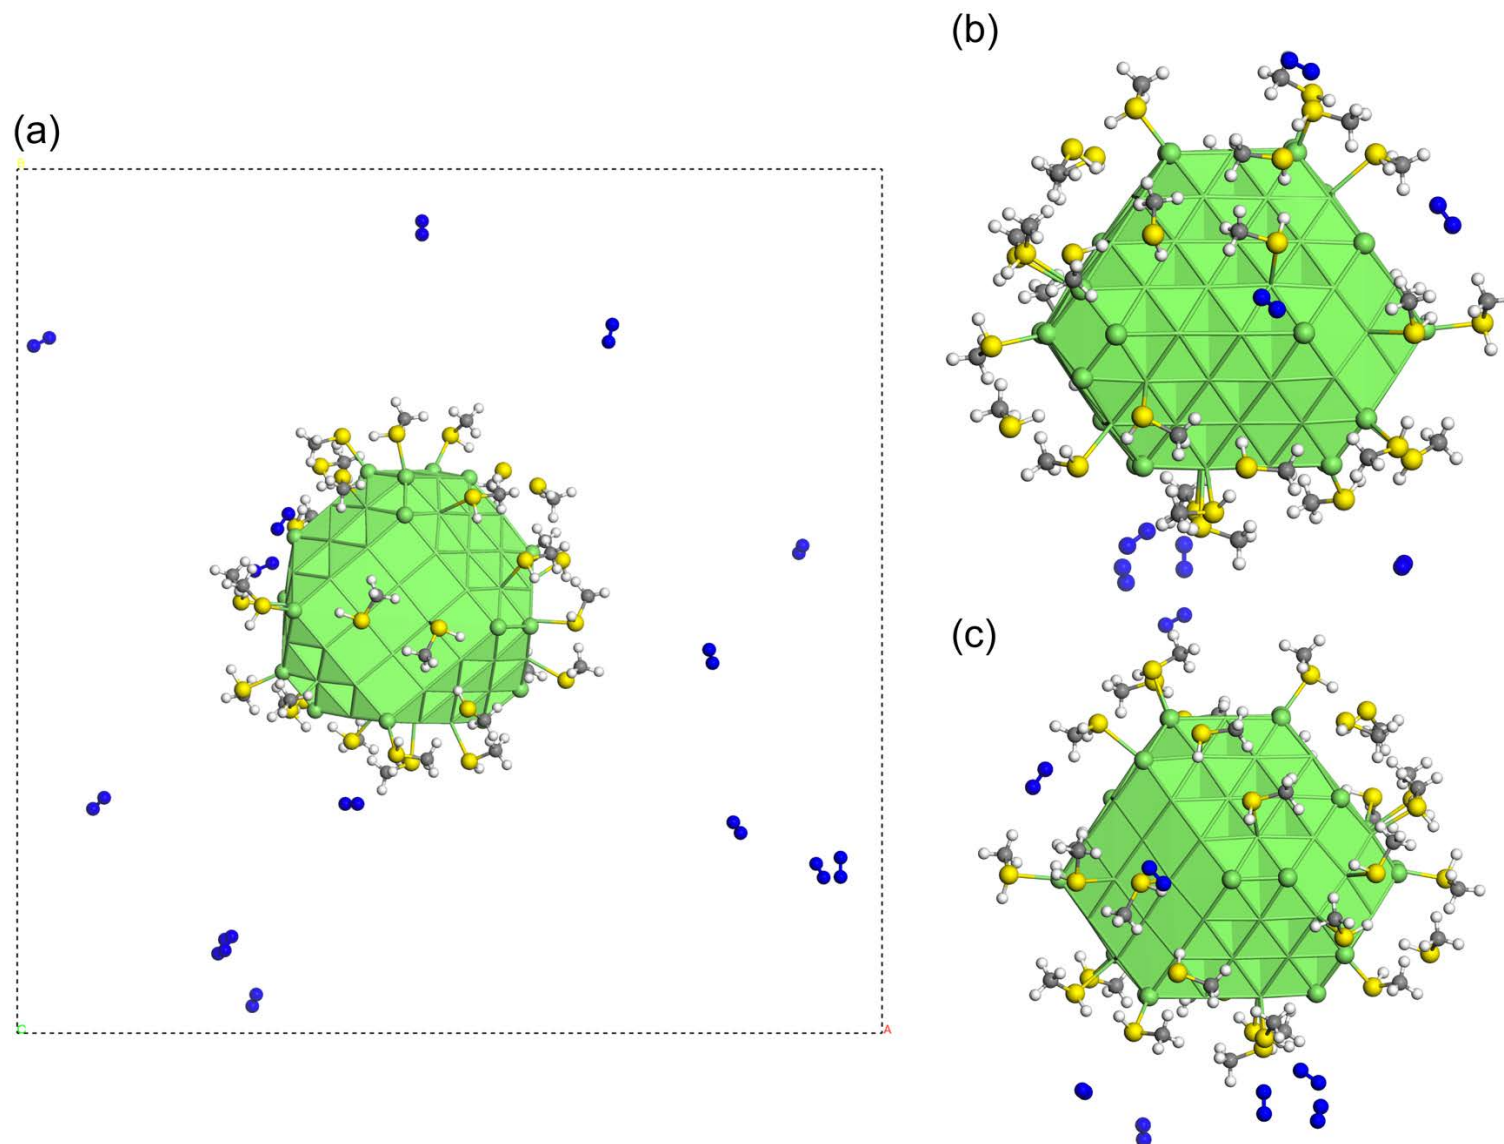

Figure S31. [Ag<sub>17</sub>site] Optimized coadsorption structure “dyn3\_step333” corresponding to a shell of 32 methanethiol molecules on the Ag<sub>17</sub>site nanocluster in presence of N<sub>2</sub> gas: (a) illustration of the complete system, (b-c) several views focused on the nanoparticle (see Table 3 of article for more details about energetics). The color labels are blue for N, green for Ag, yellow for S, gray for C and white for H atoms.

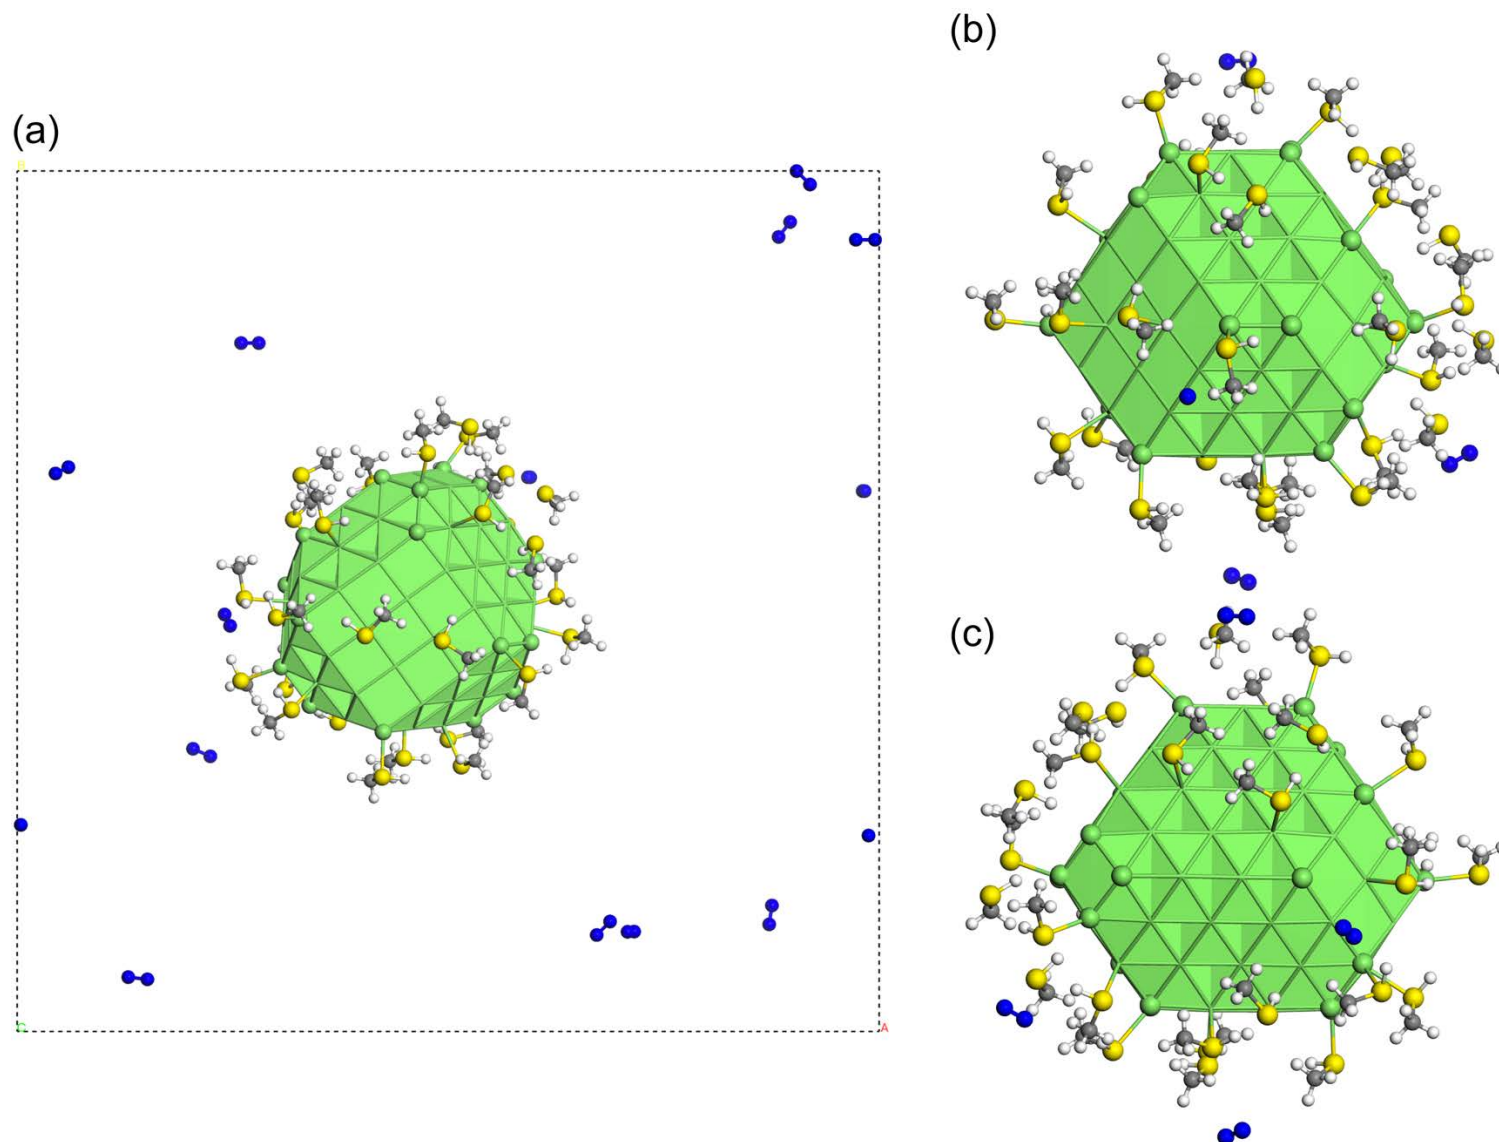

Figure S32. [Ag<sub>147</sub>site] Optimized coadsorption structure “dyn6\_step771” corresponding to a shell of 32 methanethiol molecules on the Ag<sub>147</sub>site nanoparticle in presence of N<sub>2</sub> gas: (a) illustration of the complete system, (b-c) several views focused on the nanoparticle (see Table 3 of article for more details about energetics). The color labels are blue for N, green for Ag, yellow for S, gray for C and white for H atoms.

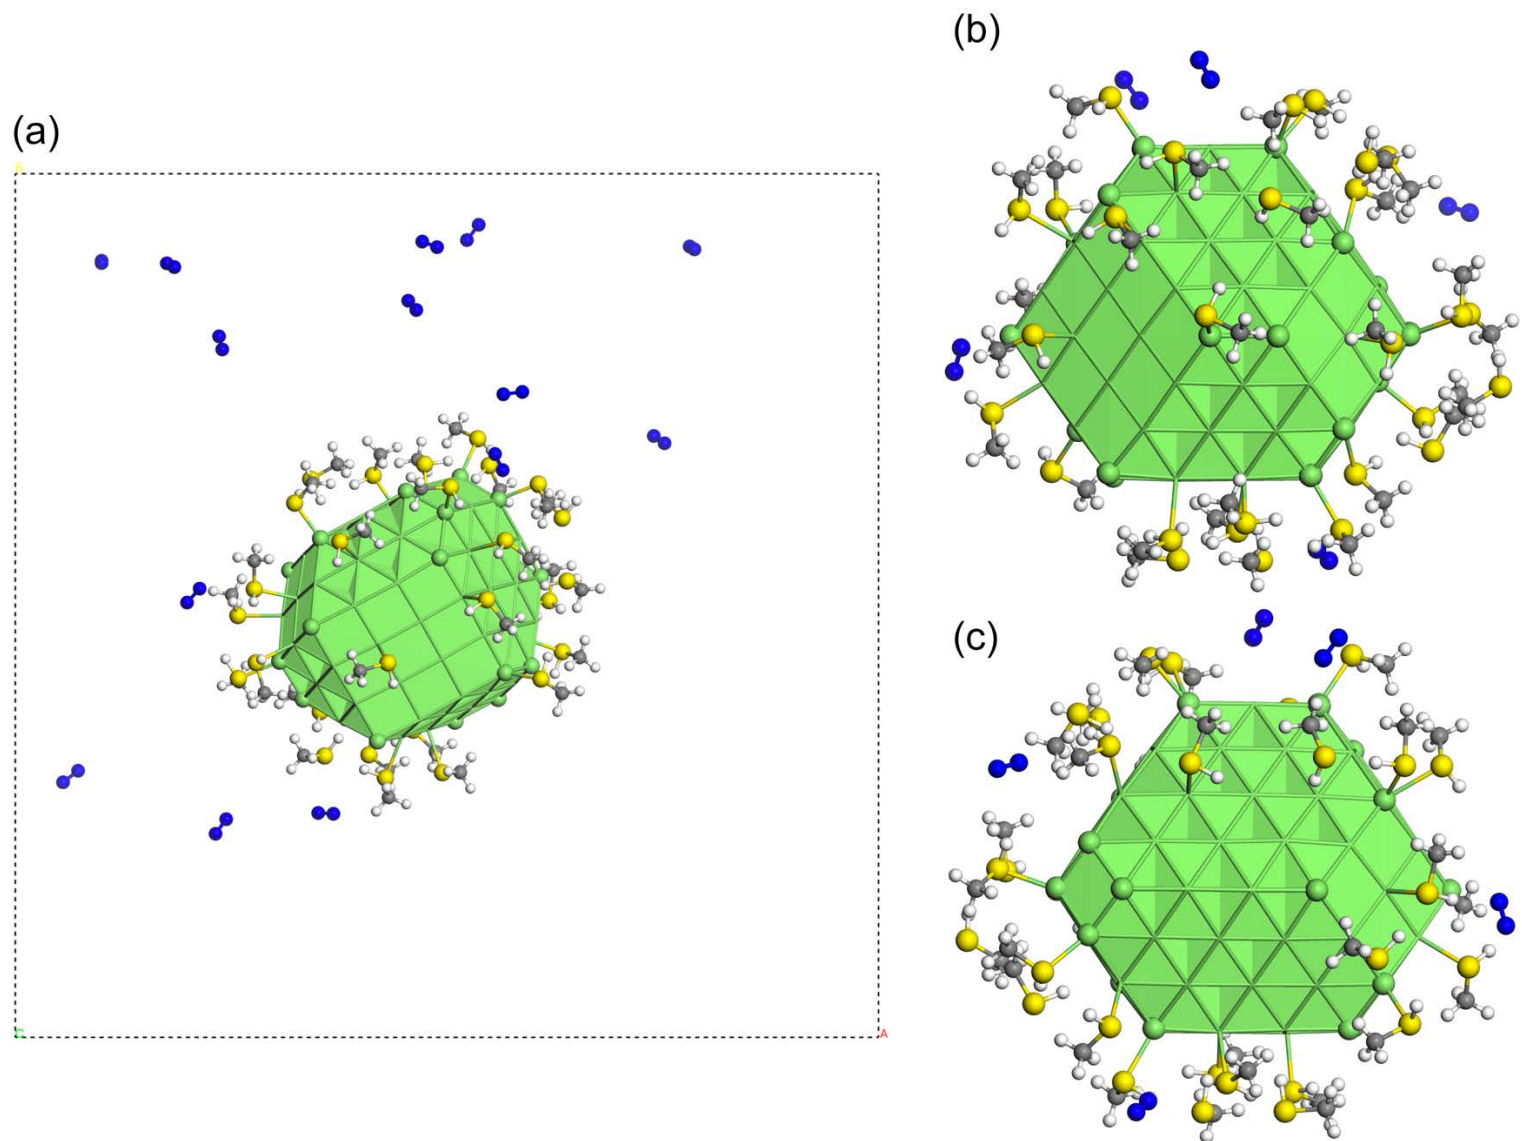

Figure S33. **[Ag<sub>17</sub>site]** Optimized coadsorption structure “dyn10\_step1283” corresponding to a shell of 32 methanethiol molecules on the Ag<sub>17</sub>site nanocluster in presence of N<sub>2</sub> gas: (a) illustration of the complete system, (b-c) several views focused on the nanoparticle (see Table 3 of article for more details about energetics). The color labels are blue for N, green for Ag, yellow for S, gray for C and white for H atoms.

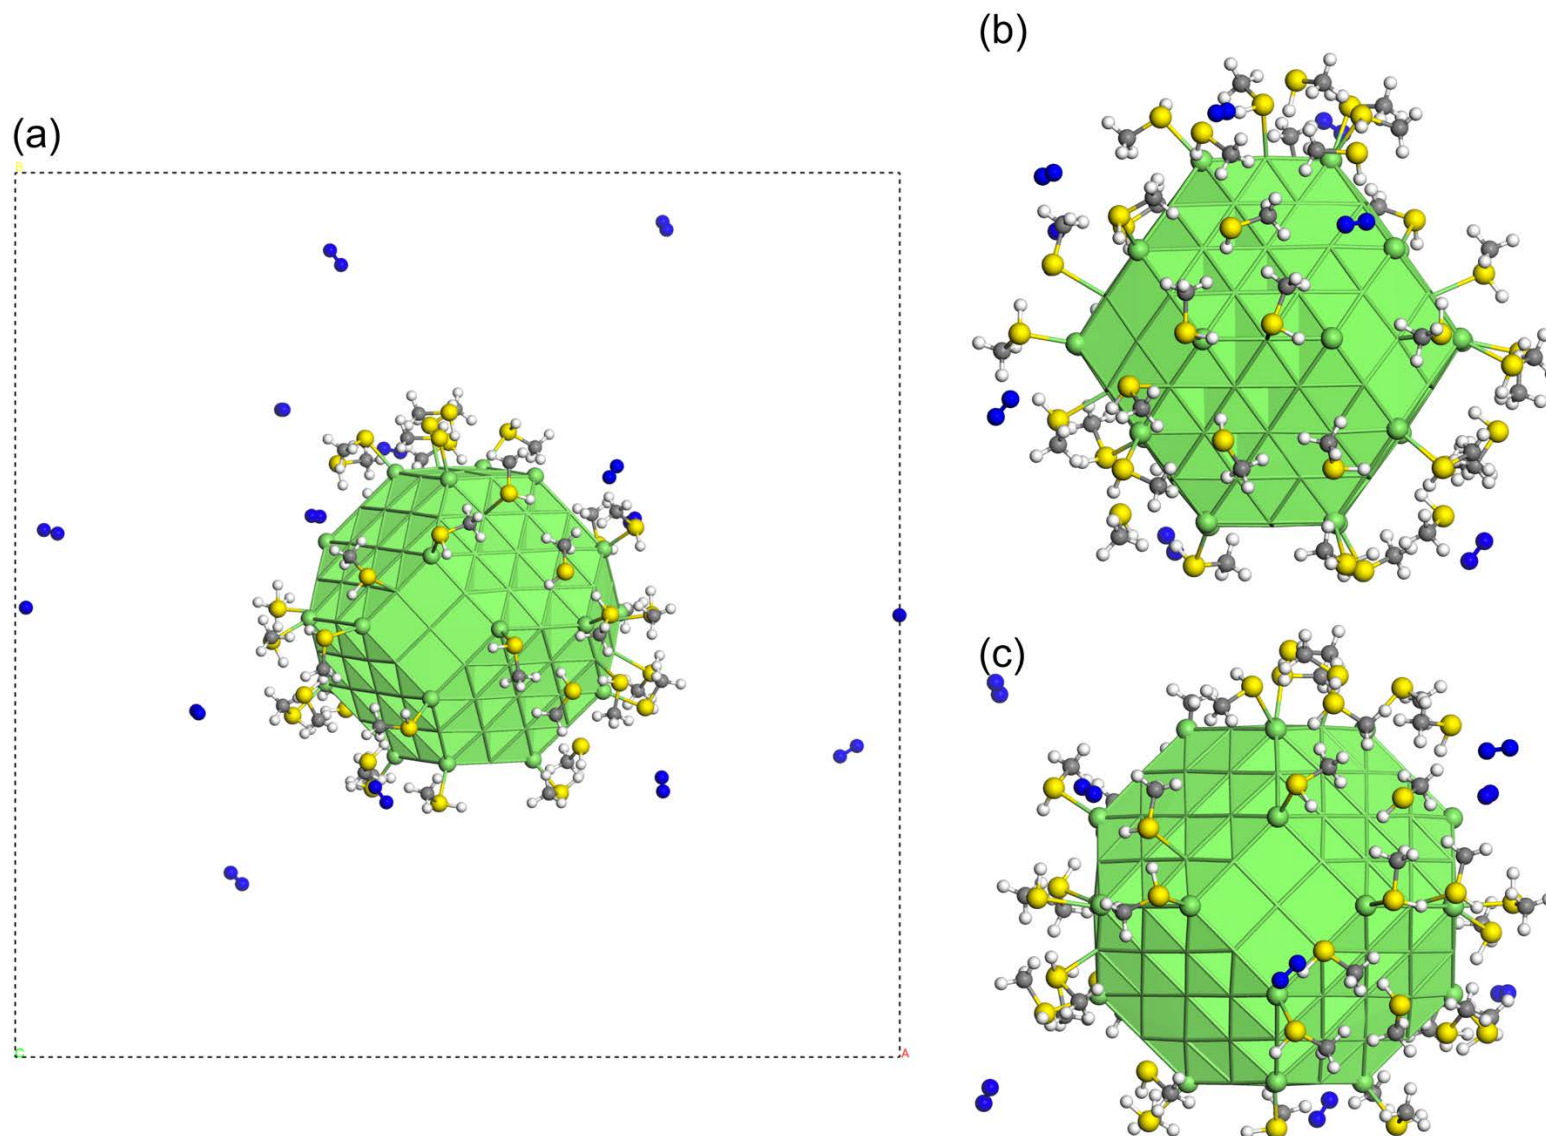

Figure S34. [Ag<sub>201</sub>rto] Optimized coadsorption structure “1\_dyn10\_step140” corresponding to a shell of 40 methanethiol molecules on the Ag<sub>201</sub>rto nanocluster in presence of N<sub>2</sub> gas: (a) illustration of the complete system, (b-c) several views focused on the nanoparticle (see Table 3 of article for more details about energetics). The color labels are blue for N, green for Ag, yellow for S, gray for C and white for H atoms.



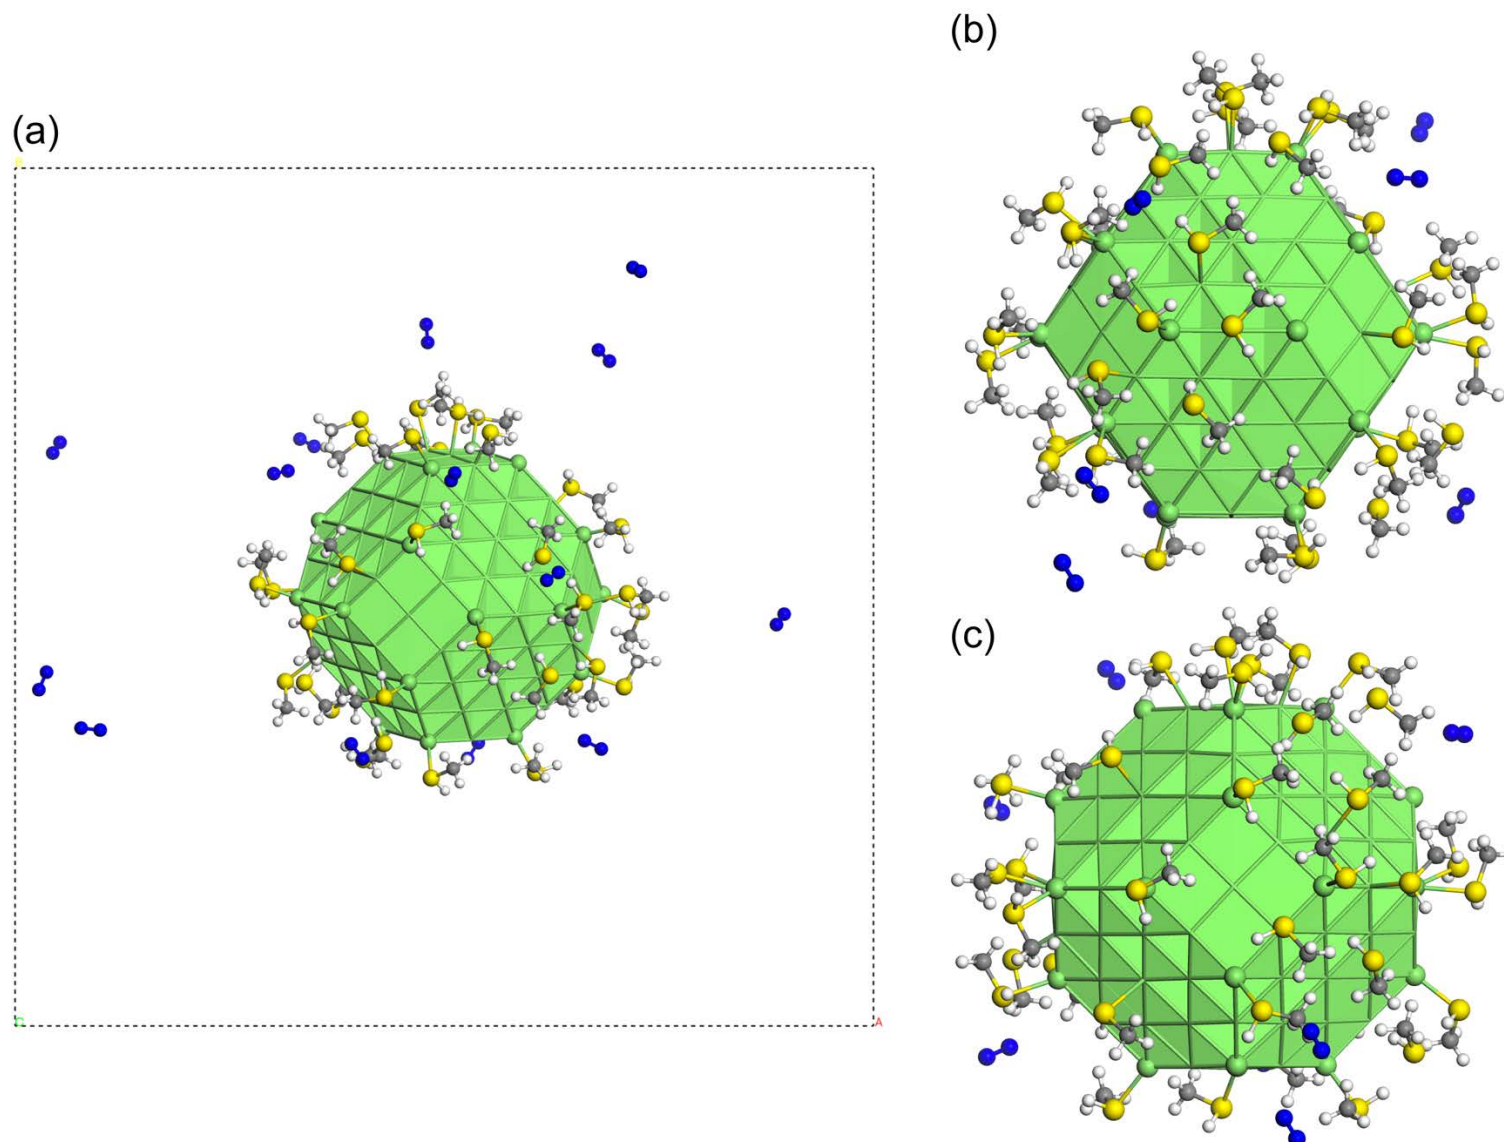

Figure S35. [Ag201rto] Optimized coadsorption structure “1\_dyn12\_step449” corresponding to a shell of 40 methanethiol molecules on the Ag201rto nanocluster in presence of N<sub>2</sub> gas: (a) illustration of the complete system, (b-c) several views focused on the nanoparticle (see Table 3 of article for more details about energetics). The color labels are blue for N, green for Ag, yellow for S, gray for C and white for H atoms.

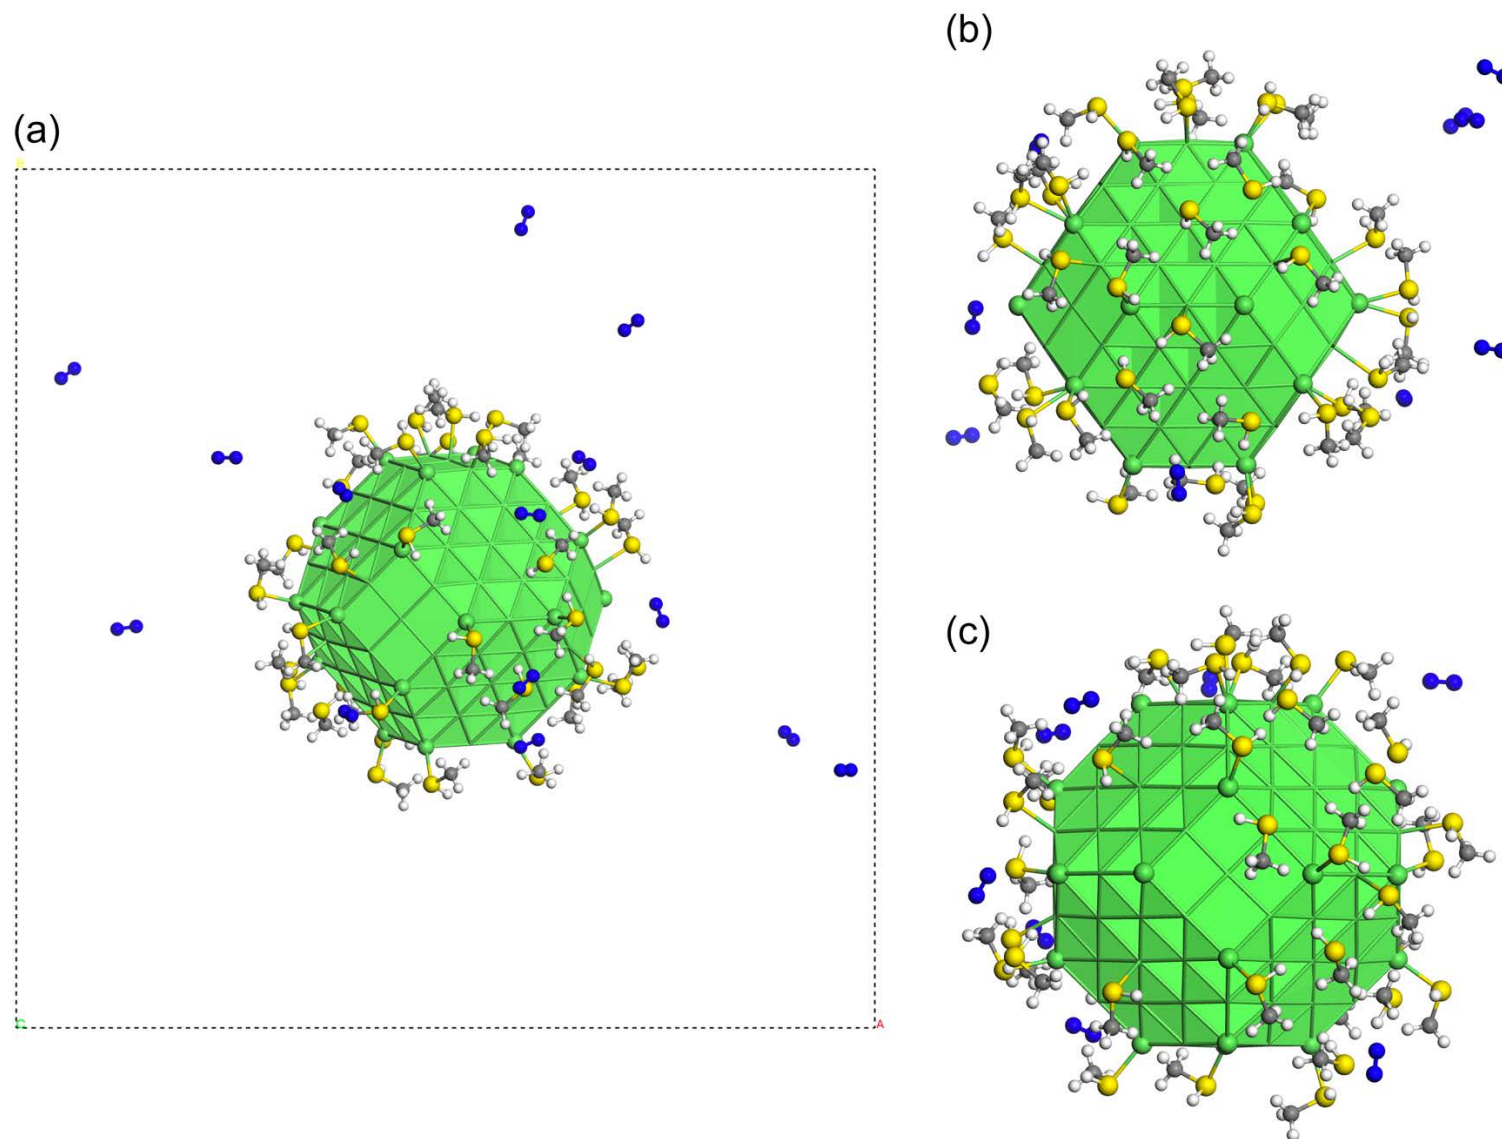

Figure S36. [Ag<sub>201</sub>rto] Optimized coadsorption structure “1\_dyn15\_step122” corresponding to a shell of 40 methanethiol molecules on the Ag<sub>201</sub>rto nanocluster in presence of N<sub>2</sub> gas: (a) illustration of the complete system, (b-c) several views focused on the nanoparticle (see Table 3 of article for more details about energetics). The color labels are blue for N, green for Ag, yellow for S, gray for C and white for H atoms.

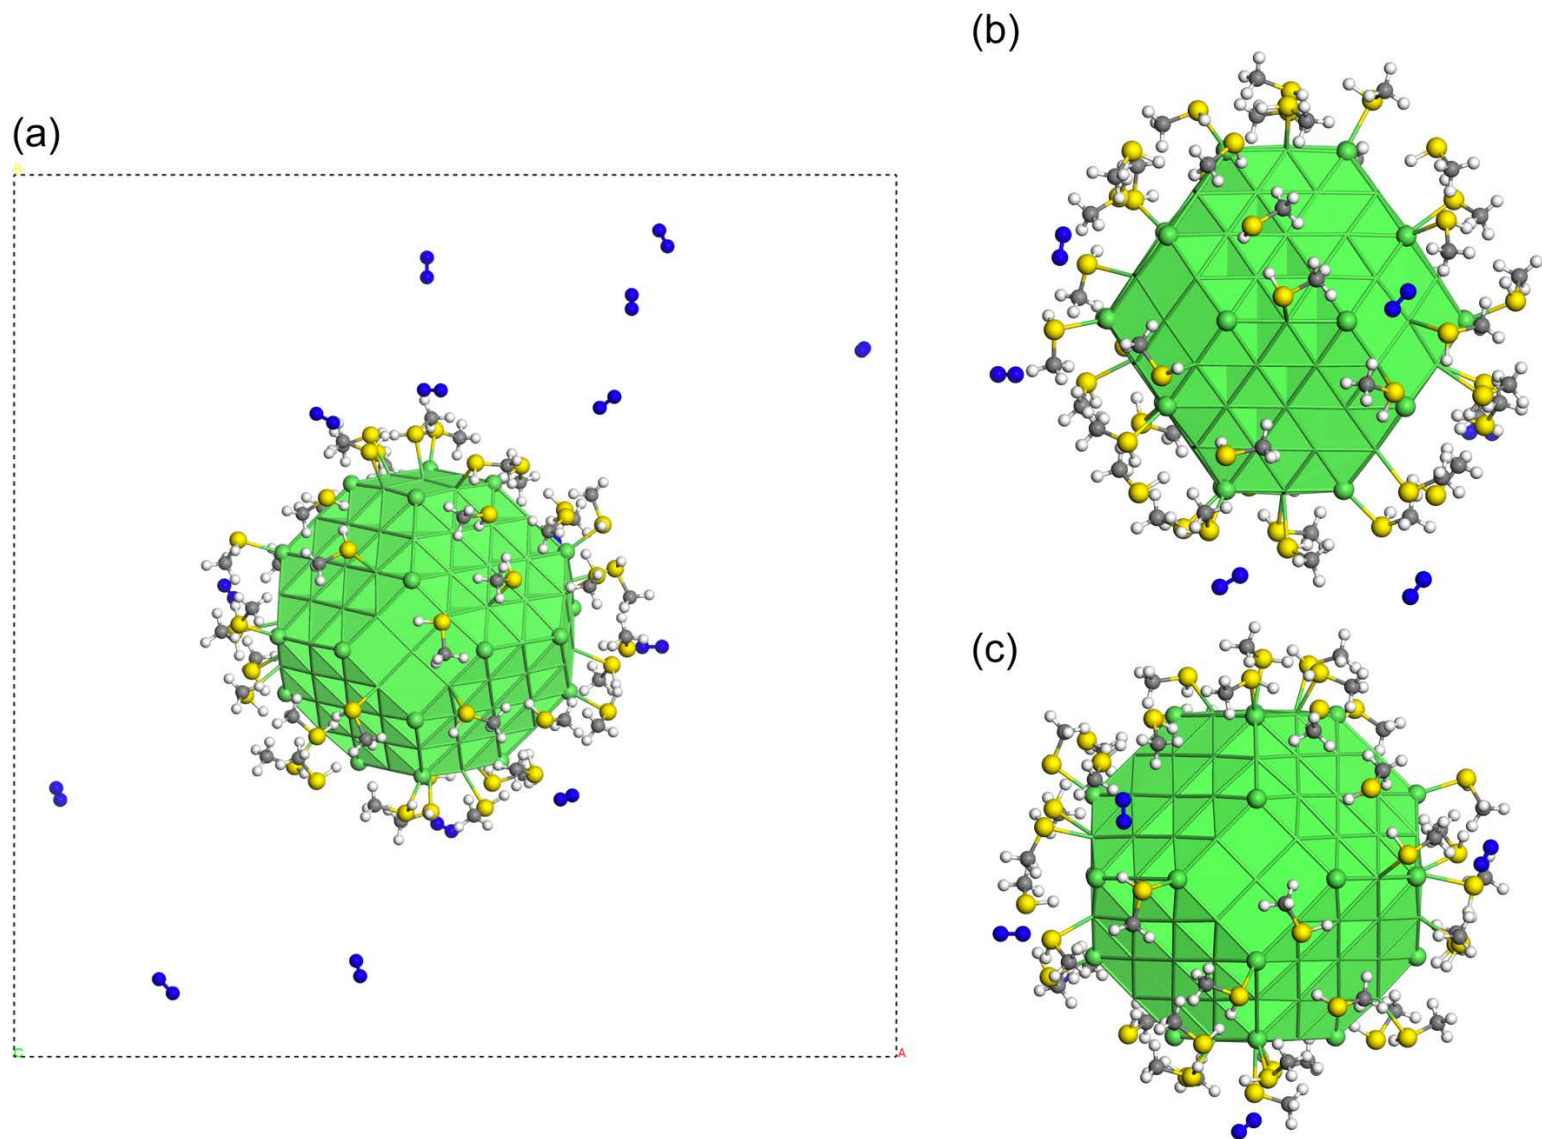

Figure S37. [Ag<sub>201rto</sub>] Optimized coadsorption structure “2\_dyn8\_step286” corresponding to a shell of 44 methanethiol molecules on the Ag<sub>201rto</sub> nanocluster in presence of N<sub>2</sub> gas: (a) illustration of the complete system, (b-c) several views focused on the nanoparticle (see Table 3 of article for more details about energetics). The color labels are blue for N, green for Ag, yellow for S, gray for C and white for H atoms.



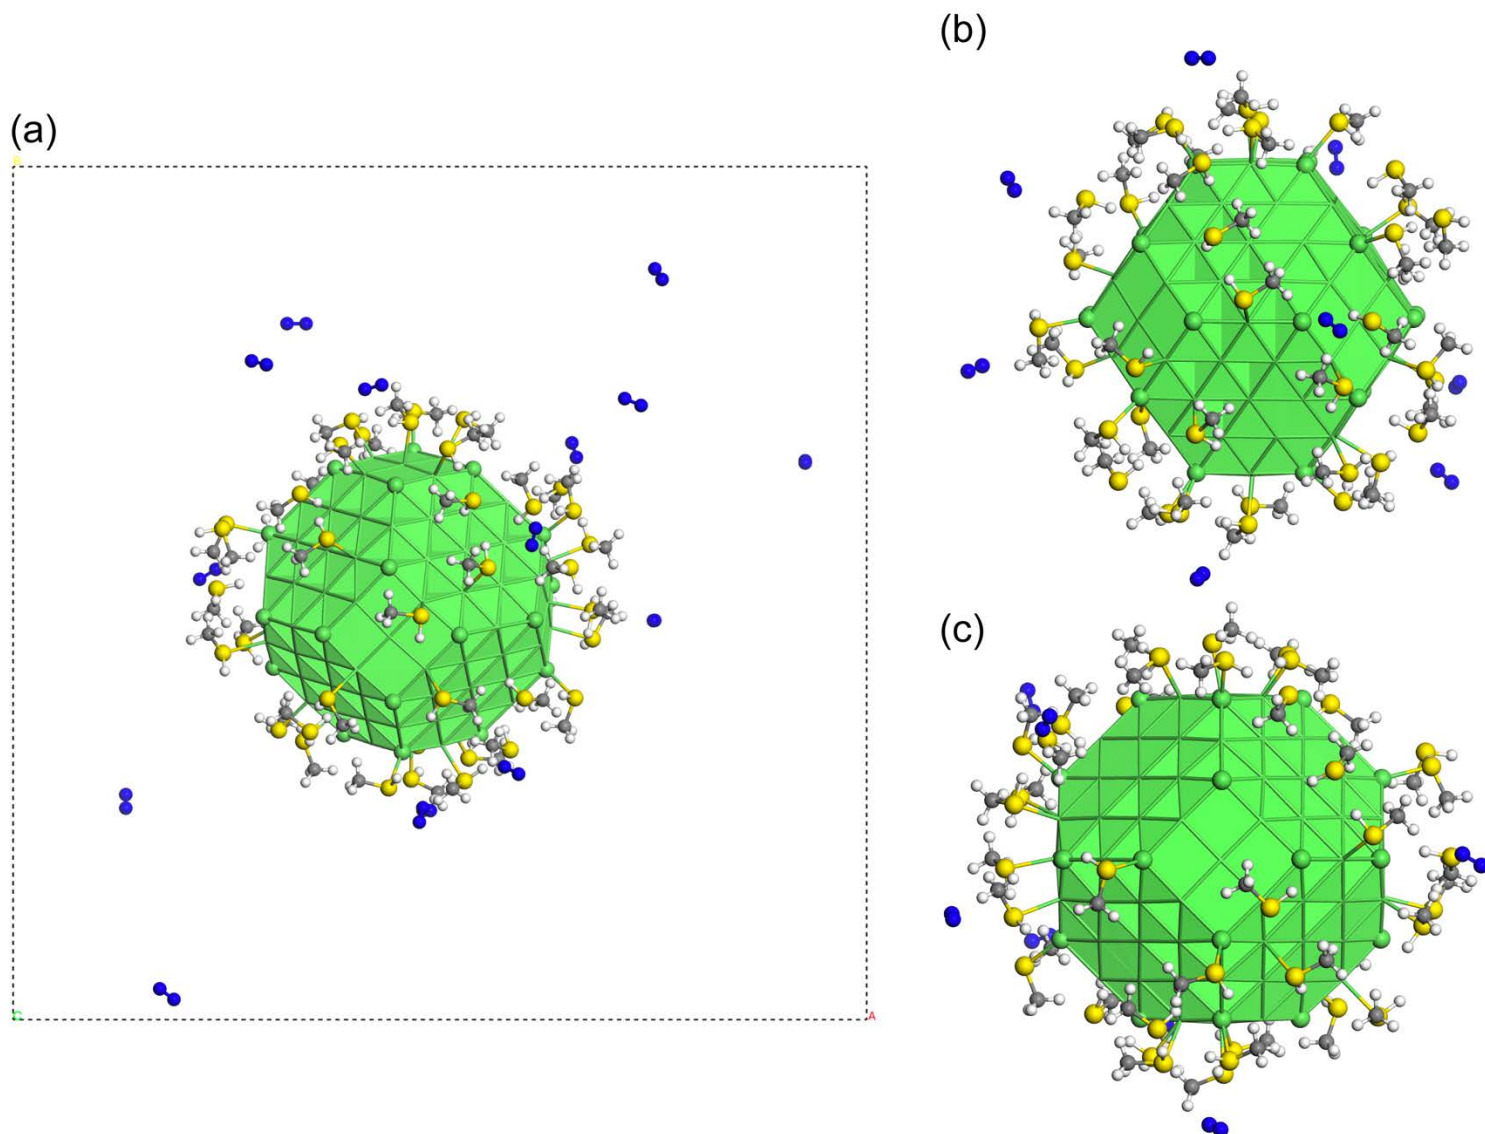

Figure S38. [Ag201rto] Optimized coadsorption structure “2\_dyn8\_step1030” corresponding to a shell of 44 methanethiol molecules on the Ag201rto nanocluster in presence of N<sub>2</sub> gas: (a) illustration of the complete system, (b-c) several views focused on the nanoparticle (see Table 3 of article for more details about energetics). The color labels are blue for N, green for Ag, yellow for S, gray for C and white for H atoms.



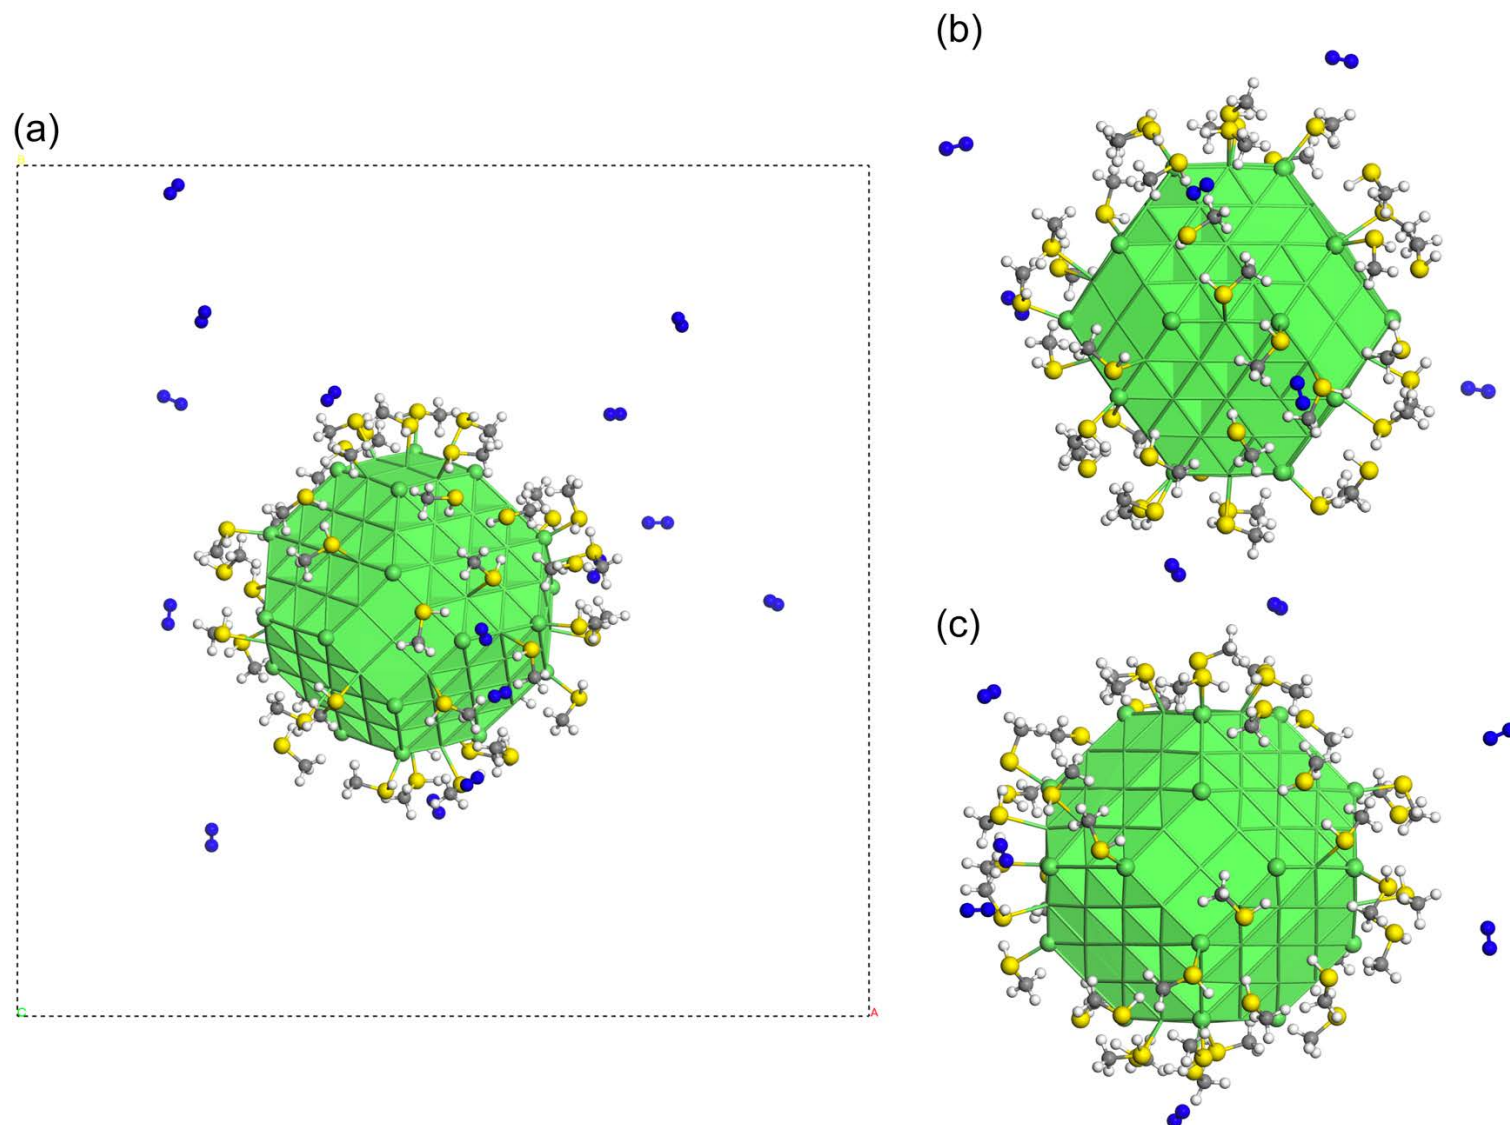

Figure S39. [Ag<sub>201rto</sub>] Optimized coadsorption structure “2\_dyn8\_step1817” corresponding to a shell of 44 methanethiol molecules on the Ag<sub>201rto</sub> nanocluster in presence of N<sub>2</sub> gas: (a) illustration of the complete system, (b-c) several views focused on the nanoparticle (see Table 3 of article for more details about energetics). The color labels are blue for N, green for Ag, yellow for S, gray for C and white for H atoms.

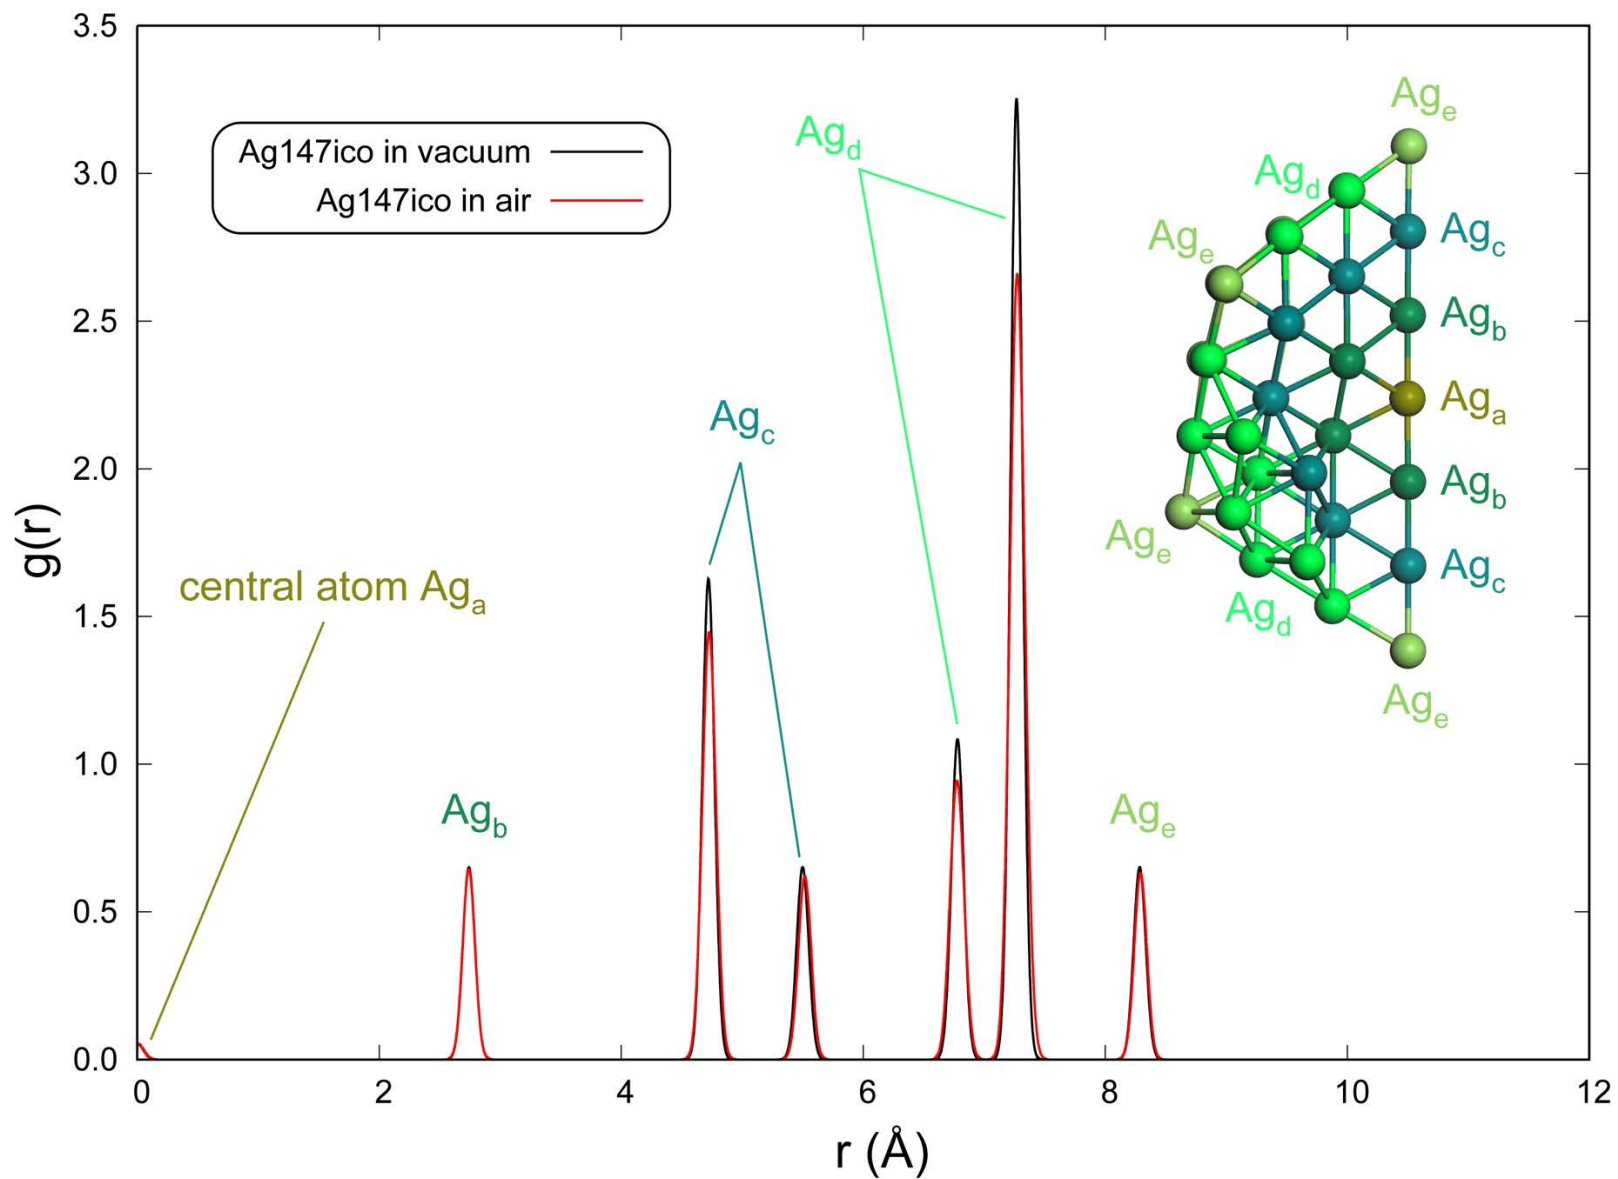

Figure S40. [**Ag147ico**] Radial distribution functions  $g(r)$  of  $Ag_{147}ico$  nanoparticle optimized either in vacuum (black) or after air exposure (red) at 300 K and corresponding to “1\_dyn14\_step31” structure. Several families of silver atoms are defined with different green colors, and illustrated accordingly.

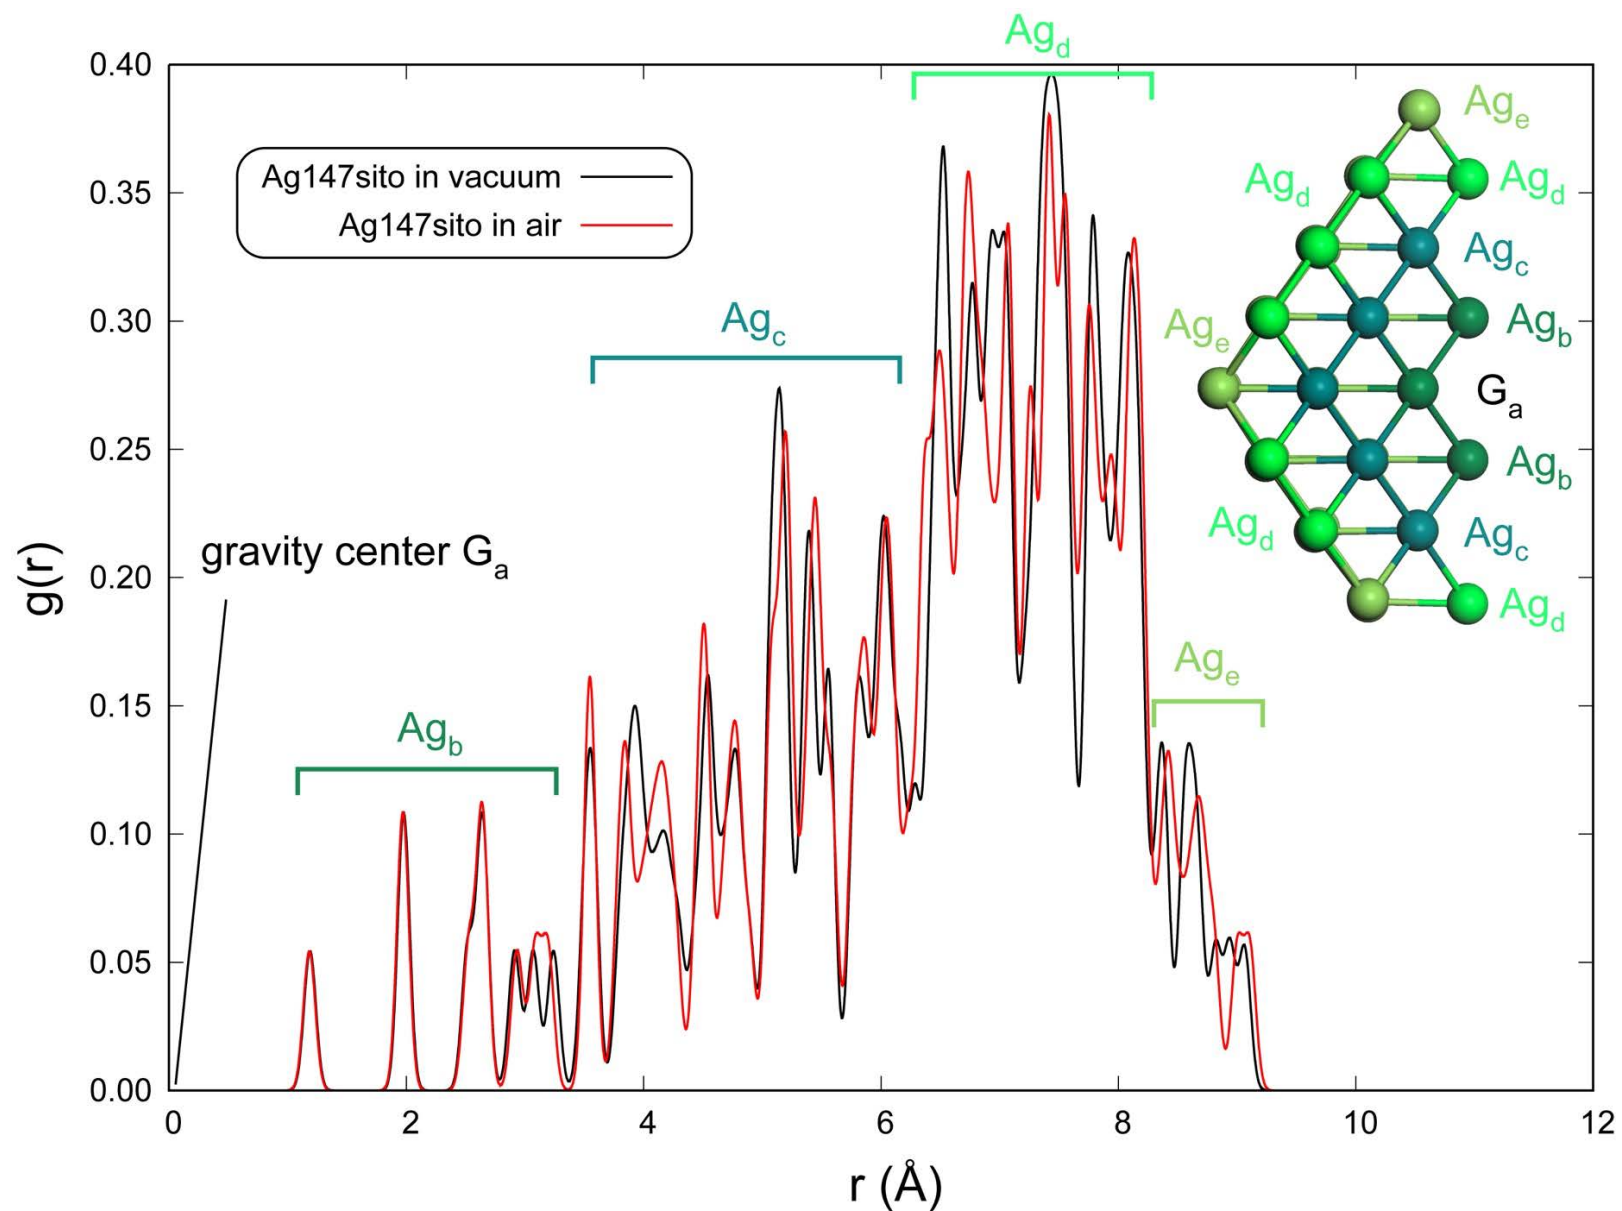

Figure S41. [**Ag147sito**] Radial distribution functions  $g(r)$  of  $Ag_{147}$ sito nanoparticle optimized either in vacuum (black) or after air exposure (red) at 300 K and corresponding to “dyn3\_step333” structure. Several families of silver atoms are defined with different green colors, and illustrated accordingly.

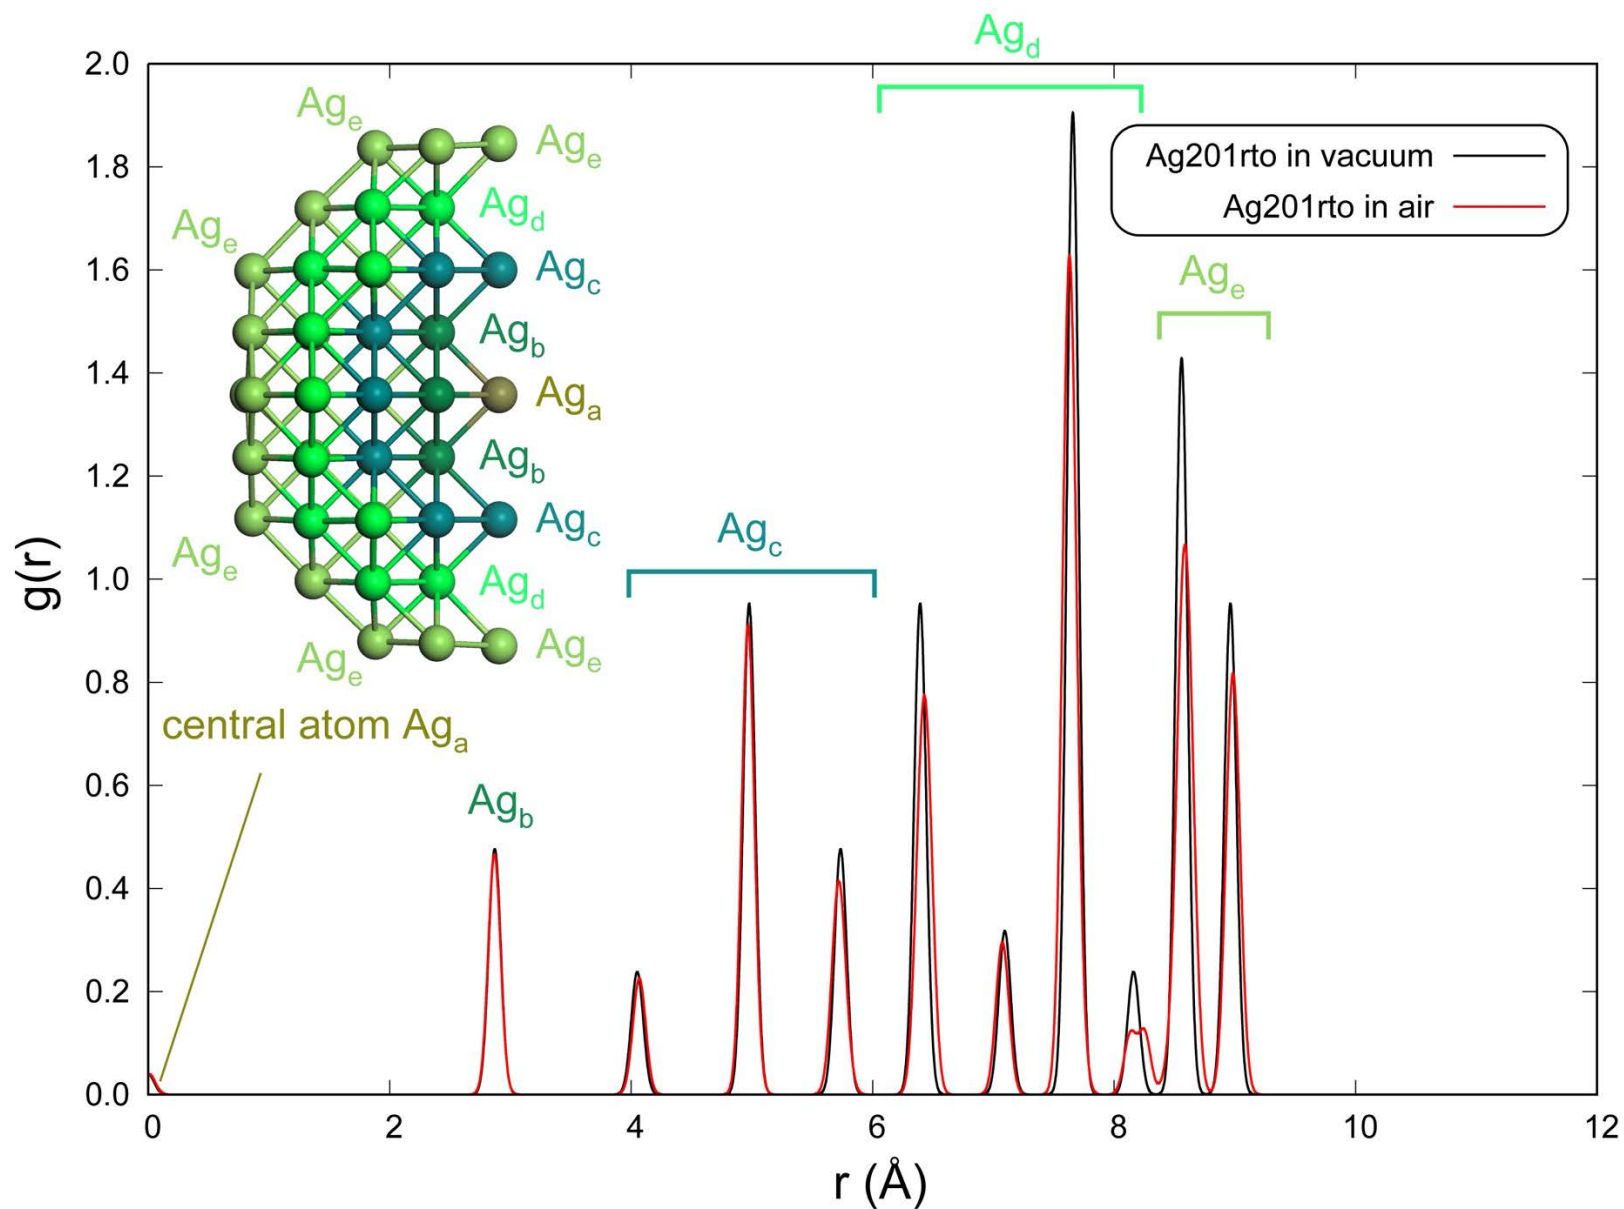

Figure S42. [**Ag201rto**] Radial distribution functions  $g(r)$  of  $Ag_{201}rto$  nanoparticle optimized either in vacuum (black) or after air exposure (red) at 300 K and corresponding to “2\_dyn8\_step286” structure. Several families of silver atoms are defined with different green colors, and illustrated accordingly.
